# Supplementary material
Source: ML conference proceedings conference paper supplement (https://openreview.net/forum?id=qkLMTphG5-h)
Supplement: supplementary_material [file 5way_1shot_Adam_AT_Only_ALL.xlsx]

## Sheet: 5way_1shot_Adam_AT_Only_ALL
		Adam	AT_Only	ALL		average	Adam	AT_Only	ALL			Adam	AT_Only	ALL		average	Adam	AT_Only	ALL			Adam	AT_Only	ALL		average	Adam	AT_Only	ALL			Adam	AT_Only	ALL		average	Adam	AT_Only	ALL			Adam	AT_Only	ALL		average	Adam	AT_Only	ALL
'cub'	1	0.2295	0.2301	0.2323		'cub'	0.285678	0.300178	0.300546		2	0.2164	0.2168	0.2198		'cub'	0.276705	0.28743	0.290424		3	0.2163	0.2142	0.2169		'cub'	0.278895	0.294884	0.295714		4	0.2139	0.2133	0.2147		'cub'	0.275676	0.286657	0.289127		5	0.2172	0.2179	0.2207		'cub'	0.285238	0.298532	0.301132
'cub'	1	0.2522	0.2532	0.258		'flower'	0.397138	0.437873	0.438368		2	0.2341	0.2379	0.243		'flower'	0.410689	0.454227	0.4536		3	0.2384	0.2357	0.2408		'flower'	0.3949	0.43487	0.434792		4	0.2345	0.2341	0.2405		'flower'	0.405416	0.445908	0.446565		5	0.2439	0.2451	0.2502		'flower'	0.403541	0.449149	0.449189
'cub'	1	0.2732	0.2769	0.2866		'mini'	0.318614	0.335292	0.337157		2	0.256	0.2578	0.2708		'mini'	0.3182	0.332489	0.334105		3	0.2625	0.265	0.277		'mini'	0.318054	0.329235	0.331454		4	0.2551	0.261	0.2734		'mini'	0.320238	0.336827	0.336632		5	0.2693	0.273	0.286		'mini'	0.321905	0.338951	0.340784
'cub'	1	0.295	0.2988	0.3137		'traffic'	0.345432	0.355762	0.357535		2	0.275	0.285	0.2957		'traffic'	0.339654	0.347219	0.349227		3	0.281	0.2913	0.3062		'traffic'	0.33183	0.342322	0.344051		4	0.2769	0.2834	0.2964		'traffic'	0.338451	0.346505	0.349262		5	0.292	0.301	0.3157		'traffic'	0.340065	0.350878	0.351473
'cub'	1	0.3152	0.322	0.3325		Average	0.336716	0.357276	0.358401		2	0.289	0.3057	0.3157		Average	0.336312	0.355341	0.356839		3	0.2964	0.3125	0.3271		Average	0.33092	0.350328	0.351503		4	0.2888	0.3025	0.3162		Average	0.334945	0.353974	0.355397		5	0.3098	0.3225	0.3367		Average	0.337687	0.359378	0.360645
'cub'	1	0.327	0.3381	0.3472				0.0205608	0.001125		2	0.3018	0.3198	0.331				0.0190291	0.00149797		3	0.3083	0.328	0.3416				0.0194081	0.001175		4	0.2976	0.3157	0.3323				0.0190291	0.0014223		5	0.3196	0.3364	0.3486				0.0216905
'cub'	1	0.3298	0.3474	0.3557							2	0.3127	0.3323	0.3384							3	0.3167	0.3406	0.3472							4	0.3088	0.3286	0.3389							5	0.3286	0.348	0.355
'cub'	1	0.334	0.354	0.3596		Top1 Acc.	Adam	AT_Only	ALL		2	0.318	0.3342	0.3408		Top1 Acc.	Adam	AT_Only	ALL		3	0.3225	0.3467	0.3545		Top1 Acc.	Adam	AT_Only	ALL		4	0.3154	0.3374	0.3438		Top1 Acc.	Adam	AT_Only	ALL		5	0.3323	0.3538	0.3586		Top1 Acc.	Adam	AT_Only	ALL
'cub'	1	0.3389	0.3562	0.3604		'cub'	0.3464	0.3591	0.3625		2	0.3225	0.337	0.3423		'cub'	0.3347	0.3435	0.3452		3	0.3293	0.351	0.355		'cub'	0.3374	0.3557	0.3562		4	0.32	0.341	0.3457		'cub'	0.3308	0.3447	0.3457		5	0.337	0.357	0.3582		'cub'	0.3484	0.3608	0.3606
'cub'	1	0.343	0.3582	0.3625		'flower'	0.5083	0.5513	0.5522		2	0.327	0.3384	0.3452		'flower'	0.517	0.5713	0.5684		3	0.3318	0.3499	0.3533		'flower'	0.505	0.544	0.541		4	0.325	0.3428	0.3452		'flower'	0.5166	0.5596	0.558		5	0.3374	0.3586	0.3606		'flower'	0.5127	0.573	0.5747
'cub'	1	0.3464	0.3552	0.3574		'mini'	0.4304	0.4487	0.4478		2	0.3347	0.3408	0.3428		'mini'	0.4302	0.4485	0.4453		3	0.3372	0.3523	0.3552		'mini'	0.4297	0.4414	0.4426		4	0.3308	0.3438	0.343		'mini'	0.4324	0.447	0.4453		5	0.346	0.3562	0.36		'mini'	0.432	0.455	0.4539
'cub'	1	0.3418	0.3577	0.3574		'traffic'	0.4375	0.4402	0.4417		2	0.3318	0.3435	0.3416		'traffic'	0.4282	0.4302	0.43		3	0.335	0.3547	0.3562		'traffic'	0.4167	0.421	0.421		4	0.3306	0.3447	0.343		'traffic'	0.415	0.4214	0.4194		5	0.3484	0.3608	0.3557		'traffic'	0.423	0.4326	0.4282
'cub'	1	0.3406	0.357	0.3547		Average	0.43065	0.449825	0.45105		2	0.3296	0.341	0.3425		Average	0.427525	0.448375	0.447225		3	0.3374	0.3557	0.353		Average	0.4222	0.440525	0.4402		4	0.3293	0.3445	0.3396		Average	0.4237	0.443175	0.4421		5	0.3455	0.3557	0.3567		Average	0.429025	0.45535	0.45435
'cub'	1	0.339	0.3591	0.3577				0.019175	0.001225		2	0.3296	0.3403	0.3413				0.02085	-0.00115		3	0.332	0.3535	0.3538				0.018325	-0.000325		4	0.3252	0.339	0.3408				0.019475	-0.001075		5	0.342	0.3525	0.3508				0.026325
'cub'	1	0.336	0.359	0.3523							2	0.323	0.3394	0.3398							3	0.3245	0.352	0.35							4	0.3206	0.334	0.3372							5	0.3347	0.3523	0.3528
'cub'	1	0.3276	0.3572	0.3552		Top-N%	Adam	AT_Only	ALL		2	0.3179	0.3398	0.3374		Top-N%	Adam	AT_Only	ALL		3	0.316	0.349	0.349		Top-N%	Adam	AT_Only	ALL		4	0.321	0.3328	0.3354		Top-N%	Adam	AT_Only	ALL		5	0.3303	0.3499	0.3533		Top-N%	Adam	AT_Only	ALL
'cub'	1	0.3247	0.3528	0.3503		'cub'	0.332187	0.351307	0.352307		2	0.3164	0.3333	0.3386		'cub'	0.31848	0.334033	0.337793		3	0.3113	0.3464	0.3423		'cub'	0.32044	0.34472	0.34794		4	0.316	0.3303	0.3318		'cub'	0.316473	0.332273	0.336433		5	0.3262	0.3523	0.3506		'cub'	0.331653	0.350253	0.353467
'cub'	1	0.32	0.3477	0.3445		'flower'	0.475993	0.53196	0.53494		2	0.3152	0.3315	0.335		'flower'	0.487913	0.545847	0.547707		3	0.3047	0.3435	0.342		'flower'	0.476247	0.526687	0.5273		4	0.311	0.3242	0.3289		'flower'	0.48356	0.539287	0.540613		5	0.3213	0.3494	0.355		'flower'	0.481827	0.54464	0.5461
'cub'	1	0.3188	0.348	0.3372		'mini'	0.401233	0.427427	0.42988		2	0.308	0.326	0.3345		'mini'	0.400607	0.424327	0.426673		3	0.3035	0.335	0.3389		'mini'	0.4021	0.419007	0.424353		4	0.307	0.3228	0.3247		'mini'	0.402107	0.427973	0.43104		5	0.3157	0.3484	0.3494		'mini'	0.404487	0.432827	0.435287
'cub'	1	0.2764	0.318	0.3132		'traffic'	0.419707	0.430747	0.434167		2	0.2703	0.3132	0.3013		'traffic'	0.410627	0.41898	0.42156		3	0.2725	0.306	0.3079		'traffic'	0.398947	0.41006	0.41276		4	0.2737	0.2976	0.2998		'traffic'	0.402313	0.41398	0.41518		5	0.2834	0.3188	0.3135		'traffic'	0.407733	0.420487	0.421267
'cub'	1	0.2761	0.312	0.301		Average	0.40728	0.43536	0.437823		2	0.2593	0.274	0.2852		Average	0.404407	0.430797	0.433433		3	0.2607	0.2888	0.2842		Average	0.399433	0.425118	0.428088		4	0.2485	0.2834	0.2751		Average	0.401113	0.428378	0.430817		5	0.2542	0.2913	0.2952		Average	0.406425	0.437052	0.43903
'cub'	1	0.264	0.2878	0.2927				0.02808	0.00246333		2	0.2532	0.28	0.275				0.02639	0.00263667		3	0.2484	0.2852	0.2808				0.025685	0.00297		4	0.2563	0.274	0.2795				0.027265	0.00243833		5	0.2637	0.2825	0.2822				0.0306267
'cub'	1	0.2603	0.2837	0.2783							2	0.2576	0.267	0.2734							3	0.256	0.274	0.277							4	0.2534	0.2642	0.2698							5	0.2625	0.2708	0.277
'cub'	1	0.2625	0.2793	0.2722		15					2	0.2534	0.265	0.2625							3	0.2554	0.2852	0.2673							4	0.255	0.264	0.2654							5	0.2637	0.2827	0.2788
'cub'	1	0.2507	0.2698	0.277		'cub'	0.3152	0.322	0.3325		2	0.2444	0.2607	0.2617		'cub'	0.289	0.3132	0.3157		3	0.2603	0.2573	0.2695		'cub'	0.2964	0.3125	0.3271		4	0.2458	0.2632	0.2585		'cub'	0.2888	0.3025	0.3162		5	0.2524	0.2715	0.265		'cub'	0.3098	0.3225	0.3367
'cub'	1	0.2507	0.2612	0.2734		'flower'	0.43	0.4836	0.4854		2	0.2466	0.2554	0.2512		'flower'	0.4336	0.4863	0.504		3	0.2427	0.2664	0.2612		'flower'	0.426	0.4792	0.4734		4	0.2461	0.2556	0.2659		'flower'	0.4302	0.4856	0.5005		5	0.2585	0.2593	0.2717		'flower'	0.4246	0.486	0.5034
'cub'	1	0.243	0.2651	0.265		'mini'	0.3594	0.3906	0.4028		2	0.249	0.2563	0.2688		'mini'	0.3572	0.3801	0.3955		3	0.2576	0.2656	0.257		'mini'	0.357	0.3738	0.3916		4	0.2445	0.2566	0.2556		'mini'	0.3586	0.3828	0.401		5	0.2568	0.2683	0.2686		'mini'	0.3596	0.3896	0.4062
'cub'	1	0.2617	0.2583	0.263		'traffic'	0.3943	0.3997	0.4097		2	0.2537	0.2576	0.2563		'traffic'	0.3865	0.3958	0.4045		3	0.252	0.261	0.2678		'traffic'	0.3662	0.379	0.3867		4	0.2617	0.2583	0.25		'traffic'	0.3823	0.3972	0.4055		5	0.2507	0.2646	0.268		'traffic'	0.3867	0.395	0.4033
'cub'	1	0.2445	0.265	0.2556		Average	0.374725	0.398975	0.4076		2	0.2412	0.255	0.2512		Average	0.366575	0.39385	0.404925		3	0.25	0.254	0.2524		Average	0.3614	0.386125	0.3947		4	0.2502	0.2496	0.246		Average	0.364975	0.392025	0.4058		5	0.2512	0.2556	0.2566		Average	0.370175	0.398275	0.4124
'cub'	1	0.2458	0.2537	0.2496					0.008625		2	0.2412	0.252	0.243					0.011075		3	0.2451	0.261	0.2507					0.008575		4	0.2418	0.2546	0.2482					0.013775		5	0.242	0.2585	0.2507
'cub'	1	0.2446	0.2467	0.2495							2	0.2428	0.244	0.2446							3	0.2433	0.2466	0.2433							4	0.2418	0.2527	0.2537							5	0.2515	0.2554	0.2446
'cub'	1	0.2404	0.2488	0.2452							2	0.2411	0.2413	0.2437							3	0.2427	0.2455	0.2522							4	0.2417	0.244	0.2477							5	0.2502	0.2384	0.2466
'cub'	1	0.2517	0.2455	0.2418							2	0.2429	0.2467	0.2476							3	0.2383	0.2366	0.2401							4	0.2484	0.237	0.2405							5	0.2482	0.2423	0.2454
'cub'	1	0.2466	0.2502	0.2424							2	0.248	0.2449	0.2512							3	0.2491	0.2515	0.2456							4	0.2384	0.2416	0.2379							5	0.2401	0.2448	0.2542
'cub'	1	0.2448	0.2472	0.2483							2	0.2495	0.2415	0.2394							3	0.2444	0.2461	0.2407							4	0.242	0.2498	0.2382							5	0.249	0.2507	0.2522
'cub'	1	0.242	0.2424	0.2388							2	0.2385	0.2413	0.2432							3	0.2517	0.2505	0.2426							4	0.2437	0.2446	0.2454							5	0.2401	0.2467	0.254
'cub'	1	0.2316	0.2433	0.238							2	0.2467	0.2385	0.2502							3	0.2441	0.2524	0.2411							4	0.2395	0.2396	0.249							5	0.2384	0.2527	0.243
'flower'	1	0.2365	0.2332	0.2375							2	0.2405	0.2401	0.2452							3	0.246	0.2428	0.2484							4	0.2397	0.2383	0.2433							5	0.2365	0.2362	0.2437
'flower'	1	0.291	0.2937	0.3115							2	0.2969	0.2976	0.3142							3	0.2966	0.2976	0.3115							4	0.2952	0.298	0.3145							5	0.29	0.2952	0.3093
'flower'	1	0.3477	0.3623	0.388							2	0.3535	0.3645	0.3887							3	0.3467	0.3538	0.3801							4	0.3533	0.3623	0.3865							5	0.343	0.3516	0.3735
'flower'	1	0.395	0.4175	0.4414							2	0.4014	0.419	0.4414							3	0.393	0.4126	0.4353							4	0.3987	0.4165	0.4387							5	0.3894	0.4067	0.4348
'flower'	1	0.43	0.4583	0.4795							2	0.4336	0.4553	0.48							3	0.426	0.4517	0.4734							4	0.4302	0.4583	0.4756							5	0.4246	0.4524	0.478
'flower'	1	0.4517	0.4836	0.5024							2	0.4546	0.486	0.504							3	0.4485	0.4792	0.4958							4	0.4543	0.4822	0.501							5	0.4504	0.4846	0.5034
'flower'	1	0.4668	0.503	0.517							2	0.4678	0.507	0.522							3	0.4656	0.4988	0.513							4	0.4695	0.5034	0.517							5	0.4631	0.505	0.5176
'flower'	1	0.477	0.5146	0.5264							2	0.4814	0.518	0.5293							3	0.4773	0.5093	0.5234							4	0.4792	0.516	0.5264							5	0.4758	0.518	0.5273
'flower'	1	0.4844	0.524	0.5317							2	0.4917	0.527	0.54							3	0.4832	0.5215	0.5264							4	0.488	0.5264	0.5337							5	0.4856	0.526	0.5312
'flower'	1	0.4907	0.53	0.5366							2	0.4998	0.5347	0.5464							3	0.488	0.525	0.5327							4	0.4958	0.5337	0.5386							5	0.493	0.531	0.533
'flower'	1	0.5083	0.5464	0.546							2	0.5166	0.5547	0.5566							3	0.505	0.5396	0.5396							4	0.5156	0.552	0.547							5	0.507	0.548	0.55
'flower'	1	0.508	0.5493	0.5503							2	0.517	0.5605	0.5625							3	0.5044	0.544	0.54							4	0.5166	0.5537	0.5557							5	0.5127	0.5586	0.559
'flower'	1	0.5054	0.5513	0.5522							2	0.514	0.566	0.5654							3	0.5034	0.541	0.5405							4	0.5127	0.5596	0.5557							5	0.5054	0.5625	0.565
'flower'	1	0.4995	0.5513	0.5513							2	0.51	0.5684	0.5684							3	0.4966	0.544	0.541							4	0.503	0.5586	0.558							5	0.505	0.566	0.567
'flower'	1	0.4907	0.551	0.55							2	0.504	0.5713	0.5605							3	0.4866	0.5415	0.54							4	0.4934	0.553	0.557							5	0.4976	0.573	0.5747
'flower'	1	0.4753	0.547	0.5513							2	0.4954	0.57	0.5654							3	0.479	0.5425	0.538							4	0.484	0.5566	0.5576							5	0.4902	0.5728	0.5684
'flower'	1	0.4634	0.5483	0.547							2	0.4885	0.5684	0.563							3	0.4695	0.54	0.532							4	0.4763	0.5557	0.557							5	0.4824	0.5684	0.566
'flower'	1	0.4507	0.5444	0.5425							2	0.4785	0.569	0.5625							3	0.4646	0.5396	0.5337							4	0.4722	0.557	0.5547							5	0.4734	0.5693	0.563
'flower'	1	0.438	0.5415	0.534							2	0.4658	0.5674	0.5566							3	0.446	0.538	0.54							4	0.4626	0.557	0.5493							5	0.4612	0.5684	0.5586
'flower'	1	0.3855	0.4937	0.4854							2	0.4014	0.519	0.513							3	0.3892	0.4963	0.473							4	0.4077	0.521	0.5005							5	0.4016	0.5166	0.5073
'flower'	1	0.3633	0.4531	0.4487							2	0.3923	0.4863	0.4744							3	0.3694	0.4639	0.4429							4	0.389	0.4856	0.474							5	0.3845	0.486	0.4666
'flower'	1	0.359	0.4438	0.4353							2	0.3804	0.4702	0.4595							3	0.356	0.441	0.4326							4	0.3848	0.4548	0.4429							5	0.3792	0.4497	0.439
'flower'	1	0.351	0.4243	0.4185							2	0.379	0.4426	0.434							3	0.348	0.4126	0.415							4	0.366	0.4324	0.4287							5	0.3665	0.4355	0.4277
'flower'	1	0.3484	0.4077	0.397							2	0.362	0.4404	0.424							3	0.3423	0.4084	0.3948							4	0.3687	0.425	0.42							5	0.3691	0.4146	0.421
'flower'	1	0.3652	0.4001	0.3904							2	0.374	0.431	0.425							3	0.3428	0.415	0.3955							4	0.376	0.4187	0.4114							5	0.3506	0.4211	0.4016
'flower'	1	0.3562	0.3958	0.3965							2	0.3774	0.415	0.4067							3	0.3586	0.4033	0.3767							4	0.3516	0.415	0.4092							5	0.356	0.4084	0.4019
'flower'	1	0.3486	0.3972	0.389							2	0.3745	0.4065	0.4006							3	0.36	0.3906	0.386							4	0.3516	0.3955	0.3987							5	0.3625	0.4023	0.3994
'flower'	1	0.3582	0.3987	0.3762							2	0.3623	0.3984	0.3992							3	0.3525	0.3843	0.3845							4	0.369	0.3943	0.3965							5	0.3623	0.3982	0.3894
'flower'	1	0.3418	0.373	0.3643							2	0.3523	0.3765	0.401							3	0.336	0.3557	0.365							4	0.363	0.3738	0.3608							5	0.3518	0.3862	0.3782
'flower'	1	0.3386	0.346	0.3486							2	0.3467	0.3845	0.3804							3	0.3418	0.353	0.3357							4	0.3606	0.362	0.3667							5	0.3542	0.3647	0.377
'flower'	1	0.3489	0.3582	0.366							2	0.3635	0.3672	0.3748							3	0.3325	0.3474	0.3433							4	0.3362	0.3606	0.3647							5	0.3447	0.366	0.3586
'flower'	1	0.339	0.3584	0.3335							2	0.3481	0.3767	0.358							3	0.3215	0.342	0.3464							4	0.3433	0.343	0.3445							5	0.3438	0.363	0.357
'flower'	1	0.3384	0.343	0.3376							2	0.3489	0.378	0.3594							3	0.3362	0.3303	0.3433							4	0.3447	0.367	0.3591							5	0.3464	0.3674	0.3386
'flower'	1	0.3264	0.3293	0.3423							2	0.3394	0.372	0.3586							3	0.3298	0.3345	0.3396							4	0.3293	0.3657	0.3474							5	0.3384	0.3674	0.358
'flower'	1	0.338	0.357	0.343							2	0.3538	0.3706	0.343							3	0.3274	0.3557	0.339							4	0.3364	0.3572	0.3528							5	0.35	0.3591	0.3684
'flower'	1	0.3337	0.331	0.3147							2	0.362	0.3462	0.345							3	0.3198	0.359	0.3398							4	0.3428	0.3457	0.3325							5	0.3398	0.358	0.346
'flower'	1	0.3438	0.3403	0.336							2	0.3665	0.3804	0.3545							3	0.3215	0.3347	0.3494							4	0.3394	0.343	0.3452							5	0.3433	0.3606	0.3608
'mini'	1	0.2378	0.2393	0.244							2	0.2325	0.2332	0.2397							3	0.231	0.2291	0.234							4	0.2318	0.2303	0.2343							5	0.236	0.2362	0.2411
'mini'	1	0.269	0.2742	0.2869							2	0.2722	0.2761	0.2876							3	0.2678	0.268	0.2805							4	0.2656	0.2644	0.2756							5	0.2712	0.2715	0.2815
'mini'	1	0.3037	0.317	0.338							2	0.3054	0.3157	0.331							3	0.304	0.309	0.3242							4	0.297	0.3076	0.323							5	0.3074	0.3154	0.3298
'mini'	1	0.3328	0.3545	0.376							2	0.3354	0.3533	0.3708							3	0.331	0.3413	0.363							4	0.331	0.3486	0.37							5	0.3403	0.355	0.371
'mini'	1	0.3594	0.3906	0.4065							2	0.3572	0.3801	0.3955							3	0.357	0.3738	0.3916							4	0.3586	0.3828	0.401							5	0.3596	0.3896	0.4062
'mini'	1	0.3828	0.4126	0.4238							2	0.3738	0.3977	0.4136							3	0.3752	0.396	0.41							4	0.378	0.4067	0.423							5	0.376	0.4062	0.424
'mini'	1	0.3972	0.427	0.4336							2	0.3867	0.4153	0.4285							3	0.3867	0.411	0.4268							4	0.3933	0.4236	0.4346							5	0.39	0.421	0.439
'mini'	1	0.4062	0.4338	0.4434							2	0.3938	0.429	0.4375							3	0.3977	0.424	0.4314							4	0.4023	0.4338	0.4412							5	0.3987	0.435	0.4443
'mini'	1	0.414	0.4412	0.446							2	0.4011	0.4368	0.4412							3	0.4033	0.4297	0.4348							4	0.4124	0.442	0.4421							5	0.4055	0.442	0.4502
'mini'	1	0.4167	0.4443	0.4473							2	0.406	0.4397	0.4426							3	0.4075	0.4348	0.4385							4	0.4167	0.4436	0.4453							5	0.411	0.4468	0.4539
'mini'	1	0.4304	0.4487	0.4478							2	0.423	0.4485	0.4453							3	0.4297	0.4414	0.441							4	0.4321	0.447	0.444							5	0.4297	0.455	0.4475
'mini'	1	0.429	0.4463	0.4429							2	0.4302	0.448	0.4429							3	0.4297	0.4392	0.4426							4	0.4324	0.4438	0.442							5	0.432	0.453	0.4485
'mini'	1	0.427	0.443	0.4363							2	0.428	0.4443	0.4387							3	0.4272	0.434	0.4365							4	0.4236	0.4402	0.443							5	0.4287	0.452	0.445
'mini'	1	0.4197	0.437	0.431							2	0.422	0.436	0.438							3	0.4204	0.4333	0.4355							4	0.4172	0.4373	0.4316							5	0.4253	0.4429	0.4392
'mini'	1	0.41	0.4285	0.4275							2	0.4138	0.4302	0.4314							3	0.4116	0.426	0.4282							4	0.4114	0.432	0.4348							5	0.4187	0.4402	0.438
'mini'	1	0.3984	0.4238	0.4224							2	0.4084	0.429	0.4214							3	0.407	0.4246	0.4214							4	0.4014	0.427	0.4302							5	0.41	0.4363	0.4353
'mini'	1	0.3884	0.4185	0.4229							2	0.401	0.4177	0.4163							3	0.3982	0.4114	0.4163							4	0.3936	0.4294	0.4229							5	0.405	0.4338	0.4272
'mini'	1	0.3733	0.4084	0.414							2	0.3867	0.4106	0.41							3	0.3948	0.4065	0.4084							4	0.3853	0.4202	0.4185							5	0.3926	0.424	0.4167
'mini'	1	0.366	0.4077	0.4028							2	0.3774	0.402	0.3972							3	0.3855	0.3994	0.4023							4	0.3733	0.4102	0.4114							5	0.3845	0.4146	0.4143
'mini'	1	0.3057	0.345	0.343							2	0.316	0.3384	0.3345							3	0.31	0.3337	0.3313							4	0.3096	0.3494	0.3381							5	0.3152	0.353	0.3518
'mini'	1	0.2817	0.3154	0.3071							2	0.2805	0.3171	0.304							3	0.2974	0.3174	0.302							4	0.29	0.324	0.313							5	0.2932	0.3162	0.3208
'mini'	1	0.2795	0.3018	0.2974							2	0.2769	0.2966	0.2878							3	0.2717	0.29	0.293							4	0.2766	0.3	0.3							5	0.2832	0.3013	0.3037
'mini'	1	0.268	0.282	0.28							2	0.2646	0.294	0.278							3	0.262	0.2822	0.278							4	0.276	0.2886	0.2888							5	0.2754	0.2864	0.2896
'mini'	1	0.269	0.2744	0.271							2	0.2542	0.2764	0.275							3	0.2654	0.2717	0.2744							4	0.2593	0.2808	0.2708							5	0.2698	0.2808	0.2778
'mini'	1	0.2578	0.263	0.2773							2	0.2532	0.2683	0.266							3	0.2537	0.2712	0.2634							4	0.258	0.277	0.266							5	0.2646	0.2764	0.2793
'mini'	1	0.2622	0.265	0.2666							2	0.2664	0.2678	0.2705							3	0.2605	0.2744	0.2769							4	0.265	0.2683	0.275							5	0.261	0.2676	0.2712
'mini'	1	0.2595	0.2632	0.26							2	0.258	0.269	0.2566							3	0.2507	0.264	0.2693							4	0.2651	0.2656	0.2646							5	0.259	0.2712	0.273
'mini'	1	0.2432	0.2617	0.2595							2	0.2507	0.25	0.2598							3	0.2534	0.2563	0.254							4	0.2576	0.2686	0.2659							5	0.26	0.2737	0.2666
'mini'	1	0.2537	0.252	0.2605							2	0.2505	0.25	0.2473							3	0.2395	0.2415	0.252							4	0.2517	0.259	0.2576							5	0.2522	0.2554	0.2551
'mini'	1	0.251	0.2588	0.2455							2	0.242	0.2429	0.2515							3	0.2507	0.2473	0.2452							4	0.2566	0.2484	0.2386							5	0.2465	0.251	0.251
'mini'	1	0.2416	0.2488	0.2397							2	0.2466	0.2413	0.2467							3	0.2522	0.2444	0.2395							4	0.255	0.2583	0.2527							5	0.2456	0.251	0.2495
'mini'	1	0.235	0.2405	0.2413							2	0.2449	0.2401	0.2522							3	0.2416	0.247	0.236							4	0.2585	0.2595	0.2438							5	0.2408	0.258	0.2413
'mini'	1	0.2412	0.2515	0.2422							2	0.2344	0.2426	0.2404							3	0.2299	0.2404	0.2316							4	0.2556	0.2432	0.2396							5	0.2507	0.2472	0.2474
'mini'	1	0.2476	0.2448	0.2505							2	0.2457	0.2397	0.2448							3	0.2344	0.2451	0.2312							4	0.242	0.2517	0.2462							5	0.2467	0.2465	0.243
'mini'	1	0.242	0.2554	0.2479							2	0.2495	0.2401	0.2417							3	0.238	0.2368	0.2412							4	0.2408	0.2487	0.2408							5	0.2407	0.2479	0.2502
'mini'	1	0.251	0.2473	0.2505							2	0.2374	0.2379	0.2404							3	0.2537	0.2465	0.2383							4	0.2383	0.244	0.2388							5	0.241	0.241	0.2477
'mini'	1	0.2372	0.2388	0.2417							2	0.2473	0.2467	0.2355							3	0.2379	0.2393	0.2395							4	0.2361	0.257	0.2466							5	0.2427	0.2461	0.2373
'traffic'	1	0.2451	0.2441	0.2505							2	0.2372	0.2367	0.2417							3	0.2256	0.2252	0.2283							4	0.2522	0.252	0.257							5	0.2286	0.2266	0.2307
'traffic'	1	0.296	0.2966	0.3098							2	0.291	0.2847	0.2996							3	0.272	0.2698	0.2805							4	0.3022	0.3018	0.3096							5	0.286	0.2842	0.2966
'traffic'	1	0.3452	0.3462	0.3613							2	0.3386	0.3372	0.3545							3	0.3125	0.3206	0.3374							4	0.3445	0.3416	0.356							5	0.3389	0.34	0.353
'traffic'	1	0.375	0.381	0.392							2	0.3718	0.3743	0.3894							3	0.345	0.3525	0.3665							4	0.3713	0.3755	0.3896							5	0.3733	0.3718	0.387
'traffic'	1	0.3943	0.3997	0.4097							2	0.392	0.3958	0.4045							3	0.3662	0.379	0.3867							4	0.3906	0.3972	0.4055							5	0.3928	0.395	0.4033
'traffic'	1	0.4092	0.4177	0.423							2	0.4006	0.4111	0.4148							3	0.3801	0.3916	0.4014							4	0.3977	0.409	0.4124							5	0.4048	0.4102	0.4165
'traffic'	1	0.4155	0.4253	0.4314							2	0.407	0.4158	0.4204							3	0.3892	0.4014	0.4094							4	0.404	0.4143	0.416							5	0.4126	0.419	0.421
'traffic'	1	0.4233	0.4304	0.4355							2	0.415	0.4229	0.4268							3	0.3967	0.4067	0.4128							4	0.4077	0.417	0.4158							5	0.4126	0.4219	0.4243
'traffic'	1	0.4277	0.4368	0.4365							2	0.418	0.4265	0.4277							3	0.4006	0.4092	0.415							4	0.4084	0.4185	0.415							5	0.4163	0.424	0.4238
'traffic'	1	0.4302	0.4375	0.4377							2	0.4194	0.4302	0.43							3	0.4033	0.4172	0.4167							4	0.411	0.419	0.4187							5	0.4197	0.427	0.425
'traffic'	1	0.4375	0.437	0.436							2	0.4282	0.4287	0.4297							3	0.415	0.421	0.4163							4	0.415	0.4214	0.4194							5	0.423	0.4326	0.4282
'traffic'	1	0.4348	0.4375	0.434							2	0.4275	0.4285	0.4277							3	0.4167	0.4207	0.4197							4	0.4126	0.4177	0.417							5	0.4224	0.4314	0.427
'traffic'	1	0.4307	0.4402	0.4402							2	0.425	0.4253	0.426							3	0.411	0.4177	0.4182							4	0.4111	0.4185	0.4185							5	0.4165	0.426	0.4248
'traffic'	1	0.4272	0.4392	0.4392							2	0.4172	0.4211	0.425							3	0.4087	0.4197	0.42							4	0.4087	0.4182	0.4175							5	0.4126	0.4275	0.423
'traffic'	1	0.4255	0.4375	0.4375							2	0.4102	0.4211	0.422							3	0.4058	0.4163	0.4204							4	0.4062	0.4155	0.4167							5	0.4084	0.419	0.4236
'traffic'	1	0.4224	0.4363	0.4417							2	0.4094	0.4214	0.4216							3	0.4065	0.414	0.421							4	0.3994	0.4126	0.4155							5	0.4026	0.421	0.4214
'traffic'	1	0.4146	0.4321	0.44							2	0.405	0.4158	0.4182							3	0.3987	0.417	0.4124							4	0.3918	0.4148	0.4155							5	0.395	0.4214	0.4194
'traffic'	1	0.4033	0.4297	0.4363							2	0.3984	0.4155	0.418							3	0.3953	0.4092	0.412							4	0.3882	0.409	0.4106							5	0.39	0.417	0.4192
'traffic'	1	0.3994	0.4243	0.4338							2	0.3865	0.405	0.411							3	0.3904	0.4102	0.4094							4	0.3823	0.407	0.4136							5	0.3867	0.4143	0.4185
'traffic'	1	0.364	0.3926	0.3867							2	0.3513	0.3738	0.38							3	0.3435	0.3774	0.376							4	0.3406	0.375	0.3835							5	0.3438	0.3857	0.3855
'traffic'	1	0.3293	0.3655	0.3691							2	0.3289	0.3545	0.3516							3	0.319	0.3447	0.341							4	0.3237	0.346	0.3572							5	0.3264	0.3496	0.3684
'traffic'	1	0.308	0.337	0.3506							2	0.3025	0.3357	0.3352							3	0.3171	0.327	0.3274							4	0.3154	0.338	0.3372							5	0.319	0.3428	0.3333
'traffic'	1	0.3171	0.3228	0.323							2	0.294	0.3176	0.327							3	0.3022	0.317	0.3242							4	0.3005	0.3184	0.3206							5	0.3054	0.3386	0.3276
'traffic'	1	0.2988	0.3171	0.314							2	0.2935	0.3154	0.3137							3	0.287	0.3115	0.3196							4	0.2922	0.3074	0.315							5	0.2913	0.3208	0.3176
'traffic'	1	0.2974	0.3057	0.3167							2	0.3044	0.3015	0.3074							3	0.2808	0.3044	0.3015							4	0.2969	0.3096	0.3062							5	0.2976	0.3157	0.3027
'traffic'	1	0.2913	0.2927	0.3079							2	0.2808	0.3071	0.295							3	0.291	0.303	0.304							4	0.2952	0.2993	0.3							5	0.297	0.3047	0.3108
'traffic'	1	0.2964	0.2957	0.305							2	0.2986	0.2922	0.291							3	0.2822	0.2979	0.2988							4	0.296	0.2952	0.3							5	0.3027	0.3066	0.3123
'traffic'	1	0.2852	0.2957	0.2954							2	0.28	0.2908	0.296							3	0.286	0.298	0.297							4	0.2856	0.2993	0.2925							5	0.2908	0.2976	0.3125
'traffic'	1	0.2842	0.2927	0.2854							2	0.2883	0.2869	0.2856							3	0.2678	0.286	0.2837							4	0.2754	0.285	0.297							5	0.276	0.287	0.2922
'traffic'	1	0.2715	0.282	0.277							2	0.2769	0.2805	0.2798							3	0.2776	0.2783	0.285							4	0.2654	0.2925	0.2788							5	0.2793	0.2834	0.2842
'traffic'	1	0.2737	0.2817	0.267							2	0.2822	0.2703	0.2673							3	0.268	0.2734	0.2698							4	0.281	0.2683	0.2712							5	0.2656	0.272	0.275
'traffic'	1	0.264	0.283	0.2722							2	0.2644	0.2766	0.267							3	0.2656	0.2725	0.2678							4	0.2725	0.2664	0.2712							5	0.279	0.274	0.2605
'traffic'	1	0.2651	0.2751	0.271							2	0.263	0.2744	0.279							3	0.2754	0.278	0.2727							4	0.279	0.2654	0.276							5	0.2622	0.2734	0.2688
'traffic'	1	0.268	0.2673	0.2659							2	0.2737	0.2664	0.2612							3	0.2554	0.2678	0.267							4	0.273	0.2678	0.2668							5	0.2727	0.278	0.266
'traffic'	1	0.2737	0.2795	0.266							2	0.2532	0.2646	0.2542							3	0.279	0.269	0.2583							4	0.2788	0.2693	0.2695							5	0.2722	0.2659	0.2683
'traffic'	1	0.2686	0.271	0.262							2	0.2708	0.2632	0.2568							3	0.2722	0.279	0.2737							4	0.2744	0.274	0.2676							5	0.2742	0.2795	0.2688
'traffic'	1	0.2678	0.277	0.2678							2	0.2627	0.258	0.265							3	0.2686	0.262	0.2583							4	0.2722	0.2632	0.2725							5	0.2844	0.2773	0.2637
