# Supplementary material
Source: ML conference proceedings conference paper supplement (https://openreview.net/forum?id=qkLMTphG5-h)
Supplement: supplementary_material [file 5way_1shot_SGD_AT_Only_ALL.xlsx]

## Sheet: 5way_1shot_SGD_AT_Only_ALL
		SGD	AT_Only	ALL		average	SGD	AT_Only	ALL			SGD	AT_Only	ALL		average	SGD	AT_Only	ALL			SGD	AT_Only	ALL		average	SGD	AT_Only	ALL			SGD	AT_Only	ALL		average	SGD	AT_Only	ALL			SGD	AT_Only	ALL		average	SGD	AT_Only	ALL
'cub'	1	0.216	0.22	0.2225		'cub'	0.306881	0.292989	0.303335		2	0.2058	0.2072	0.211		'cub'	0.291849	0.280473	0.290232		3	0.2006	0.2037	0.2098		'cub'	0.300416	0.287632	0.297432		4	0.2013	0.2037	0.209		'cub'	0.296543	0.284646	0.295262		5	0.2028	0.2078	0.2119		'cub'	0.303684	0.293151	0.303062
'cub'	1	0.2188	0.2229	0.2327		'flower'	0.397886	0.381735	0.402984		2	0.208	0.2129	0.2206		'flower'	0.409143	0.391657	0.41193		3	0.2036	0.2124	0.2223		'flower'	0.401216	0.383751	0.402819		4	0.2039	0.211	0.2197		'flower'	0.407516	0.387911	0.409073		5	0.2065	0.2142	0.2267		'flower'	0.404459	0.388357	0.409751
'cub'	1	0.2212	0.2292	0.2476		'mini'	0.373	0.347543	0.365216		2	0.2109	0.2198	0.2312		'mini'	0.372959	0.346749	0.361881		3	0.2079	0.2201	0.2358		'mini'	0.367632	0.342276	0.35853		4	0.2078	0.2172	0.2292		'mini'	0.37397	0.346803	0.36283		5	0.2098	0.224	0.2404		'mini'	0.371259	0.3453	0.361303
'cub'	1	0.2225	0.237	0.2595		'traffic'	0.348862	0.340938	0.352381		2	0.2135	0.2255	0.2386		'traffic'	0.343932	0.333005	0.346935		3	0.2114	0.2268	0.247		'traffic'	0.328089	0.325054	0.337843		4	0.2103	0.2225	0.2413		'traffic'	0.337251	0.331908	0.344195		5	0.2136	0.232	0.2532		'traffic'	0.342278	0.332008	0.346965
'cub'	1	0.2261	0.2444	0.2698		Average	0.356657	0.340801	0.355979		2	0.216	0.2316	0.2527		Average	0.354471	0.337971	0.352745		3	0.2153	0.2345	0.2595		Average	0.349339	0.334678	0.349156		4	0.212	0.2292	0.2527		Average	0.35382	0.337817	0.35284		5	0.2177	0.2386	0.2654		Average	0.35542	0.339704	0.35527
'cub'	1	0.228	0.2534	0.2827				-0.0158561	0.0151777		2	0.2186	0.236	0.2625				-0.0165	0.0147736		3	0.2184	0.2404	0.2742				-0.0146601	0.0144777		4	0.214	0.2369	0.2654				-0.0160034	0.015023		5	0.2205	0.2476	0.2795				-0.0157162
'cub'	1	0.2323	0.2593	0.2937							2	0.2212	0.2408	0.2734							3	0.2228	0.2468	0.2886							4	0.218	0.2449	0.2783							5	0.223	0.2556	0.2915
'cub'	1	0.2355	0.2654	0.3022		Top1 Acc.	SGD	AT_Only	ALL		2	0.2235	0.2467	0.283		Top1 Acc.	SGD	AT_Only	ALL		3	0.2269	0.2542	0.2979		Top1 Acc.	SGD	AT_Only	ALL		4	0.2208	0.2507	0.2874		Top1 Acc.	SGD	AT_Only	ALL		5	0.2272	0.262	0.302		Top1 Acc.	SGD	AT_Only	ALL
'cub'	1	0.2386	0.2727	0.3115		'cub'	0.3652	0.3667	0.3674		2	0.227	0.2542	0.289		'cub'	0.3503	0.3557	0.3525		3	0.2292	0.2637	0.3054		'cub'	0.3625	0.3635	0.3616		4	0.2249	0.257	0.295		'cub'	0.361	0.3608	0.3665		5	0.2316	0.2686	0.3113		'cub'	0.3635	0.371	0.3696
'cub'	1	0.2426	0.2783	0.319		'flower'	0.5083	0.5317	0.531		2	0.2289	0.261	0.2964		'flower'	0.5283	0.559	0.5566		3	0.2323	0.271	0.3098		'flower'	0.511	0.543	0.5293		4	0.2275	0.265	0.3037		'flower'	0.5195	0.5425	0.544		5	0.2366	0.2776	0.3223		'flower'	0.522	0.546	0.5464
'cub'	1	0.2705	0.3257	0.348		'mini'	0.4656	0.4697	0.4688		2	0.252	0.3042	0.329		'mini'	0.4692	0.4658	0.4666		3	0.2612	0.319	0.34		'mini'	0.454	0.4563	0.4568		4	0.2556	0.3098	0.337		'mini'	0.4734	0.4717	0.4685		5	0.2642	0.3313	0.3506		'mini'	0.4614	0.458	0.4612
'cub'	1	0.2915	0.3413	0.3564		'traffic'	0.4443	0.4502	0.45		2	0.2695	0.326	0.3354		'traffic'	0.4338	0.4363	0.4377		3	0.2827	0.338	0.3486		'traffic'	0.4246	0.433	0.433		4	0.2737	0.3271	0.3425		'traffic'	0.419	0.4265	0.427		5	0.2844	0.3455	0.3538		'traffic'	0.4373	0.4377	0.4404
'cub'	1	0.3074	0.352	0.3572		Average	0.44585	0.454575	0.4543		2	0.285	0.3306	0.3398		Average	0.4454	0.4542	0.45335		3	0.2964	0.3408	0.3503		Average	0.438025	0.44895	0.445175		4	0.2896	0.3384	0.3447		Average	0.443225	0.450375	0.4515		5	0.3022	0.35	0.3591		Average	0.44605	0.453175	0.4544
'cub'	1	0.3174	0.3528	0.3574				0.008725	-0.000275		2	0.2952	0.3345	0.3423				0.0088	-0.00085		3	0.3074	0.3462	0.3523				0.010925	-0.003775		4	0.297	0.341	0.3467				0.00715	0.001125		5	0.3113	0.3535	0.36				0.007125
'cub'	1	0.3235	0.3557	0.3577							2	0.3018	0.3376	0.3438							3	0.3137	0.3477	0.353							4	0.3042	0.3447	0.3486							5	0.3188	0.357	0.361
'cub'	1	0.329	0.3555	0.3586		Top-N%	SGD	AT_Only	ALL		2	0.3057	0.3374	0.3438		Top-N%	SGD	AT_Only	ALL		3	0.3188	0.35	0.3555		Top-N%	SGD	AT_Only	ALL		4	0.308	0.3452	0.3477		Top-N%	SGD	AT_Only	ALL		5	0.3235	0.3604	0.361		Top-N%	SGD	AT_Only	ALL
'cub'	1	0.3318	0.3564	0.357		'cub'	0.352793	0.360287	0.36172		2	0.3105	0.338	0.3452		'cub'	0.337307	0.34498	0.347113		3	0.322	0.3503	0.356		'cub'	0.350707	0.35506	0.356693		4	0.3115	0.346	0.3474		'cub'	0.34734	0.352347	0.356073		5	0.3247	0.36	0.362		'cub'	0.352673	0.363507	0.36404
'cub'	1	0.335	0.3582	0.359		'flower'	0.488927	0.520073	0.522793		2	0.3147	0.3406	0.346		'flower'	0.506247	0.536973	0.54032		3	0.324	0.3523	0.3562		'flower'	0.491933	0.521293	0.521407		4	0.314	0.3474	0.3474		'flower'	0.5042	0.528513	0.53208		5	0.3281	0.3608	0.3638		'flower'	0.501193	0.53056	0.53352
'cub'	1	0.337	0.359	0.3606		'mini'	0.449433	0.4561	0.4592		2	0.3152	0.3416	0.3457		'mini'	0.451733	0.454773	0.456747		3	0.325	0.351	0.3562		'mini'	0.444027	0.448513	0.45134		4	0.3171	0.3457	0.3467		'mini'	0.455687	0.460513	0.460433		5	0.3315	0.3594	0.3635		'mini'	0.445067	0.449694	0.45446
'cub'	1	0.3452	0.3591	0.3633		'traffic'	0.43012	0.440467	0.43982		2	0.326	0.348	0.3516		'traffic'	0.417467	0.42852	0.430973		3	0.3381	0.356	0.3599		'traffic'	0.404287	0.42256	0.424213		4	0.3318	0.3508	0.3533		'traffic'	0.406713	0.420793	0.421973		5	0.3435	0.3645	0.3677		'traffic'	0.420547	0.431093	0.433967
'cub'	1	0.3506	0.361	0.3635		Average	0.430318	0.444232	0.445883		2	0.3298	0.3525	0.3525		Average	0.428188	0.441312	0.443788		3	0.3457	0.3574	0.3616		Average	0.422738	0.436857	0.438413		4	0.3354	0.355	0.3628		Average	0.428485	0.440542	0.44264		5	0.3508	0.367	0.3667		Average	0.42987	0.443713	0.446497
'cub'	1	0.353	0.3616	0.3674				0.0139133	0.00165167		2	0.3347	0.3557	0.3516				0.0131233	0.00247667		3	0.3489	0.36	0.359				0.0141183	0.00155667		4	0.339	0.3596	0.3647				0.0120567	0.00209833		5	0.3552	0.3684	0.3694				0.0138434
'cub'	1	0.355	0.3645	0.3645							2	0.3374	0.3542	0.351							3	0.3538	0.3596	0.3599							4	0.3438	0.3606	0.366							5	0.3572	0.3665	0.3696
'cub'	1	0.3577	0.3633	0.362		15					2	0.3416	0.3486	0.347							3	0.3557	0.3635	0.3606							4	0.3477	0.3584	0.3665							5	0.359	0.371	0.3647
'cub'	1	0.3594	0.3667	0.3635		'cub'	0.335	0.3528	0.3572		2	0.346	0.35	0.3489		'cub'	0.321	0.3345	0.3423		3	0.358	0.3604	0.3584		'cub'	0.3271	0.3462	0.3523		4	0.3535	0.3574	0.365		'cub'	0.3318	0.341	0.3467		5	0.3596	0.3674	0.3665		'cub'	0.3323	0.3535	0.3594
'cub'	1	0.3596	0.3667	0.3633		'flower'	0.4592	0.499	0.5137		2	0.3486	0.35	0.3474		'flower'	0.4688	0.5054	0.525		3	0.36	0.3567	0.3557		'flower'	0.4614	0.503	0.5117		4	0.3582	0.3608	0.3662		'flower'	0.4766	0.5083	0.5205		5	0.3635	0.3704	0.3645		'flower'	0.463	0.51	0.519
'cub'	1	0.3638	0.363	0.3662		'mini'	0.4214	0.4395	0.4485		2	0.35	0.3447	0.3457		'mini'	0.4265	0.4414	0.4446		3	0.3625	0.3586	0.3528		'mini'	0.4197	0.437	0.4395		4	0.3577	0.3596	0.3586		'mini'	0.4255	0.4453	0.452		5	0.3635	0.3645	0.3594		'mini'	0.4185	0.4373	0.4436
'cub'	1	0.3652	0.3608	0.3616		'traffic'	0.4028	0.4302	0.4321		2	0.3503	0.3413	0.3442		'traffic'	0.398	0.4187	0.4233		3	0.3616	0.3562	0.3533		'traffic'	0.3806	0.4087	0.4106		4	0.3577	0.353	0.3535		'traffic'	0.3853	0.4128	0.418		5	0.3623	0.3618	0.3608		'traffic'	0.398	0.4236	0.4265
'cub'	1	0.3606	0.3167	0.3364		Average	0.4046	0.430375	0.437875		2	0.3452	0.2908	0.307		Average	0.403575	0.425	0.4338		3	0.359	0.3162	0.3215		Average	0.3972	0.423725	0.428525		4	0.361	0.301	0.3213		Average	0.4048	0.42685	0.4343		5	0.356	0.3105	0.3225		Average	0.40295	0.4311	0.437125
'cub'	1	0.3562	0.2206	0.2426					0.0075		2	0.341	0.215	0.235					0.0088		3	0.3572	0.221	0.2318					0.0048		4	0.3557	0.218	0.2302					0.00745		5	0.353	0.2091	0.2407
'cub'	1	0.3506	0.2026	0.2068							2	0.3354	0.1981	0.2119							3	0.352	0.2019	0.2087							4	0.3533	0.2023	0.2098							5	0.3496	0.2085	0.2173
'cub'	1	0.343	0.2008	0.2012							2	0.3264	0.2012	0.2042							3	0.345	0.2032	0.1959							4	0.3457	0.2023	0.2098							5	0.3438	0.2047	0.2034
'cub'	1	0.333	0.1992	0.2017							2	0.3262	0.2035	0.2024							3	0.336	0.2021	0.2026							4	0.3376	0.1971	0.2013							5	0.3408	0.2054	0.1992
'cub'	1	0.3271	0.2	0.2037							2	0.321	0.197	0.2032							3	0.3271	0.1957	0.1963							4	0.332	0.2078	0.2056							5	0.3323	0.1991	0.1953
'cub'	1	0.3235	0.1969	0.2017							2	0.3147	0.2012	0.1971							3	0.32	0.2012	0.2009							4	0.3281	0.2018	0.1984							5	0.3298	0.205	0.2034
'cub'	1	0.3171	0.2009	0.1981							2	0.3047	0.201	0.2048							3	0.312	0.2026	0.2029							4	0.3147	0.1998	0.1967							5	0.3213	0.1985	0.2006
'cub'	1	0.3093	0.197	0.2028							2	0.2964	0.1985	0.2037							3	0.3032	0.2012	0.2048							4	0.308	0.2032	0.2046							5	0.3171	0.1984	0.2026
'flower'	1	0.2031	0.2091	0.2163							2	0.2036	0.211	0.223							3	0.2076	0.2156	0.2238							4	0.2087	0.2148	0.2238							5	0.2035	0.2085	0.217
'flower'	1	0.2087	0.2205	0.2433							2	0.2103	0.2279	0.2542							3	0.2144	0.228	0.2532							4	0.2142	0.2261	0.249							5	0.2078	0.22	0.243
'flower'	1	0.2147	0.237	0.273							2	0.2173	0.2437	0.283							3	0.2211	0.2452	0.281							4	0.2198	0.242	0.2798							5	0.213	0.2374	0.2734
'flower'	1	0.2201	0.2527	0.3042							2	0.2263	0.2634	0.3137							3	0.2281	0.2625	0.3086							4	0.2249	0.2585	0.31							5	0.2188	0.255	0.306
'flower'	1	0.2272	0.2695	0.3313							2	0.2327	0.2812	0.3396							3	0.2378	0.278	0.3354							4	0.2318	0.2764	0.3413							5	0.226	0.2705	0.333
'flower'	1	0.2356	0.2869	0.3582							2	0.2404	0.2988	0.3672							3	0.243	0.2957	0.359							4	0.238	0.2932	0.3667							5	0.2345	0.2886	0.3594
'flower'	1	0.2439	0.3027	0.3809							2	0.2491	0.3145	0.3862							3	0.2505	0.3127	0.3794							4	0.2451	0.3105	0.3884							5	0.244	0.307	0.3813
'flower'	1	0.251	0.3215	0.4023							2	0.2568	0.3318	0.4023							3	0.2563	0.328	0.3987							4	0.2524	0.329	0.4102							5	0.2515	0.3232	0.4006
'flower'	1	0.2573	0.3389	0.4204							2	0.2664	0.3467	0.4197							3	0.2642	0.3428	0.414							4	0.261	0.3464	0.426							5	0.2605	0.3374	0.4187
'flower'	1	0.2637	0.3518	0.4324							2	0.273	0.3618	0.435							3	0.2717	0.356	0.4287							4	0.269	0.363	0.4355							5	0.2666	0.3518	0.4321
'flower'	1	0.3357	0.4448	0.4883							2	0.3447	0.4468	0.4946							3	0.3347	0.442	0.489							4	0.3347	0.4512	0.493							5	0.3325	0.4514	0.4937
'flower'	1	0.3818	0.479	0.501							2	0.388	0.4822	0.5117							3	0.3792	0.475	0.504							4	0.3813	0.484	0.511							5	0.379	0.487	0.5127
'flower'	1	0.4106	0.493	0.5093							2	0.41	0.4988	0.519							3	0.4058	0.4897	0.511							4	0.407	0.4988	0.5186							5	0.4082	0.5	0.519
'flower'	1	0.428	0.499	0.5137							2	0.424	0.5054	0.525							3	0.4224	0.503	0.5117							4	0.4226	0.5083	0.5205							5	0.428	0.51	0.5186
'flower'	1	0.44	0.5054	0.515							2	0.4385	0.51	0.5273							3	0.436	0.5083	0.5137							4	0.4363	0.514	0.5215							5	0.4395	0.5137	0.5225
'flower'	1	0.448	0.5083	0.5166							2	0.4495	0.5166	0.5303							3	0.4434	0.5103	0.514							4	0.444	0.5166	0.5234							5	0.447	0.5166	0.5254
'flower'	1	0.455	0.511	0.5166							2	0.4585	0.5195	0.5312							3	0.453	0.5117	0.515							4	0.451	0.5195	0.524							5	0.455	0.518	0.528
'flower'	1	0.4592	0.5127	0.5176							2	0.4636	0.524	0.5312							3	0.4575	0.512	0.515							4	0.4578	0.519	0.524							5	0.4607	0.52	0.5283
'flower'	1	0.463	0.515	0.52							2	0.4688	0.526	0.533							3	0.463	0.5137	0.517							4	0.4626	0.522	0.5244							5	0.463	0.5234	0.5293
'flower'	1	0.4805	0.5244	0.525							2	0.487	0.5356	0.54							3	0.4805	0.519	0.5205							4	0.4883	0.526	0.5317							5	0.4883	0.53	0.534
'flower'	1	0.488	0.5273	0.5273							2	0.4954	0.5415	0.5444							3	0.4895	0.524	0.521							4	0.4968	0.531	0.533							5	0.4932	0.5337	0.5376
'flower'	1	0.4934	0.526	0.527							2	0.5044	0.548	0.5454							3	0.496	0.528	0.524							4	0.504	0.534	0.5356							5	0.4995	0.5376	0.538
'flower'	1	0.4995	0.527	0.524							2	0.513	0.551	0.5454							3	0.5015	0.5244	0.5283							4	0.508	0.5356	0.5386							5	0.5073	0.537	0.54
'flower'	1	0.503	0.5317	0.5254							2	0.5205	0.551	0.5474							3	0.509	0.5244	0.5293							4	0.511	0.5386	0.543							5	0.514	0.539	0.543
'flower'	1	0.5063	0.527	0.5293							2	0.523	0.559	0.5513							3	0.5093	0.5293	0.5293							4	0.514	0.541	0.537							5	0.522	0.544	0.5464
'flower'	1	0.508	0.531	0.5254							2	0.526	0.557	0.5566							3	0.511	0.5366	0.5293							4	0.5176	0.5386	0.544							5	0.5205	0.546	0.5405
'flower'	1	0.508	0.527	0.531							2	0.528	0.556	0.547							3	0.511	0.5317	0.524							4	0.5186	0.5425	0.5405							5	0.519	0.5454	0.5312
'flower'	1	0.5083	0.5283	0.528							2	0.5283	0.554	0.5493							3	0.5107	0.543	0.529							4	0.5195	0.541	0.54							5	0.5205	0.544	0.5396
'flower'	1	0.4954	0.4592	0.4626							2	0.522	0.477	0.4863							3	0.4983	0.4622	0.4697							4	0.5166	0.479	0.492							5	0.514	0.4912	0.518
'flower'	1	0.4841	0.2343	0.2861							2	0.512	0.24	0.2915							3	0.4863	0.2327	0.2913							4	0.5107	0.2417	0.2625							5	0.509	0.2551	0.3066
'flower'	1	0.475	0.2145	0.2296							2	0.502	0.2017	0.2174							3	0.4785	0.2034	0.2164							4	0.504	0.2051	0.2158							5	0.4954	0.2085	0.2325
'flower'	1	0.4622	0.202	0.2186							2	0.486	0.1993	0.2014							3	0.473	0.2035	0.2153							4	0.4937	0.2004	0.2163							5	0.482	0.2067	0.2092
'flower'	1	0.4534	0.1985	0.2097							2	0.4773	0.1986	0.2025							3	0.4614	0.2063	0.2008							4	0.4836	0.2065	0.2104							5	0.4702	0.2028	0.2006
'flower'	1	0.444	0.2063	0.2037							2	0.4656	0.2023	0.2013							3	0.4487	0.2004	0.201							4	0.4766	0.2058	0.21							5	0.4624	0.2036	0.1981
'flower'	1	0.4353	0.2023	0.1991							2	0.45	0.2025	0.1919							3	0.438	0.204	0.202							4	0.462	0.2	0.1967							5	0.4453	0.2039	0.196
'flower'	1	0.4204	0.1985	0.199							2	0.442	0.2086	0.1991							3	0.4312	0.1967	0.1959							4	0.4524	0.1985	0.1982							5	0.4385	0.2017	0.1997
'flower'	1	0.4104	0.2001	0.1992							2	0.4343	0.1981	0.196							3	0.4214	0.199	0.205							4	0.4385	0.1941	0.1993							5	0.4248	0.1995	0.2078
'mini'	1	0.2134	0.2206	0.2302							2	0.21	0.216	0.223							3	0.2041	0.2092	0.2185							4	0.2081	0.2134	0.2216							5	0.2113	0.2167	0.2249
'mini'	1	0.2213	0.2345	0.252							2	0.2153	0.228	0.2476							3	0.21	0.2231	0.2443							4	0.2134	0.2258	0.2456							5	0.2162	0.2283	0.2452
'mini'	1	0.2253	0.248	0.2773							2	0.22	0.2437	0.272							3	0.2153	0.2397	0.268							4	0.2194	0.2386	0.2651							5	0.2225	0.2416	0.274
'mini'	1	0.2324	0.259	0.2969							2	0.2273	0.257	0.2954							3	0.2229	0.2527	0.289							4	0.225	0.2512	0.2864							5	0.2278	0.2542	0.2964
'mini'	1	0.2389	0.2744	0.319							2	0.2325	0.272	0.316							3	0.2291	0.2678	0.3127							4	0.2295	0.2654	0.3132							5	0.2338	0.2715	0.3196
'mini'	1	0.2432	0.2864	0.3406							2	0.2389	0.2856	0.3352							3	0.2351	0.28	0.3325							4	0.2347	0.2756	0.3323							5	0.2393	0.2861	0.3381
'mini'	1	0.2496	0.2974	0.3596							2	0.2451	0.2983	0.3535							3	0.2423	0.2925	0.3489							4	0.242	0.2883	0.351							5	0.2449	0.3005	0.3599
'mini'	1	0.2551	0.3115	0.3743							2	0.252	0.3113	0.3691							3	0.2474	0.3062	0.3635							4	0.2476	0.301	0.367							5	0.252	0.3125	0.3745
'mini'	1	0.2612	0.3267	0.3894							2	0.2595	0.3242	0.3823							3	0.254	0.3203	0.3772							4	0.2512	0.3152	0.3794							5	0.2605	0.3247	0.3855
'mini'	1	0.2664	0.3398	0.4							2	0.2654	0.336	0.393							3	0.2603	0.3315	0.384							4	0.257	0.328	0.387							5	0.2668	0.3384	0.3955
'mini'	1	0.3167	0.4082	0.439							2	0.319	0.407	0.4363							3	0.3132	0.398	0.4253							4	0.307	0.4	0.4368							5	0.3196	0.408	0.4353
'mini'	1	0.3523	0.4314	0.4485							2	0.3489	0.4294	0.4446							3	0.345	0.4194	0.438							4	0.349	0.4282	0.449							5	0.355	0.4275	0.4436
'mini'	1	0.3733	0.444	0.4543							2	0.3694	0.4414	0.4492							3	0.366	0.4304	0.4434							4	0.3733	0.4443	0.4526							5	0.3745	0.4382	0.4478
'mini'	1	0.387	0.4485	0.455							2	0.3877	0.4478	0.4517							3	0.38	0.437	0.4463							4	0.3887	0.4521	0.4548							5	0.3906	0.4429	0.4517
'mini'	1	0.3984	0.4517	0.4578							2	0.3977	0.45	0.4539							3	0.3916	0.4414	0.4495							4	0.3977	0.454	0.455							5	0.3982	0.4473	0.4536
'mini'	1	0.4055	0.4536	0.4587							2	0.4043	0.4521	0.4546							3	0.3997	0.443	0.4514							4	0.4033	0.4546	0.4568							5	0.405	0.449	0.4546
'mini'	1	0.4114	0.4558	0.4597							2	0.41	0.453	0.4546							3	0.4053	0.4458	0.4514							4	0.4087	0.457	0.4592							5	0.4106	0.452	0.4556
'mini'	1	0.4167	0.4595	0.461							2	0.4143	0.4546	0.4573							3	0.4084	0.4487	0.4534							4	0.4146	0.4585	0.4597							5	0.415	0.453	0.4546
'mini'	1	0.4214	0.459	0.4631							2	0.4175	0.457	0.4573							3	0.4116	0.4492	0.4543							4	0.4194	0.4585	0.4604							5	0.4185	0.455	0.4546
'mini'	1	0.4368	0.4644	0.4688							2	0.4324	0.4614	0.46							3	0.4294	0.4531	0.4556							4	0.4333	0.467	0.4678							5	0.433	0.4573	0.4575
'mini'	1	0.4434	0.4688	0.4683							2	0.4387	0.4648	0.4663							3	0.4346	0.4563	0.4565							4	0.4417	0.4717	0.4685							5	0.4402	0.458	0.4602
'mini'	1	0.4492	0.4697	0.4634							2	0.443	0.4658	0.4666							3	0.443	0.456	0.4548							4	0.4504	0.469	0.466							5	0.4443	0.4556	0.4604
'mini'	1	0.4558	0.464	0.4612							2	0.4492	0.4639	0.4658							3	0.446	0.4548	0.4568							4	0.4592	0.4683	0.4656							5	0.4482	0.4558	0.4612
'mini'	1	0.4585	0.4597	0.4612							2	0.4558	0.4587	0.465							3	0.4502	0.4539	0.4563							4	0.4648	0.4717	0.4663							5	0.453	0.4568	0.4592
'mini'	1	0.4634	0.456	0.4558							2	0.459	0.4575	0.4531							3	0.4524	0.4521	0.4492							4	0.47	0.46	0.4653							5	0.457	0.4531	0.4548
'mini'	1	0.4656	0.4473	0.4512							2	0.4622	0.449	0.4512							3	0.454	0.4521	0.4517							4	0.471	0.4617	0.4565							5	0.46	0.4465	0.4475
'mini'	1	0.4646	0.4385	0.4443							2	0.4658	0.4446	0.4392							3	0.4536	0.4446	0.4395							4	0.47	0.4583	0.452							5	0.4604	0.4373	0.4414
'mini'	1	0.4646	0.4395	0.4312							2	0.468	0.4255	0.433							3	0.4524	0.4397	0.439							4	0.4695	0.4453	0.4492							5	0.4614	0.4373	0.4348
'mini'	1	0.457	0.3152	0.3691							2	0.4692	0.3318	0.3538							3	0.4531	0.321	0.3716							4	0.4734	0.3313	0.3728							5	0.455	0.328	0.3662
'mini'	1	0.454	0.233	0.2488							2	0.4644	0.2266	0.2405							3	0.4517	0.2198	0.2472							4	0.4656	0.2173	0.2484							5	0.447	0.2266	0.2426
'mini'	1	0.4468	0.2024	0.2181							2	0.4536	0.2051	0.2188							3	0.4463	0.2048	0.2234							4	0.4573	0.1974	0.2031							5	0.441	0.1976	0.2139
'mini'	1	0.4358	0.1998	0.2109							2	0.4492	0.2043	0.2106							3	0.4414	0.2065	0.2064							4	0.4463	0.198	0.2017							5	0.43	0.2021	0.2073
'mini'	1	0.4246	0.2012	0.204							2	0.439	0.2035	0.2056							3	0.4326	0.2035	0.2036							4	0.4373	0.1984	0.2078							5	0.427	0.2012	0.1985
'mini'	1	0.413	0.1976	0.2069							2	0.4265	0.198	0.2017							3	0.4197	0.1978	0.1998							4	0.4255	0.1986	0.2031							5	0.416	0.2032	0.2018
'mini'	1	0.4038	0.1979	0.1984							2	0.4128	0.2051	0.2019							3	0.4067	0.2013	0.2012							4	0.4153	0.2021	0.1981							5	0.406	0.2025	0.1998
'mini'	1	0.3928	0.1959	0.2087							2	0.3994	0.198	0.2058							3	0.3982	0.2047	0.199							4	0.4053	0.2042	0.1998							5	0.401	0.2058	0.1997
'mini'	1	0.3818	0.1982	0.2063							2	0.3765	0.2017	0.2041							3	0.3958	0.2063	0.2024							4	0.3914	0.2017	0.1998							5	0.394	0.204	0.1964
'traffic'	1	0.2163	0.2211	0.2289							2	0.2052	0.2085	0.2156							3	0.2013	0.205	0.2083							4	0.218	0.2251	0.2322							5	0.2004	0.2062	0.2142
'traffic'	1	0.2216	0.2328	0.251							2	0.2091	0.2194	0.24							3	0.204	0.2115	0.228							4	0.2246	0.236	0.2522							5	0.2047	0.2163	0.2316
'traffic'	1	0.2273	0.2462	0.2727							2	0.2135	0.2347	0.2637							3	0.2084	0.2214	0.2471							4	0.2302	0.2471	0.276							5	0.209	0.2275	0.2551
'traffic'	1	0.2328	0.2585	0.297							2	0.2196	0.25	0.29							3	0.2106	0.2346	0.271							4	0.2347	0.2617	0.3015							5	0.2144	0.2395	0.2827
'traffic'	1	0.2368	0.2715	0.3206							2	0.228	0.264	0.313							3	0.2156	0.2477	0.2917							4	0.24	0.275	0.3215							5	0.2197	0.2544	0.3071
'traffic'	1	0.2441	0.288	0.3403							2	0.2344	0.2778	0.332							3	0.2208	0.261	0.3162							4	0.2458	0.291	0.338							5	0.2253	0.2715	0.3296
'traffic'	1	0.25	0.301	0.354							2	0.2408	0.2937	0.3484							3	0.2272	0.2756	0.3315							4	0.2522	0.3054	0.3508							5	0.2303	0.2876	0.3457
'traffic'	1	0.254	0.3135	0.366							2	0.2462	0.3074	0.364							3	0.2335	0.2893	0.3425							4	0.2585	0.316	0.3594							5	0.2368	0.3035	0.3591
'traffic'	1	0.2607	0.3271	0.3743							2	0.2527	0.322	0.372							3	0.2386	0.3025	0.352							4	0.2668	0.3267	0.3691							5	0.2438	0.3162	0.37
'traffic'	1	0.2659	0.3376	0.3796							2	0.261	0.3315	0.3818							3	0.2462	0.3152	0.3633							4	0.273	0.3342	0.375							5	0.2498	0.3306	0.3809
'traffic'	1	0.3262	0.3955	0.4226							2	0.3198	0.3938	0.4182							3	0.2966	0.3726	0.4036							4	0.3242	0.3855	0.4072							5	0.3176	0.392	0.421
'traffic'	1	0.362	0.4163	0.433							2	0.3562	0.411	0.4233							3	0.334	0.3997	0.4172							4	0.355	0.4	0.4182							5	0.3564	0.4143	0.428
'traffic'	1	0.3818	0.426	0.437							2	0.3765	0.4187	0.4236							3	0.3545	0.4087	0.423							4	0.37	0.4128	0.418							5	0.3762	0.4236	0.43
'traffic'	1	0.3933	0.4302	0.4375							2	0.3875	0.423	0.4263							3	0.3655	0.414	0.424							4	0.3782	0.4148	0.4211							5	0.387	0.427	0.433
'traffic'	1	0.4011	0.4343	0.4377							2	0.3953	0.425	0.4294							3	0.3726	0.4182	0.4246							4	0.3853	0.417	0.4229							5	0.3938	0.4294	0.434
'traffic'	1	0.4077	0.4365	0.438							2	0.398	0.425	0.4304							3	0.3806	0.4202	0.4248							4	0.3916	0.4207	0.4214							5	0.398	0.428	0.435
'traffic'	1	0.4124	0.4375	0.4365							2	0.4006	0.4253	0.4304							3	0.3853	0.4207	0.4248							4	0.3945	0.4194	0.4214							5	0.4011	0.4312	0.434
'traffic'	1	0.4172	0.4363	0.4358							2	0.4014	0.4282	0.4324							3	0.3894	0.4192	0.4248							4	0.3987	0.4224	0.4224							5	0.4043	0.4324	0.4353
'traffic'	1	0.418	0.4392	0.4375							2	0.4028	0.428	0.4316							3	0.3923	0.42	0.4263							4	0.3997	0.4204	0.4226							5	0.4075	0.4324	0.437
'traffic'	1	0.4294	0.4424	0.4424							2	0.4146	0.4333	0.4377							3	0.4011	0.4238	0.4272							4	0.405	0.4211	0.423							5	0.417	0.434	0.4382
'traffic'	1	0.4358	0.4453	0.45							2	0.417	0.4363	0.4373							3	0.4062	0.4312	0.4329							4	0.4104	0.4255	0.4226							5	0.4229	0.431	0.4404
'traffic'	1	0.439	0.446	0.449							2	0.4172	0.433	0.436							3	0.4084	0.4297	0.433							4	0.4138	0.4263	0.4253							5	0.426	0.436	0.4397
'traffic'	1	0.44	0.4502	0.4473							2	0.423	0.4346	0.4355							3	0.414	0.433	0.4253							4	0.4148	0.4265	0.4229							5	0.4324	0.4377	0.4373
'traffic'	1	0.4426	0.4502	0.4438							2	0.4297	0.432	0.4343							3	0.4175	0.4297	0.4204							4	0.4158	0.4263	0.427							5	0.4353	0.433	0.4336
'traffic'	1	0.4436	0.4502	0.4397							2	0.4324	0.4326	0.4292							3	0.4167	0.4304	0.4243							4	0.4167	0.423	0.4194							5	0.4373	0.4292	0.4265
'traffic'	1	0.4443	0.4421	0.4321							2	0.4316	0.4246	0.4272							3	0.4185	0.4268	0.407							4	0.419	0.4185	0.4214							5	0.4363	0.4333	0.4275
'traffic'	1	0.444	0.432	0.423							2	0.4321	0.4282	0.4187							3	0.4229	0.4128	0.4106							4	0.4187	0.4172	0.4084							5	0.4346	0.4282	0.4136
'traffic'	1	0.4438	0.4346	0.423							2	0.4338	0.4163	0.4067							3	0.4246	0.4065	0.401							4	0.417	0.41	0.4055							5	0.4338	0.4167	0.4163
'traffic'	1	0.4312	0.3496	0.3298							2	0.4258	0.3384	0.3572							3	0.4055	0.3274	0.3328							4	0.3997	0.3372	0.3428							5	0.4167	0.339	0.3457
'traffic'	1	0.4028	0.2133	0.2404							2	0.402	0.2178	0.222							3	0.3813	0.2065	0.2177							4	0.3813	0.2047	0.2416							5	0.405	0.2053	0.2256
'traffic'	1	0.3743	0.2017	0.2085							2	0.3838	0.2008	0.2125							3	0.3677	0.1974	0.2196							4	0.3638	0.2054	0.2096							5	0.3865	0.1997	0.2072
'traffic'	1	0.3552	0.2003	0.2048							2	0.3623	0.2025	0.2034							3	0.3376	0.2094	0.2053							4	0.336	0.2051	0.2076							5	0.3616	0.196	0.2046
'traffic'	1	0.3284	0.206	0.2028							2	0.3418	0.2025	0.1992							3	0.3147	0.1997	0.2031							4	0.3066	0.2028	0.2024							5	0.3364	0.2048	0.2094
'traffic'	1	0.3086	0.2003	0.1991							2	0.3325	0.1991	0.2008							3	0.2915	0.2028	0.2051							4	0.2954	0.2017	0.1981							5	0.322	0.1995	0.1953
'traffic'	1	0.281	0.1976	0.2048							2	0.3142	0.2009	0.2073							3	0.2852	0.2007	0.1984							4	0.2827	0.1981	0.2004							5	0.3115	0.1969	0.2024
'traffic'	1	0.2693	0.2014	0.1998							2	0.2935	0.2028	0.2046							3	0.2764	0.1984	0.1917							4	0.272	0.1992	0.2031							5	0.2917	0.1998	0.2025
'traffic'	1	0.2654	0.2024	0.1978							2	0.2896	0.1985	0.2009							3	0.2725	0.2037	0.2001							4	0.2686	0.2008	0.2032							5	0.2812	0.2006	0.2086
