# Supplementary material
Source: ML conference proceedings conference paper supplement (https://openreview.net/forum?id=qkLMTphG5-h)
Supplement: supplementary_material [file 5way_1shot_SGD_UFGSM.xlsx]

## Sheet: 5way_1shot_SGD_UFGSM
		UFGSM	I/UFGSM	FGSM		Average	UFGSM	I/UFGSM	FGSM			UFGSM	I/UFGSM	FGSM		Average	UFGSM	I/UFGSM	FGSM			UFGSM	I/UFGSM	FGSM		Average	UFGSM	I/UFGSM	FGSM			UFGSM	I/UFGSM	FGSM		Average	UFGSM	I/UFGSM	FGSM					UFGSM	I/UFGSM	FGSM		Average	UFGSM
'cub'	1	0.2172	0.2178	0.2181		'cub'	0.314024	0.305497	0.303022		2	0.2063	0.2062	0.2058		'cub'	0.302078	0.294419	0.29223		5	0.2052	0.2053	0.2053		'cub'	0.314108	0.309073	0.307343		222	0.2076	0.2078	0.2083		'cub'	0.312562	0.301757	0.299297			'cub'	0.0001	0.209075	0.209275	0.209375		'cub'	0.310693
'cub'	1	0.2211	0.2207	0.2202		'flower'	0.414035	0.405946	0.403662		2	0.2097	0.208	0.2079		'flower'	0.426349	0.417527	0.414865		5	0.2094	0.2087	0.2091		'flower'	0.422841	0.413035	0.409978		222	0.2115	0.2113	0.2112		'flower'	0.430127	0.420951	0.418392			'cub'	0.0002	0.212925	0.212175	0.2121		'flower'	0.423338
'cub'	1	0.2223	0.2223	0.2231		'mini'	0.388686	0.37353	0.370797		2	0.2128	0.2112	0.2103		'mini'	0.387727	0.3739	0.372		5	0.2128	0.2124	0.2123		'mini'	0.382449	0.364032	0.360805		222	0.2157	0.2153	0.215		'mini'	0.389505	0.37837	0.375327			'cub'	0.0003	0.2159	0.2153	0.215175		'mini'	0.387092
'cub'	1	0.2255	0.2264	0.2257		'traffic'	0.36297	0.351781	0.349243		2	0.2155	0.2144	0.214		'traffic'	0.35733	0.348038	0.346019		5	0.2174	0.217	0.2179		'traffic'	0.355657	0.342903	0.3411		222	0.2196	0.2192	0.2197		'traffic'	0.367905	0.356486	0.354914			'cub'	0.0004	0.2195	0.21925	0.219325		'traffic'	0.360966
'cub'	1	0.2301	0.2288	0.2278		Average	0.369929	0.359189	0.356681		2	0.2198	0.2185	0.2185		Average	0.368371	0.358471	0.356278		5	0.2225	0.224	0.2234		Average	0.368764	0.357261	0.354807		222	0.2238	0.2241	0.2236		Average	0.375025	0.364391	0.361982			'cub'	0.0005	0.22405	0.22385	0.223325		Average	0.370522
'cub'	1	0.234	0.2328	0.2322							2	0.2219	0.2213	0.2202							5	0.2273	0.2288	0.2275							222	0.2286	0.2278	0.2267								'cub'	0.0006	0.22795	0.227675	0.22665
'cub'	1	0.2375	0.2384	0.2373							2	0.2257	0.2251	0.2251							5	0.233	0.234	0.2329							222	0.2314	0.2297	0.2285								'cub'	0.0007	0.2319	0.2318	0.23095
'cub'	1	0.2416	0.2428	0.2427		Top1 Acc.	UFGSM	I/UFGSM	FGSM		2	0.2296	0.2285	0.2292		Top1 Acc.	UFGSM	I/UFGSM	FGSM		5	0.2369	0.2373	0.2366		Top1 Acc.	UFGSM	I/UFGSM	FGSM		222	0.2369	0.2344	0.2338		Top1 Acc.	UFGSM	I/UFGSM	FGSM			'cub'	0.0008	0.23625	0.23575	0.235575		Top1 Acc.	UFGSM
'cub'	1	0.2487	0.2483	0.2472		'cub'	0.3596	0.3489	0.3457		2	0.233	0.2312	0.2316		'cub'	0.3528	0.336	0.3342		5	0.2439	0.2434	0.2426		'cub'	0.366	0.3577	0.355		222	0.2407	0.2407	0.2399		'cub'	0.3623	0.348	0.346			'cub'	0.0009	0.241575	0.2409	0.240325		'cub'	0.360175
'cub'	1	0.2532	0.2507	0.251		'flower'	0.511	0.495	0.4934		2	0.2358	0.2338	0.2346		'flower'	0.5293	0.5156	0.513		5	0.2474	0.2496	0.2488		'flower'	0.5215	0.5083	0.504		222	0.2476	0.2439	0.2426		'flower'	0.5303	0.517	0.5146			'cub'	0.001	0.246	0.2445	0.24425		'flower'	0.523025
'cub'	1	0.288	0.2957	0.293		'mini'	0.4695	0.446	0.4426		2	0.2693	0.2744	0.2727		'mini'	0.466	0.4456	0.4424		5	0.2847	0.2935	0.2927		'mini'	0.4548	0.4287	0.425		222	0.288	0.2898	0.288		'mini'	0.476	0.452	0.4473			'cub'	0.002	0.2825	0.28835	0.2866		'mini'	0.466575
'cub'	1	0.3147	0.3179	0.316		'traffic'	0.442	0.4321	0.4294		2	0.2917	0.3022	0.3008		'traffic'	0.4343	0.4238	0.4229		5	0.314	0.3232	0.3228		'traffic'	0.433	0.4155	0.4126		222	0.3086	0.3132	0.3086		'traffic'	0.449	0.4414	0.44			'cub'	0.003	0.30725	0.314125	0.31205		'traffic'	0.439575
'cub'	1	0.328	0.3271	0.3271		Average	0.445525	0.4305	0.427775		2	0.3062	0.3105	0.308		Average	0.4456	0.43025	0.428125		5	0.33	0.3342	0.335		Average	0.443825	0.42755	0.42415		222	0.325	0.3206	0.3184		Average	0.4544	0.4396	0.436975			'cub'	0.004	0.3223	0.3231	0.322125		Average	0.447337
'cub'	1	0.3367	0.3318	0.331							2	0.3147	0.3198	0.317							5	0.3364	0.343	0.3413							222	0.3325	0.3298	0.3252								'cub'	0.005	0.330075	0.3311	0.328625
'cub'	1	0.3403	0.3354	0.3325							2	0.3215	0.3254	0.3206							5	0.3384	0.346	0.3433							222	0.3384	0.3333	0.331								'cub'	0.006	0.33465	0.335025	0.33185
'cub'	1	0.343	0.3372	0.333		Top-N%	UFGSM	I/UFGSM	FGSM		2	0.3254	0.3262	0.3242		Top-N%	UFGSM	I/UFGSM	FGSM		5	0.343	0.346	0.3445		Top-N%	UFGSM	I/UFGSM	FGSM		222	0.342	0.3362	0.3335		Top-N%	UFGSM	I/UFGSM	FGSM			'cub'	0.007	0.33835	0.3364	0.3338		Top-N%	UFGSM
'cub'	1	0.346	0.3394	0.3342		'cub'	0.353869	0.34306	0.339588		2	0.3296	0.331	0.327		'cub'	0.345053	0.331193	0.32774		5	0.345	0.3489	0.3442		'cub'	0.357669	0.3511	0.348933		222	0.3447	0.3376	0.3364		'cub'	0.355547	0.3425	0.33898			'cub'	0.008	0.341325	0.339225	0.33545		'cub'	0.353034
'cub'	1	0.346	0.3406	0.337		'flower'	0.49974	0.48676	0.483973		2	0.3303	0.3313	0.3281		'flower'	0.51536	0.502193	0.499267		5	0.3457	0.3472	0.3467		'flower'	0.510593	0.497867	0.49374		222	0.3452	0.341	0.3372		'flower'	0.517033	0.504887	0.502007			'cub'	0.009	0.3418	0.340025	0.33725		'flower'	0.510682
'cub'	1	0.346	0.3413	0.3381		'mini'	0.459833	0.438393	0.43382		2	0.3318	0.3335	0.3293		'mini'	0.458607	0.436507	0.433253		5	0.3457	0.349	0.3474		'mini'	0.447627	0.42214	0.418093		222	0.3457	0.343	0.3389		'mini'	0.464393	0.446827	0.44206			'cub'	0.01	0.3423	0.3417	0.338425		'mini'	0.457615
'cub'	1	0.3503	0.3447	0.343		'traffic'	0.433327	0.423	0.420867		2	0.3354	0.3342	0.3342		'traffic'	0.42536	0.416487	0.414953		5	0.3523	0.3523	0.3506		'traffic'	0.425333	0.41202	0.40818		222	0.3525	0.3438	0.3418		'traffic'	0.443107	0.435213	0.43278			'cub'	0.02	0.347625	0.34375	0.3424		'traffic'	0.431782
'cub'	1	0.3533	0.3489	0.3455		Average	0.436692	0.422803	0.419562		2	0.3406	0.3357	0.332		Average	0.436095	0.421595	0.418803		5	0.3574	0.3533	0.353		Average	0.435306	0.420782	0.417237		222	0.354	0.348	0.346		Average	0.44502	0.432357	0.428957			'cub'	0.03	0.351325	0.346475	0.344125		Average	0.438278
'cub'	1	0.3542	0.3489	0.3457							2	0.3433	0.336	0.331							5	0.36	0.3545	0.3538							222	0.355	0.3477	0.343								'cub'	0.04	0.353125	0.346775	0.343375
'cub'	1	0.3557	0.346	0.3433							2	0.3462	0.3345	0.3313							5	0.3635	0.3577	0.355							222	0.3596	0.3464	0.3435								'cub'	0.05	0.35625	0.34615	0.343275
'cub'	1	0.357	0.3447	0.343		15					2	0.3486	0.334	0.33							5	0.366	0.3574	0.353							222	0.3591	0.348	0.3423								'cub'	0.06	0.357675	0.346025	0.342075
'cub'	1	0.3591	0.3464	0.3428		'cub'	0.346	0.336	0.3325		2	0.35	0.335	0.3276		'cub'	0.333	0.3228	0.3206		5	0.3657	0.3542	0.3523		'cub'	0.3457	0.3455	0.3423		222	0.3618	0.3462	0.3435		'cub'	0.3457	0.3333	0.3303			'cub'	0.07	0.35915	0.34545	0.34155		'cub'	0.3426
'cub'	1	0.3572	0.344	0.3425		'flower'	0.484	0.474	0.471		2	0.3499	0.331	0.3274		'flower'	0.4924	0.4834	0.4807		5	0.3657	0.352	0.35		'flower'	0.4895	0.4846	0.479		222	0.361	0.346	0.3418		'flower'	0.4963	0.488	0.4841			'cub'	0.08	0.35845	0.34325	0.340425		'flower'	0.49055
'cub'	1	0.357	0.3452	0.343		'mini'	0.4429	0.4265	0.4229		2	0.3489	0.3284	0.3264		'mini'	0.4438	0.4258	0.4246		5	0.3657	0.35	0.349		'mini'	0.4363	0.414	0.4097		222	0.3623	0.3428	0.3381		'mini'	0.447	0.4358	0.435			'cub'	0.09	0.358475	0.3416	0.339125		'mini'	0.4425
'cub'	1	0.3577	0.345	0.3406		'traffic'	0.4197	0.4111	0.4114		2	0.349	0.3289	0.326		'traffic'	0.4146	0.408	0.405		5	0.3645	0.3525	0.3489		'traffic'	0.4163	0.4065	0.401		222	0.3608	0.3428	0.3374		'traffic'	0.431	0.426	0.4216			'cub'	0.1	0.358	0.3423	0.338225		'traffic'	0.4204
'cub'	1	0.3596	0.3376	0.3367		Average	0.42315	0.4119	0.40945		2	0.3528	0.3228	0.3203		Average	0.42095	0.41	0.407725		5	0.3635	0.3455	0.3423		Average	0.42195	0.41265	0.408		222	0.358	0.3347	0.3303		Average	0.43	0.420775	0.41775			'cub'	0.2	0.358475	0.33515	0.3324		Average	0.424013
'cub'	1	0.3567	0.336	0.3325							2	0.3499	0.322	0.321							5	0.3557	0.339	0.3357							222	0.355	0.3289	0.3257								'cub'	0.3	0.354325	0.331475	0.328725
'cub'	1	0.3545	0.332	0.3267							2	0.347	0.3167	0.318							5	0.3533	0.3345	0.3333							222	0.3508	0.3262	0.3257								'cub'	0.4	0.3514	0.32735	0.325925
'cub'	1	0.3516	0.3245	0.3257							2	0.3455	0.3174	0.3157							5	0.35	0.3325	0.3254							222	0.3477	0.3223	0.3176								'cub'	0.5	0.3487	0.324175	0.3211
'cub'	1	0.3455	0.321	0.3208							2	0.3357	0.318	0.3137							5	0.348	0.3284	0.3242							222	0.3499	0.319	0.3154								'cub'	0.6	0.344775	0.3216	0.318525
'cub'	1	0.3416	0.3208	0.308							2	0.333	0.3184	0.3167							5	0.3425	0.3264	0.3237							222	0.3406	0.316	0.3118								'cub'	0.7	0.339425	0.3204	0.31505
'cub'	1	0.332	0.3137	0.3079							2	0.328	0.315	0.3125							5	0.3376	0.3225	0.3145							222	0.3403	0.304	0.3074								'cub'	0.8	0.334475	0.3138	0.310575
'cub'	1	0.331	0.3044	0.2993							2	0.3271	0.3108	0.3086							5	0.3372	0.317	0.3167							222	0.3345	0.302	0.3018								'cub'	0.9	0.33245	0.30855	0.3066
'cub'	1	0.325	0.3042	0.2976							2	0.3154	0.3022	0.2952							5	0.3347	0.3145	0.316							222	0.3284	0.3015	0.2944								'cub'	1	0.325875	0.3056	0.3008
'flower'	1	0.2047	0.2047	0.2048							2	0.2043	0.2037	0.2036							5	0.2047	0.2032	0.2032							222	0.2133	0.2126	0.2125								'flower'	0.0001	0.20675	0.20605	0.206025
'flower'	1	0.211	0.211	0.2109							2	0.2141	0.2148	0.2145							5	0.2113	0.21	0.2096							222	0.222	0.2217	0.2213								'flower'	0.0002	0.2146	0.214375	0.214075
'flower'	1	0.218	0.2169	0.216							2	0.2229	0.224	0.2238							5	0.2185	0.2167	0.2162							222	0.2306	0.2303	0.2297								'flower'	0.0003	0.2225	0.221975	0.221425
'flower'	1	0.2274	0.2266	0.2261							2	0.2324	0.2343	0.2339							5	0.2267	0.2263	0.226							222	0.2416	0.2399	0.2399								'flower'	0.0004	0.232025	0.231775	0.231475
'flower'	1	0.2366	0.237	0.2355							2	0.2441	0.2461	0.2445							5	0.2375	0.2356	0.2351							222	0.2517	0.2498	0.2484								'flower'	0.0005	0.242475	0.242125	0.240875
'flower'	1	0.2465	0.247	0.246							2	0.2556	0.2566	0.2566							5	0.2489	0.247	0.2454							222	0.261	0.2595	0.2583								'flower'	0.0006	0.253	0.252525	0.251575
'flower'	1	0.2556	0.259	0.257							2	0.2651	0.2676	0.2664							5	0.2578	0.2563	0.2554							222	0.2712	0.271	0.2688								'flower'	0.0007	0.262425	0.263475	0.2619
'flower'	1	0.2666	0.2695	0.2683							2	0.2778	0.28	0.2793							5	0.268	0.269	0.2664							222	0.2825	0.2815	0.2795								'flower'	0.0008	0.273725	0.275	0.273375
'flower'	1	0.2754	0.28	0.2793							2	0.2869	0.2883	0.2864							5	0.2778	0.279	0.279							222	0.2922	0.2937	0.2927								'flower'	0.0009	0.283075	0.28525	0.28435
'flower'	1	0.2861	0.2903	0.2886							2	0.2964	0.3003	0.2976							5	0.2883	0.291	0.2908							222	0.3013	0.3032	0.3032								'flower'	0.001	0.293025	0.2962	0.29505
'flower'	1	0.3762	0.385	0.3828							2	0.378	0.3867	0.3828							5	0.372	0.386	0.3826							222	0.383	0.3987	0.3965								'flower'	0.002	0.3773	0.3891	0.386175
'flower'	1	0.425	0.4373	0.436							2	0.4253	0.441	0.438							5	0.4265	0.4429	0.441							222	0.4312	0.4517	0.4475								'flower'	0.003	0.427	0.443225	0.440625
'flower'	1	0.4482	0.463	0.4612							2	0.4478	0.4644	0.4607							5	0.4543	0.468	0.4644							222	0.4558	0.4727	0.4705								'flower'	0.004	0.451525	0.467025	0.4642
'flower'	1	0.4602	0.474	0.471							2	0.4658	0.476	0.4749							5	0.4678	0.4783	0.4739							222	0.4727	0.486	0.4841								'flower'	0.005	0.466625	0.478575	0.475975
'flower'	1	0.4724	0.4797	0.4778							2	0.475	0.4834	0.4807							5	0.4758	0.4846	0.479							222	0.482	0.4907	0.4885								'flower'	0.006	0.4763	0.4846	0.4815
'flower'	1	0.4802	0.4846	0.4812							2	0.4817	0.4897	0.4868							5	0.483	0.4878	0.4834							222	0.4883	0.4976	0.4944								'flower'	0.007	0.4833	0.489925	0.48645
'flower'	1	0.484	0.4858	0.483							2	0.4858	0.4922	0.4893							5	0.488	0.4902	0.4875							222	0.4924	0.4988	0.4968								'flower'	0.008	0.48755	0.49175	0.48915
'flower'	1	0.4885	0.4878	0.4841							2	0.4907	0.4944	0.491							5	0.4893	0.4915	0.4902							222	0.4963	0.501	0.499								'flower'	0.009	0.4912	0.493675	0.491075
'flower'	1	0.4907	0.4868	0.4856							2	0.4924	0.4954	0.493							5	0.4907	0.4932	0.4905							222	0.4988	0.5024	0.499								'flower'	0.01	0.49315	0.49445	0.492025
'flower'	1	0.4993	0.4924	0.4888							2	0.5063	0.506	0.5034							5	0.503	0.503	0.4983							222	0.5103	0.5103	0.507								'flower'	0.02	0.504725	0.502925	0.499375
'flower'	1	0.504	0.4937	0.4902							2	0.5137	0.511	0.508							5	0.51	0.508	0.5024							222	0.514	0.514	0.51								'flower'	0.03	0.510425	0.506675	0.50265
'flower'	1	0.509	0.4946	0.4934							2	0.5186	0.5117	0.51							5	0.5127	0.508	0.504							222	0.5176	0.516	0.5127								'flower'	0.04	0.514475	0.507575	0.505025
'flower'	1	0.511	0.495	0.492							2	0.5234	0.514	0.513							5	0.5137	0.5083	0.503							222	0.525	0.517	0.5146								'flower'	0.05	0.518275	0.508575	0.50565
'flower'	1	0.5093	0.4932	0.4897							2	0.526	0.5156	0.5127							5	0.518	0.5073	0.5034							222	0.5273	0.5137	0.51								'flower'	0.06	0.52015	0.50745	0.50395
'flower'	1	0.5083	0.489	0.4858							2	0.5293	0.513	0.5103							5	0.519	0.5054	0.4995							222	0.53	0.51	0.5073								'flower'	0.07	0.52165	0.50435	0.500725
'flower'	1	0.507	0.4846	0.4812							2	0.5293	0.51	0.505							5	0.5195	0.5024	0.4976							222	0.5293	0.5083	0.505								'flower'	0.08	0.521275	0.501325	0.4972
'flower'	1	0.5044	0.4817	0.4795							2	0.5283	0.506	0.501							5	0.5215	0.498	0.4932							222	0.5303	0.504	0.5024								'flower'	0.09	0.521125	0.497425	0.494025
'flower'	1	0.5015	0.4785	0.4763							2	0.5283	0.5015	0.498							5	0.5205	0.4954	0.4924							222	0.5283	0.5015	0.4993								'flower'	0.1	0.51965	0.494225	0.4915
'flower'	1	0.5	0.469	0.4668							2	0.517	0.489	0.4868							5	0.5195	0.4849	0.4817							222	0.521	0.488	0.4832								'flower'	0.2	0.514375	0.482725	0.479625
'flower'	1	0.4941	0.4631	0.4614							2	0.515	0.481	0.48							5	0.514	0.4766	0.4722							222	0.5156	0.4792	0.4736								'flower'	0.3	0.509675	0.474975	0.4718
'flower'	1	0.485	0.4543	0.454							2	0.51	0.468	0.469							5	0.51	0.4663	0.4624							222	0.5083	0.4705	0.4692								'flower'	0.4	0.503325	0.464775	0.46365
'flower'	1	0.4775	0.4473	0.4463							2	0.4998	0.4607	0.4587							5	0.4973	0.4563	0.455							222	0.5034	0.464	0.46								'flower'	0.5	0.4945	0.457075	0.455
'flower'	1	0.4702	0.4417	0.4343							2	0.493	0.4531	0.4531							5	0.4895	0.4558	0.4453							222	0.489	0.4573	0.4514								'flower'	0.6	0.485425	0.451975	0.446025
'flower'	1	0.4585	0.437	0.4365							2	0.4846	0.4517	0.4487							5	0.4866	0.448	0.4502							222	0.4866	0.452	0.4456								'flower'	0.7	0.479075	0.447175	0.44525
'flower'	1	0.4536	0.4307	0.4277							2	0.4778	0.4463	0.4387							5	0.4778	0.438	0.436							222	0.48	0.4473	0.4343								'flower'	0.8	0.4723	0.440575	0.434175
'flower'	1	0.4429	0.428	0.4236							2	0.471	0.441	0.4348							5	0.4636	0.4358	0.4304							222	0.4658	0.434	0.4329								'flower'	0.9	0.460825	0.4347	0.430425
'flower'	1	0.4304	0.4202	0.4128							2	0.4614	0.43	0.415							5	0.462	0.4282	0.4226							222	0.465	0.4253	0.4314								'flower'	1	0.4547	0.425925	0.42045
'mini'	1	0.2155	0.2152	0.2152							2	0.211	0.2122	0.2125							5	0.2125	0.2134	0.2133							222	0.2026	0.2021	0.2014								'mini'	0.0001	0.2104	0.210725	0.2106
'mini'	1	0.2227	0.2227	0.2225							2	0.2179	0.2185	0.2183							5	0.2196	0.2186	0.2181							222	0.2103	0.2108	0.2109								'mini'	0.0002	0.217625	0.21765	0.21745
'mini'	1	0.2307	0.2318	0.2311							2	0.2246	0.2255	0.2253							5	0.2261	0.2258	0.2253							222	0.22	0.218	0.2184								'mini'	0.0003	0.22535	0.225275	0.225025
'mini'	1	0.2394	0.2404	0.2396							2	0.234	0.2339	0.233							5	0.2339	0.2327	0.2335							222	0.227	0.2269	0.2268								'mini'	0.0004	0.233575	0.233475	0.233225
'mini'	1	0.2458	0.2482	0.2479							2	0.2418	0.2397	0.239							5	0.2412	0.2407	0.2402							222	0.2335	0.2346	0.234								'mini'	0.0005	0.240575	0.2408	0.240275
'mini'	1	0.2532	0.2563	0.256							2	0.2505	0.2495	0.2484							5	0.2489	0.2477	0.2467							222	0.24	0.2433	0.2418								'mini'	0.0006	0.24815	0.2492	0.248225
'mini'	1	0.2598	0.2651	0.2634							2	0.2578	0.2585	0.2566							5	0.2593	0.2566	0.2551							222	0.2476	0.2512	0.2499								'mini'	0.0007	0.256125	0.25785	0.25625
'mini'	1	0.268	0.2751	0.273							2	0.267	0.2654	0.2642							5	0.2676	0.269	0.2656							222	0.2563	0.2615	0.2605								'mini'	0.0008	0.264725	0.26775	0.265825
'mini'	1	0.2769	0.2837	0.2812							2	0.2766	0.2754	0.2727							5	0.2756	0.2764	0.2734							222	0.2642	0.27	0.269								'mini'	0.0009	0.273325	0.276375	0.274075
'mini'	1	0.283	0.2888	0.2878							2	0.2837	0.2842	0.282							5	0.284	0.2817	0.2805							222	0.2744	0.2793	0.2773								'mini'	0.001	0.281275	0.2835	0.2819
'mini'	1	0.3528	0.3672	0.3652							2	0.3472	0.3623	0.3604							5	0.3518	0.3604	0.3555							222	0.345	0.3638	0.3625								'mini'	0.002	0.3492	0.363425	0.3609
'mini'	1	0.391	0.4045	0.4023							2	0.3906	0.4006	0.398							5	0.392	0.3916	0.3867							222	0.39	0.4075	0.4033								'mini'	0.003	0.3909	0.40105	0.397575
'mini'	1	0.4114	0.421	0.4167							2	0.4092	0.4146	0.4128							5	0.4111	0.4087	0.4016							222	0.4155	0.426	0.4236								'mini'	0.004	0.4118	0.417575	0.413675
'mini'	1	0.4236	0.4265	0.4229							2	0.424	0.4236	0.4238							5	0.4182	0.414	0.4097							222	0.429	0.4358	0.435								'mini'	0.005	0.4237	0.424975	0.42285
'mini'	1	0.4338	0.4312	0.429							2	0.4329	0.4312	0.4258							5	0.4243	0.4182	0.4133							222	0.4338	0.4404	0.44								'mini'	0.006	0.4312	0.43025	0.427025
'mini'	1	0.4382	0.4358	0.432							2	0.4358	0.432	0.4272							5	0.4316	0.4185	0.4133							222	0.439	0.4446	0.4395								'mini'	0.007	0.43615	0.432725	0.428
'mini'	1	0.4429	0.438	0.4363							2	0.4382	0.4329	0.429							5	0.4348	0.4197	0.4148							222	0.4421	0.4456	0.441								'mini'	0.008	0.4395	0.43405	0.430275
'mini'	1	0.447	0.4385	0.4358							2	0.4417	0.4348	0.4316							5	0.4363	0.4214	0.418							222	0.4458	0.4478	0.4414								'mini'	0.009	0.4427	0.435625	0.4317
'mini'	1	0.4507	0.4412	0.436							2	0.4438	0.4363	0.433							5	0.4397	0.4236	0.4182							222	0.447	0.4478	0.4417								'mini'	0.01	0.4453	0.437225	0.432225
'mini'	1	0.4622	0.4448	0.4377							2	0.4487	0.4395	0.4368							5	0.447	0.4268	0.425							222	0.4575	0.452	0.4446								'mini'	0.02	0.45385	0.440775	0.436025
'mini'	1	0.468	0.4458	0.4395							2	0.4546	0.4426	0.4395							5	0.4495	0.4287	0.4243							222	0.4573	0.45	0.4473								'mini'	0.03	0.45735	0.441775	0.43765
'mini'	1	0.4668	0.4456	0.4426							2	0.4602	0.4443	0.4417							5	0.4517	0.4275	0.4238							222	0.4587	0.4482	0.4446								'mini'	0.04	0.45935	0.4414	0.438175
'mini'	1	0.4695	0.446	0.4407							2	0.4612	0.4456	0.4424							5	0.4548	0.4255	0.4236							222	0.4648	0.448	0.4443								'mini'	0.05	0.462575	0.441275	0.43775
'mini'	1	0.4685	0.4434	0.4363							2	0.466	0.4438	0.4382							5	0.4536	0.4255	0.4219							222	0.467	0.4492	0.444								'mini'	0.06	0.463775	0.440475	0.4351
'mini'	1	0.466	0.44	0.4314							2	0.4648	0.4385	0.4353							5	0.453	0.422	0.4177							222	0.471	0.4492	0.4453								'mini'	0.07	0.4637	0.437425	0.432425
'mini'	1	0.4631	0.435	0.4307							2	0.4644	0.4363	0.433							5	0.452	0.4202	0.4158							222	0.4744	0.4507	0.4438								'mini'	0.08	0.463475	0.43555	0.430825
'mini'	1	0.4644	0.4329	0.4294							2	0.4646	0.4333	0.431							5	0.4507	0.4211	0.4167							222	0.476	0.4478	0.4404								'mini'	0.09	0.463925	0.433775	0.429375
'mini'	1	0.4636	0.4312	0.427							2	0.4639	0.4307	0.4297							5	0.4504	0.4194	0.4153							222	0.476	0.4453	0.438								'mini'	0.1	0.463475	0.43165	0.4275
'mini'	1	0.459	0.4197	0.4158							2	0.4648	0.4258	0.4246							5	0.4485	0.4084	0.4055							222	0.473	0.4348	0.4302								'mini'	0.2	0.461325	0.422175	0.419025
'mini'	1	0.4573	0.4106	0.4092							2	0.4626	0.4238	0.4207							5	0.4473	0.4045	0.401							222	0.4697	0.4268	0.4255								'mini'	0.3	0.459225	0.416425	0.4141
'mini'	1	0.4485	0.402	0.4026							2	0.4607	0.4182	0.416							5	0.4402	0.4004	0.401							222	0.4646	0.4226	0.421								'mini'	0.4	0.4535	0.4108	0.41015
'mini'	1	0.4412	0.3977	0.393							2	0.453	0.4106	0.4102							5	0.4397	0.3926	0.3926							222	0.4585	0.416	0.4136								'mini'	0.5	0.4481	0.404225	0.40235
'mini'	1	0.4385	0.3882	0.3896							2	0.4458	0.4084	0.4026							5	0.43	0.3945	0.3877							222	0.4504	0.4106	0.4053								'mini'	0.6	0.441175	0.400425	0.3963
'mini'	1	0.4312	0.3855	0.3853							2	0.439	0.3984	0.3982							5	0.43	0.384	0.384							222	0.4448	0.4097	0.4028								'mini'	0.7	0.43625	0.3944	0.392575
'mini'	1	0.421	0.379	0.3774							2	0.4219	0.3948	0.3953							5	0.4224	0.3784	0.3767							222	0.4375	0.4028	0.3994								'mini'	0.8	0.4257	0.38875	0.3872
'mini'	1	0.4043	0.3782	0.37							2	0.422	0.3877	0.389							5	0.4158	0.3777	0.3694							222	0.4307	0.3918	0.3933								'mini'	0.9	0.4182	0.38385	0.380425
'mini'	1	0.4019	0.3638	0.3674							2	0.3994	0.3809	0.3862							5	0.4055	0.3733	0.365							222	0.4167	0.3872	0.3857								'mini'	1	0.405875	0.3763	0.376075
'traffic'	1	0.2172	0.2166	0.2168							2	0.2052	0.2056	0.2057							5	0.2018	0.2012	0.2012							222	0.2075	0.2084	0.2081								'traffic'	0.0001	0.207925	0.20795	0.20795
'traffic'	1	0.223	0.2223	0.2212							2	0.2104	0.2096	0.2087							5	0.2091	0.2091	0.2084							222	0.216	0.2155	0.2155								'traffic'	0.0002	0.214625	0.214125	0.21345
'traffic'	1	0.2296	0.2294	0.2296							2	0.2168	0.2163	0.2166							5	0.2151	0.2151	0.214							222	0.224	0.2222	0.2219								'traffic'	0.0003	0.221375	0.22075	0.220525
'traffic'	1	0.2374	0.2361	0.2355							2	0.2258	0.224	0.2234							5	0.2191	0.2196	0.2198							222	0.2303	0.2291	0.2292								'traffic'	0.0004	0.22815	0.2272	0.226975
'traffic'	1	0.2445	0.2422	0.2416							2	0.2339	0.2316	0.2314							5	0.2268	0.2267	0.2264							222	0.2379	0.2382	0.2378								'traffic'	0.0005	0.235775	0.234675	0.2343
'traffic'	1	0.2524	0.2507	0.2505							2	0.244	0.2412	0.2408							5	0.2338	0.2344	0.2346							222	0.2458	0.2465	0.2455								'traffic'	0.0006	0.244	0.2432	0.24285
'traffic'	1	0.2598	0.2605	0.259							2	0.2512	0.25	0.2502							5	0.2412	0.241	0.2405							222	0.2546	0.2542	0.253								'traffic'	0.0007	0.2517	0.251425	0.250675
'traffic'	1	0.2673	0.2693	0.2678							2	0.2593	0.2593	0.2583							5	0.2507	0.25	0.2473							222	0.2605	0.2612	0.2598								'traffic'	0.0008	0.25945	0.25995	0.2583
'traffic'	1	0.2769	0.2778	0.277							2	0.2683	0.268	0.2678							5	0.258	0.261	0.258							222	0.2727	0.2715	0.2712								'traffic'	0.0009	0.268975	0.269575	0.2685
'traffic'	1	0.2854	0.2854	0.2834							2	0.2764	0.2778	0.2764							5	0.2678	0.2695	0.267							222	0.2815	0.281	0.28								'traffic'	0.001	0.277775	0.278425	0.2767
'traffic'	1	0.356	0.3513	0.3477							2	0.35	0.3528	0.348							5	0.352	0.3489	0.3435							222	0.3542	0.361	0.359								'traffic'	0.002	0.35305	0.3535	0.34955
'traffic'	1	0.391	0.385	0.381							2	0.386	0.3835	0.3813							5	0.388	0.3875	0.382							222	0.3918	0.4014	0.3965								'traffic'	0.003	0.3892	0.38935	0.3852
'traffic'	1	0.4062	0.4048	0.4							2	0.4006	0.3987	0.3953							5	0.4038	0.3994	0.3953							222	0.4143	0.4182	0.4128								'traffic'	0.004	0.406225	0.405275	0.40085
'traffic'	1	0.4158	0.4111	0.4114							2	0.408	0.406	0.405							5	0.4102	0.407	0.4019							222	0.4263	0.426	0.4216								'traffic'	0.005	0.415075	0.412525	0.409975
'traffic'	1	0.4197	0.4163	0.4146							2	0.4124	0.4126	0.4067							5	0.4163	0.4119	0.407							222	0.431	0.4292	0.426								'traffic'	0.006	0.41985	0.4175	0.413575
'traffic'	1	0.4246	0.4182	0.416							2	0.4146	0.411	0.4082							5	0.4172	0.4138	0.41							222	0.4348	0.434	0.4285								'traffic'	0.007	0.4228	0.41925	0.415675
'traffic'	1	0.426	0.4219	0.4163							2	0.4165	0.4102	0.41							5	0.4175	0.415	0.4104							222	0.4387	0.4358	0.4326								'traffic'	0.008	0.424675	0.420725	0.417325
'traffic'	1	0.4265	0.4233	0.4202							2	0.4175	0.4126	0.412							5	0.4197	0.414	0.411							222	0.439	0.4358	0.4346								'traffic'	0.009	0.425675	0.421425	0.41945
'traffic'	1	0.4282	0.4238	0.4204							2	0.4194	0.4126	0.4124							5	0.4211	0.4153	0.4114							222	0.441	0.436	0.4353								'traffic'	0.01	0.427425	0.421925	0.419875
'traffic'	1	0.4338	0.4302	0.4272							2	0.4226	0.419	0.4165							5	0.4238	0.4148	0.4102							222	0.4448	0.4385	0.4382								'traffic'	0.02	0.43125	0.425625	0.423025
'traffic'	1	0.436	0.4321	0.429							2	0.4255	0.4219	0.4182							5	0.4265	0.4155	0.4097							222	0.446	0.441	0.4392								'traffic'	0.03	0.4335	0.427625	0.424025
'traffic'	1	0.4375	0.4304	0.4287							2	0.4272	0.4224	0.422							5	0.4287	0.414	0.412							222	0.4473	0.4414	0.44								'traffic'	0.04	0.435175	0.42705	0.425675
'traffic'	1	0.4385	0.429	0.4294							2	0.4312	0.4238	0.4214							5	0.4316	0.4143	0.4126							222	0.4487	0.441	0.439								'traffic'	0.05	0.4375	0.427025	0.4256
'traffic'	1	0.442	0.4272	0.424							2	0.4343	0.4216	0.4229							5	0.4329	0.4111	0.4102							222	0.4487	0.4385	0.4338								'traffic'	0.06	0.439475	0.4246	0.422725
'traffic'	1	0.442	0.423	0.4214							2	0.433	0.42	0.4175							5	0.433	0.4106	0.4072							222	0.449	0.436	0.431								'traffic'	0.07	0.43925	0.4224	0.419275
'traffic'	1	0.4382	0.4216	0.4207							2	0.432	0.4194	0.418							5	0.4312	0.4075	0.4048							222	0.4482	0.4324	0.4316								'traffic'	0.08	0.4374	0.420225	0.418775
'traffic'	1	0.4395	0.4202	0.4187							2	0.433	0.4167	0.4175							5	0.432	0.409	0.4033							222	0.4478	0.4329	0.4316								'traffic'	0.09	0.438075	0.4197	0.417775
'traffic'	1	0.438	0.4167	0.415							2	0.4316	0.4155	0.416							5	0.431	0.4065	0.401							222	0.4456	0.4297	0.4287								'traffic'	0.1	0.43655	0.4171	0.415175
'traffic'	1	0.4294	0.4084	0.4067							2	0.4272	0.408	0.4019							5	0.4175	0.3943	0.3926							222	0.436	0.4143	0.4097								'traffic'	0.2	0.427525	0.40625	0.402725
'traffic'	1	0.4167	0.3943	0.3904							2	0.4148	0.3955	0.3953							5	0.4084	0.384	0.3806							222	0.43	0.4043	0.4048								'traffic'	0.3	0.417475	0.394525	0.392775
'traffic'	1	0.404	0.3755	0.3718							2	0.395	0.379	0.3794							5	0.3948	0.3716	0.3726							222	0.415	0.382	0.3809								'traffic'	0.4	0.4022	0.377025	0.376175
'traffic'	1	0.3843	0.3464	0.35							2	0.3777	0.3645	0.353							5	0.3865	0.3591	0.3635							222	0.3838	0.349	0.358								'traffic'	0.5	0.383075	0.35475	0.356125
'traffic'	1	0.3584	0.343	0.3333							2	0.359	0.3396	0.339							5	0.3704	0.3372	0.3447							222	0.375	0.3398	0.3333								'traffic'	0.6	0.3657	0.3399	0.337575
'traffic'	1	0.348	0.3174	0.3125							2	0.3557	0.326	0.3184							5	0.3628	0.3235	0.3232							222	0.346	0.3088	0.3076								'traffic'	0.7	0.353125	0.318925	0.315425
'traffic'	1	0.3262	0.301	0.2888							2	0.333	0.312	0.3113							5	0.3376	0.315	0.3171							222	0.34	0.3093	0.2937								'traffic'	0.8	0.3342	0.309325	0.302725
'traffic'	1	0.3137	0.2742	0.279							2	0.3408	0.2983	0.2954							5	0.325	0.285	0.2874							222	0.3333	0.2795	0.2793								'traffic'	0.9	0.3282	0.28425	0.285275
'traffic'	1	0.3162	0.2793	0.2654							2	0.3313	0.2908	0.2808							5	0.3164	0.274	0.2783							222	0.3254	0.2664	0.2825								'traffic'	1	0.322325	0.277625	0.27675
[truncated: 5 more columns]
