# Supplementary material
Source: ML conference proceedings conference paper supplement (https://openreview.net/forum?id=qkLMTphG5-h)
Supplement: supplementary_material [file 5way_5shot_Adam_AT_Only_ALL_Checkpoint_Last.xlsx]

## Sheet: 5way_5shot_Adam_AT_Only_ALL
		Adam	AT_Only	AT_Only		average	Adam	AT_Only	ALL			Adam	AT_Only	ALL		average	Adam	AT_Only	ALL			Adam	AT_Only	ALL		average	Adam	AT_Only	ALL			Adam	AT_Only	ALL		average	Adam	AT_Only	ALL			SGD	SGD+AT	Ours(SGD)		average	Adam	AT_Only	ALL
'cub'	1	0.2145	0.2136	0.2147		'cub'	0.356332	0.380497	0.383154		2	0.2133	0.213	0.2141		'cub'	0.357	0.381214	0.385741		3	0.2194	0.2186	0.2201		'cub'	0.352173	0.377192	0.381076		4	0.215	0.2139	0.2153		'cub'	0.345895	0.367062	0.370632		5	0.2068	0.207	0.2087		'cub'	0.346584	0.374716	0.376208
'cub'	1	0.2385	0.2369	0.2445		'flower'	0.544368	0.591189	0.594503		2	0.2317	0.2327	0.239		'flower'	0.529376	0.579949	0.580786		3	0.2361	0.236	0.2407		'flower'	0.546524	0.593897	0.595441		4	0.2388	0.2358	0.2415		'flower'	0.5381	0.58627	0.588178		5	0.2252	0.2272	0.2318		'flower'	0.552792	0.5993	0.600973
'cub'	1	0.2632	0.2634	0.2778		'mini'	0.375286	0.398311	0.407557		2	0.258	0.2612	0.2778		'mini'	0.380165	0.39937	0.409384		3	0.2593	0.2607	0.2705		'mini'	0.371873	0.395095	0.402011		4	0.2612	0.26	0.272		'mini'	0.374795	0.396186	0.405335		5	0.2448	0.2489	0.2634		'mini'	0.359386	0.382554	0.3907
'cub'	1	0.2917	0.2932	0.3162		'traffic'	0.497043	0.505719	0.513378		2	0.2844	0.291	0.317		'traffic'	0.514478	0.518281	0.528646		3	0.2837	0.2866	0.3105		'traffic'	0.507786	0.513497	0.519254		4	0.2869	0.287	0.3096		'traffic'	0.498176	0.506419	0.516457		5	0.2703	0.2751	0.3025		'traffic'	0.503811	0.509284	0.517151
'cub'	1	0.313	0.3257	0.3557		Average	0.443257	0.468929	0.474648		2	0.3098	0.3276	0.3552		Average	0.445255	0.469703	0.476139		3	0.3074	0.3188	0.3472		Average	0.444589	0.46992	0.474445		4	0.3071	0.3171	0.3489		Average	0.439241	0.463984	0.470151		5	0.295	0.3086	0.338		Average	0.440643	0.466464	0.471258
'cub'	1	0.335	0.3557	0.383				0.0256716			2	0.3342	0.3542	0.3909				0.0244486			3	0.3333	0.3533	0.3838				0.0253311			4	0.3318	0.349	0.3774				0.0247432			5	0.3147	0.339	0.3713				0.0258203
'cub'	1	0.3542	0.3792	0.415							2	0.3557	0.382	0.416							3	0.3518	0.378	0.4119							4	0.3523	0.3796	0.4055							5	0.3335	0.364	0.4016
'cub'	1	0.3699	0.4016	0.438		Top1 Acc.	Adam	AT_Only	ALL		2	0.373	0.4058	0.4414		Top1 Acc.	Adam	AT_Only	ALL		3	0.3665	0.4033	0.4316		Top1 Acc.	Adam	AT_Only	ALL		4	0.3684	0.3953	0.4204		Top1 Acc.	Adam	AT_Only	ALL		5	0.3506	0.3926	0.4233		Top1 Acc.	Adam	AT_Only	ALL
'cub'	1	0.3848	0.427	0.4526		'cub'	0.4578	0.4993	0.4978		2	0.388	0.427	0.459		'cub'	0.4692	0.511	0.51		3	0.3792	0.4248	0.4456		'cub'	0.4568	0.4966	0.4922		4	0.3855	0.4158	0.4382		'cub'	0.4487	0.4807	0.4812		5	0.3643	0.4111	0.4382		'cub'	0.455	0.4966	0.4976
'cub'	1	0.3955	0.4456	0.4634		'flower'	0.69	0.767	0.766		2	0.3994	0.4463	0.4724		'flower'	0.6807	0.7563	0.7515		3	0.3904	0.4375	0.4573		'flower'	0.6987	0.77	0.769		4	0.3953	0.431	0.4492		'flower'	0.684	0.763	0.7617		5	0.3767	0.4258	0.4517		'flower'	0.7026	0.769	0.7686
'cub'	1	0.444	0.4878	0.4868		'mini'	0.5557	0.5864	0.5903		2	0.4521	0.506	0.5034		'mini'	0.5664	0.583	0.583		3	0.443	0.4822	0.484		'mini'	0.5566	0.576	0.577		4	0.4397	0.4807	0.4812		'mini'	0.5454	0.5703	0.575		5	0.437	0.4858	0.4907		'mini'	0.534	0.565	0.5615
'cub'	1	0.4563	0.4937	0.4924		'traffic'	0.6694	0.6846	0.6904		2	0.4692	0.5093	0.506		'traffic'	0.6904	0.713	0.7163		3	0.4531	0.4878	0.488		'traffic'	0.672	0.696	0.7007		4	0.4487	0.4802	0.48		'traffic'	0.6694	0.696	0.6987		5	0.4536	0.4949	0.4949		'traffic'	0.675	0.698	0.706
'cub'	1	0.4578	0.4966	0.4958		Average	0.593225	0.634325	0.636125		2	0.4646	0.5103	0.51		Average	0.601675	0.640825	0.6402		3	0.4568	0.4937	0.4915		Average	0.596025	0.63465	0.634725		4	0.4463	0.479	0.477		Average	0.586875	0.6275	0.62915		5	0.455	0.4954	0.493		Average	0.59165	0.63215	0.633425
'cub'	1	0.455	0.4993	0.4917				0.0411			2	0.4656	0.508	0.509				0.03915			3	0.452	0.4934	0.4922				0.038625			4	0.4421	0.4746	0.473				0.040625			5	0.452	0.496	0.4968				0.0405
'cub'	1	0.4482	0.4954	0.4968							2	0.4583	0.511	0.508							3	0.4456	0.494	0.4912							4	0.434	0.4766	0.475							5	0.4434	0.493	0.4976
'cub'	1	0.4426	0.4954	0.491		Top-N%	Adam	AT_Only	ALL		2	0.4453	0.506	0.5034		Top-N%	Adam	AT_Only	ALL		3	0.436	0.4966	0.4922		Top-N%	Adam	AT_Only	ALL		4	0.4253	0.4724	0.4724		Top-N%	Adam	AT_Only	ALL		5	0.4395	0.494	0.4937		Top-N%	Adam	AT_Only	ALL
'cub'	1	0.4338	0.4988	0.494		'cub'	0.4142	0.469147	0.473247		2	0.442	0.507	0.5024		'cub'	0.422387	0.475393	0.479273		3	0.4285	0.4897	0.4897		'cub'	0.413007	0.46522	0.468287		4	0.4138	0.4714	0.4714		'cub'	0.40528	0.44966	0.455493		5	0.4324	0.4966	0.4937		'cub'	0.403844	0.463293	0.467627
'cub'	1	0.4272	0.4958	0.4978		'flower'	0.633553	0.7243	0.726107		2	0.4324	0.499	0.4924		'flower'	0.621587	0.71354	0.713773		3	0.4216	0.4902	0.4885		'flower'	0.638353	0.731147	0.731473		4	0.4067	0.4675	0.4739		'flower'	0.6289	0.71365	0.721213		5	0.4197	0.4907	0.485		'flower'	0.645633	0.733087	0.73152
'cub'	1	0.416	0.496	0.4956		'mini'	0.472593	0.522747	0.538493		2	0.4246	0.4932	0.4927		'mini'	0.4804	0.52564	0.539873		3	0.4126	0.4841	0.484		'mini'	0.468287	0.516647	0.52982		4	0.3997	0.4648	0.4749		'mini'	0.471467	0.517013	0.531193		5	0.4102	0.4873	0.4902		'mini'	0.453233	0.504053	0.518493
'cub'	1	0.374	0.4624	0.464		'traffic'	0.6228	0.647333	0.657647		2	0.382	0.4658	0.453		'traffic'	0.645453	0.668213	0.678593		3	0.3765	0.4578	0.454		'traffic'	0.63152	0.651453	0.660567		4	0.3591	0.4316	0.4387		'traffic'	0.620153	0.64974	0.658093		5	0.3667	0.4583	0.4497		'traffic'	0.627213	0.653053	0.662853
'cub'	1	0.3618	0.436	0.4238		Average	0.535787	0.590882	0.598873		2	0.3716	0.4287	0.42		Average	0.542457	0.595697	0.602878		3	0.37	0.434	0.4226		Average	0.537792	0.591117	0.597537		4	0.3564	0.413	0.4016		Average	0.53145	0.582516	0.591498		5	0.352	0.4287	0.4143		Average	0.532481	0.588372	0.595123
'cub'	1	0.3792	0.4058	0.405				0.055095			2	0.3677	0.4075	0.4094				0.05324			3	0.3604	0.4092	0.396				0.053325			4	0.353	0.391	0.3923				0.0510658			5	0.352	0.3992	0.389				0.0558907
'cub'	1	0.3699	0.392	0.3965							2	0.363	0.3884	0.3855							3	0.3633	0.3906	0.3958							4	0.3389	0.3826	0.3777							5	0.353	0.3909	0.3684
'cub'	1	0.373	0.387	0.377		15					2	0.356	0.3767	0.375							3	0.3596	0.3733	0.3762							4	0.3582	0.3647	0.3567							5	0.3506	0.3762	0.3667
'cub'	1	0.356	0.3672	0.3723		'cub'	0.3699	0.4016	0.415		2	0.3574	0.366	0.3745		'cub'	0.3677	0.4058	0.416		3	0.346	0.377	0.373		'cub'	0.3633	0.4033	0.4119		4	0.341	0.3616	0.3535		'cub'	0.3564	0.391	0.4016		5	0.3464	0.3667	0.369		'cub'	0.352	0.3926	0.4016
'cub'	1	0.3562	0.3567	0.3604		'flower'	0.5845	0.646	0.6567		2	0.3508	0.3667	0.3584		'flower'	0.569	0.6206	0.639		3	0.3508	0.3708	0.3691		'flower'	0.581	0.6533	0.6523		4	0.3389	0.3508	0.3442		'flower'	0.574	0.6274	0.6465		5	0.354	0.367	0.3535		'flower'	0.584	0.662	0.6646
'cub'	1	0.3438	0.3657	0.3677		'mini'	0.3796	0.4197	0.4448		2	0.3452	0.3599	0.375		'mini'	0.3848	0.4187	0.4458		3	0.35	0.3545	0.362		'mini'	0.372	0.409	0.433		4	0.341	0.3481	0.345		'mini'	0.375	0.4019	0.4414		5	0.3408	0.3564	0.3535		'mini'	0.3704	0.3962	0.4229
'cub'	1	0.3545	0.3667	0.3557		'traffic'	0.552	0.5693	0.5786		2	0.34	0.3667	0.356		'traffic'	0.5674	0.574	0.593		3	0.3447	0.36	0.3635		'traffic'	0.5527	0.5586	0.572		4	0.3374	0.343	0.342		'traffic'	0.539	0.5566	0.5674		5	0.346	0.3574	0.3572		'traffic'	0.5493	0.564	0.576
'cub'	1	0.3206	0.3264	0.3306		Average	0.4715	0.50915	0.523775		2	0.3296	0.3423	0.3274		Average	0.472225	0.504775	0.52345		3	0.3286	0.3218	0.325		Average	0.46725	0.50605	0.5173		4	0.3113	0.3154	0.3267		Average	0.4611	0.494225	0.514225		5	0.33	0.3315	0.3213		Average	0.463925	0.5037	0.516275
'cub'	1	0.3174	0.3098	0.3162							2	0.314	0.3086	0.316							3	0.319	0.3147	0.322							4	0.3206	0.3037	0.3057							5	0.3147	0.319	0.3184
'cub'	1	0.317	0.306	0.293							2	0.3142	0.307	0.3015							3	0.3064	0.3047	0.2954							4	0.3103	0.2986	0.288							5	0.3198	0.3162	0.3042
'cub'	1	0.3083	0.3088	0.2983							2	0.3171	0.292	0.2908							3	0.3044	0.303	0.297							4	0.2917	0.296	0.294							5	0.3054	0.3071	0.2844
'cub'	1	0.311	0.3062	0.3027							2	0.2983	0.2957	0.2966							3	0.3032	0.2966	0.2913							4	0.2903	0.2893	0.2805							5	0.303	0.3018	0.2964
'cub'	1	0.3042	0.304	0.283							2	0.305	0.2864	0.2856							3	0.2942	0.296	0.286							4	0.2917	0.2905	0.2756							5	0.2922	0.2947	0.2861
'cub'	1	0.2974	0.297	0.277							2	0.2944	0.2854	0.2883							3	0.3013	0.2964	0.2898							4	0.2925	0.282	0.2742							5	0.2937	0.284	0.28
'cub'	1	0.3088	0.291	0.2747							2	0.3008	0.2827	0.2773							3	0.2832	0.2852	0.285							4	0.2842	0.2825	0.2812							5	0.2842	0.2886	0.2698
'cub'	1	0.29	0.289	0.276							2	0.3003	0.2878	0.272							3	0.2925	0.2812	0.2756							4	0.283	0.2852	0.279							5	0.2944	0.2878	0.2717
'flower'	1	0.2283	0.2266	0.2301							2	0.2257	0.2241	0.2288							3	0.2318	0.2302	0.2313							4	0.2361	0.2341	0.2382							5	0.2385	0.2358	0.2378
'flower'	1	0.27	0.269	0.281							2	0.2664	0.2642	0.2734							3	0.2727	0.271	0.283							4	0.2754	0.2747	0.284							5	0.2817	0.2817	0.294
'flower'	1	0.321	0.3235	0.3496							2	0.3147	0.3125	0.3376							3	0.33	0.3289	0.3545							4	0.3257	0.3237	0.3499							5	0.3354	0.3364	0.364
'flower'	1	0.3792	0.3845	0.4255							2	0.364	0.3752	0.4172							3	0.3896	0.3958	0.4375							4	0.3787	0.3828	0.4263							5	0.3894	0.4026	0.4456
'flower'	1	0.4329	0.4526	0.5							2	0.4182	0.438	0.4922							3	0.4424	0.461	0.5093							4	0.4275	0.4478	0.496							5	0.443	0.469	0.5195
'flower'	1	0.476	0.5107	0.5576							2	0.4612	0.4998	0.55							3	0.4846	0.522	0.57							4	0.474	0.505	0.5576							5	0.4858	0.5254	0.5757
'flower'	1	0.5137	0.5605	0.602							2	0.4949	0.5493	0.599							3	0.5254	0.5723	0.6157							4	0.511	0.5586	0.603							5	0.5244	0.5737	0.622
'flower'	1	0.543	0.594	0.6323							2	0.5303	0.59	0.628							3	0.557	0.611	0.648							4	0.542	0.596	0.6304							5	0.557	0.614	0.6494
'flower'	1	0.568	0.6235	0.6567							2	0.553	0.6206	0.649							3	0.5825	0.642	0.6685							4	0.566	0.6226	0.6494							5	0.583	0.6426	0.6714
'flower'	1	0.5884	0.648	0.6743							2	0.576	0.642	0.6665							3	0.609	0.663	0.686							4	0.587	0.6445	0.666							5	0.6055	0.6665	0.687
'flower'	1	0.6743	0.719	0.7236							2	0.664	0.72	0.7207							3	0.687	0.7344	0.74							4	0.664	0.719	0.7236							5	0.6885	0.7324	0.7334
'flower'	1	0.69	0.7354	0.7397							2	0.679	0.7334	0.7373							3	0.6987	0.751	0.7554							4	0.681	0.7393	0.743							5	0.698	0.748	0.7495
'flower'	1	0.69	0.7485	0.752							2	0.6807	0.7437	0.7456							3	0.6978	0.7607	0.7627							4	0.684	0.7495	0.751							5	0.7026	0.757	0.7554
'flower'	1	0.681	0.7563	0.7583							2	0.671	0.7466	0.7495							3	0.6895	0.768	0.763							4	0.682	0.7534	0.7573							5	0.6943	0.7607	0.7617
'flower'	1	0.6704	0.761	0.761							2	0.663	0.7554	0.7495							3	0.677	0.769	0.7666							4	0.6694	0.7593	0.76							5	0.6875	0.765	0.765
'flower'	1	0.6587	0.765	0.7646							2	0.651	0.7563	0.7515							3	0.6646	0.7656	0.765							4	0.6567	0.761	0.7617							5	0.675	0.767	0.7686
'flower'	1	0.6484	0.765	0.7637							2	0.641	0.752	0.7515							3	0.655	0.77	0.7686							4	0.6484	0.7607	0.7607							5	0.657	0.768	0.765
'flower'	1	0.636	0.7656	0.7637							2	0.624	0.755	0.7515							3	0.6436	0.77	0.769							4	0.637	0.763	0.7607							5	0.648	0.7666	0.7607
'flower'	1	0.6235	0.767	0.766							2	0.611	0.751	0.751							3	0.6323	0.7666	0.766							4	0.625	0.7583	0.7603							5	0.638	0.769	0.7637
'flower'	1	0.5693	0.7397	0.737							2	0.555	0.7236	0.712							3	0.5767	0.739	0.7363							4	0.569	0.733	0.725							5	0.584	0.7583	0.7363
'flower'	1	0.5723	0.708	0.703							2	0.566	0.694	0.6777							3	0.5728	0.712	0.6987							4	0.5625	0.6953	0.69							5	0.574	0.7188	0.705
'flower'	1	0.5845	0.675	0.671							2	0.579	0.664	0.6543							3	0.5903	0.6816	0.674							4	0.574	0.674	0.663							5	0.5815	0.692	0.6855
'flower'	1	0.587	0.665	0.657							2	0.5703	0.6455	0.639							3	0.5806	0.663	0.6523							4	0.5728	0.6533	0.6465							5	0.599	0.662	0.6646
'flower'	1	0.5894	0.646	0.6353							2	0.572	0.619	0.6187							3	0.585	0.6533	0.626							4	0.5923	0.6274	0.6323							5	0.606	0.665	0.641
'flower'	1	0.5923	0.6357	0.627							2	0.5728	0.6104	0.602							3	0.581	0.63	0.619							4	0.583	0.6274	0.6177							5	0.5986	0.6475	0.6333
'flower'	1	0.5894	0.6323	0.616							2	0.569	0.6143	0.592							3	0.582	0.618	0.6025							4	0.5757	0.61	0.6104							5	0.6025	0.6387	0.625
'flower'	1	0.568	0.621	0.6035							2	0.566	0.5986	0.585							3	0.5796	0.619	0.597							4	0.574	0.599	0.5967							5	0.58	0.6177	0.6104
'flower'	1	0.577	0.624	0.609							2	0.5635	0.594	0.58							3	0.5747	0.5957	0.595							4	0.565	0.599	0.585							5	0.5776	0.6206	0.601
'flower'	1	0.563	0.5654	0.5586							2	0.5215	0.523	0.5356							3	0.551	0.5566	0.5464							4	0.5435	0.535	0.5396							5	0.5557	0.5713	0.5635
'flower'	1	0.543	0.525	0.536							2	0.506	0.5146	0.5127							3	0.526	0.518	0.511							4	0.524	0.526	0.5244							5	0.5254	0.534	0.5537
'flower'	1	0.5225	0.5254	0.5093							2	0.493	0.491	0.4854							3	0.5127	0.5044	0.508							4	0.5083	0.509	0.5127							5	0.5166	0.521	0.512
'flower'	1	0.504	0.5137	0.4888							2	0.482	0.4932	0.48							3	0.509	0.5073	0.488							4	0.4966	0.5176	0.482							5	0.5215	0.503	0.4922
'flower'	1	0.4988	0.4897	0.4756							2	0.4756	0.4832	0.472							3	0.497	0.506	0.477							4	0.4866	0.5024	0.471							5	0.516	0.4973	0.475
'flower'	1	0.4905	0.4902	0.4717							2	0.478	0.479	0.4668							3	0.4802	0.4844	0.469							4	0.4775	0.4973	0.4597							5	0.5054	0.4968	0.4736
'flower'	1	0.5063	0.489	0.4746							2	0.4807	0.4995	0.4526							3	0.4995	0.4932	0.4558							4	0.4956	0.4873	0.4548							5	0.502	0.4858	0.4646
'flower'	1	0.4966	0.483	0.482							2	0.4824	0.4836	0.4495							3	0.4758	0.4756	0.4622							4	0.4724	0.4717	0.434							5	0.4849	0.4834	0.4673
'flower'	1	0.4949	0.4702	0.4395							2	0.465	0.4985	0.424							3	0.477	0.4646	0.453							4	0.466	0.474	0.4387							5	0.49	0.4795	0.4426
'mini'	1	0.2052	0.2058	0.2067							2	0.2152	0.2139	0.2153							3	0.2107	0.2106	0.2128							4	0.2229	0.221	0.2241							5	0.2026	0.2024	0.2041
'mini'	1	0.2201	0.218	0.223							2	0.2311	0.2303	0.236							3	0.2256	0.2258	0.2296							4	0.2362	0.2368	0.24							5	0.218	0.2173	0.2198
'mini'	1	0.2384	0.2369	0.2495							2	0.2554	0.2546	0.2666							3	0.2439	0.2449	0.2566							4	0.256	0.256	0.2664							5	0.2374	0.2358	0.2446
'mini'	1	0.2642	0.267	0.2942							2	0.2827	0.286	0.3098							3	0.2727	0.2756	0.3003							4	0.2808	0.281	0.304							5	0.2605	0.2593	0.2793
'mini'	1	0.2937	0.3032	0.344							2	0.314	0.3237	0.3733							3	0.3018	0.313	0.3564							4	0.3083	0.3154	0.3557							5	0.286	0.2942	0.3333
'mini'	1	0.3257	0.3433	0.401							2	0.3464	0.372	0.4324							3	0.3342	0.3582	0.4238							4	0.3333	0.3564	0.4143							5	0.3174	0.3394	0.3965
'mini'	1	0.356	0.3867	0.456							2	0.374	0.4187	0.4805							3	0.3665	0.4055	0.4714							4	0.3635	0.4011	0.4622							5	0.347	0.385	0.449
'mini'	1	0.383	0.431	0.4922							2	0.408	0.459	0.5103							3	0.395	0.4512	0.5015							4	0.39	0.4397	0.4988							5	0.3762	0.4272	0.4888
'mini'	1	0.4087	0.4668	0.521							2	0.4321	0.4912	0.537							3	0.4214	0.4854	0.524							4	0.4163	0.4749	0.5254							5	0.3992	0.4631	0.513
'mini'	1	0.4312	0.498	0.545							2	0.4563	0.5127	0.5527							3	0.446	0.509	0.545							4	0.4395	0.5015	0.543							5	0.4238	0.4917	0.533
'mini'	1	0.531	0.5845	0.5903							2	0.5503	0.582	0.583							3	0.537	0.575	0.577							4	0.533	0.5703	0.575							5	0.5195	0.565	0.5615
'mini'	1	0.5557	0.5864	0.5854							2	0.5664	0.583	0.5786							3	0.5566	0.576	0.5728							4	0.5425	0.568	0.5674							5	0.534	0.561	0.561
'mini'	1	0.5522	0.579	0.578							2	0.558	0.577	0.5747							3	0.5503	0.5664	0.57							4	0.5454	0.5684	0.569							5	0.5293	0.558	0.5576
'mini'	1	0.5474	0.569	0.5757							2	0.5464	0.5703	0.5713							3	0.5396	0.559	0.562							4	0.5376	0.567	0.5635							5	0.5176	0.551	0.557
'mini'	1	0.5347	0.5645	0.5664							2	0.5337	0.564	0.567							3	0.5205	0.5503	0.5527							4	0.53	0.561	0.562							5	0.503	0.5464	0.549
'mini'	1	0.5146	0.5605	0.563							2	0.5166	0.5596	0.5635							3	0.5063	0.5483	0.5503							4	0.514	0.555	0.5566							5	0.4893	0.5405	0.541
'mini'	1	0.4993	0.553	0.558							2	0.502	0.553	0.5557							3	0.4907	0.5396	0.5444							4	0.5005	0.5464	0.549							5	0.4763	0.5337	0.533
'mini'	1	0.4844	0.55	0.5557							2	0.4849	0.546	0.5464							3	0.4714	0.535	0.5376							4	0.4866	0.5396	0.543							5	0.4585	0.5264	0.528
'mini'	1	0.4685	0.5425	0.5522							2	0.4692	0.5376	0.5376							3	0.4587	0.53	0.53							4	0.4744	0.5386	0.5366							5	0.4497	0.519	0.5195
'mini'	1	0.4016	0.489	0.4937							2	0.4055	0.4893	0.494							3	0.3855	0.478	0.4756							4	0.398	0.4817	0.475							5	0.3735	0.4563	0.4631
'mini'	1	0.397	0.4473	0.4448							2	0.3848	0.4412	0.4458							3	0.3655	0.4375	0.433							4	0.3892	0.4412	0.4414							5	0.3704	0.4253	0.4229
'mini'	1	0.3796	0.4197	0.4182							2	0.3918	0.4158	0.416							3	0.3733	0.409	0.404							4	0.375	0.4019	0.4055							5	0.3782	0.3962	0.396
'mini'	1	0.378	0.3962	0.4							2	0.3718	0.396	0.4006							3	0.372	0.3923	0.3835							4	0.3704	0.3938	0.3835							5	0.3672	0.3782	0.3801
'mini'	1	0.3687	0.3828	0.3782							2	0.3633	0.3767	0.3787							3	0.369	0.3713	0.3623							4	0.3674	0.3706	0.382							5	0.351	0.364	0.3616
'mini'	1	0.368	0.3738	0.3748							2	0.3694	0.3638	0.3667							3	0.3535	0.3674	0.362							4	0.3438	0.363	0.3755							5	0.3467	0.3535	0.3525
'mini'	1	0.359	0.3735	0.3748							2	0.3484	0.3596	0.3547							3	0.358	0.3567	0.3508							4	0.3552	0.3625	0.3591							5	0.3376	0.3418	0.346
'mini'	1	0.3474	0.3635	0.3584							2	0.3445	0.3486	0.3428							3	0.3423	0.3489	0.3586							4	0.3477	0.3518	0.3582							5	0.3286	0.3372	0.331
'mini'	1	0.3447	0.3542	0.351							2	0.3428	0.3389	0.3445							3	0.343	0.3447	0.3484							4	0.3538	0.3408	0.3596							5	0.326	0.3386	0.338
'mini'	1	0.3328	0.3206	0.3186							2	0.3176	0.3171	0.3218							3	0.3071	0.3167	0.3071							4	0.32	0.3152	0.3157							5	0.3013	0.307	0.3108
'mini'	1	0.3147	0.3042	0.3176							2	0.327	0.3015	0.3076							3	0.3071	0.3003	0.298							4	0.3013	0.2986	0.3176							5	0.2888	0.2974	0.281
'mini'	1	0.311	0.3025	0.304							2	0.3013	0.3008	0.2898							3	0.2996	0.2988	0.286							4	0.2922	0.2988	0.3086							5	0.2954	0.2893	0.284
'mini'	1	0.298	0.3037	0.2866							2	0.3025	0.2917	0.2874							3	0.2942	0.3062	0.289							4	0.2925	0.2954	0.2844							5	0.2842	0.2798	0.2693
'mini'	1	0.296	0.2844	0.2842							2	0.3047	0.2854	0.2922							3	0.2903	0.3008	0.2917							4	0.2944	0.2917	0.29							5	0.2776	0.2754	0.2734
'mini'	1	0.2974	0.29	0.283							2	0.2834	0.277	0.2893							3	0.289	0.287	0.2805							4	0.2927	0.2817	0.273							5	0.2847	0.274	0.2734
'mini'	1	0.2942	0.3025	0.285							2	0.2837	0.2803	0.279							3	0.288	0.2847	0.2837							4	0.2874	0.2969	0.274							5	0.28	0.275	0.2664
'mini'	1	0.2979	0.2888	0.274							2	0.283	0.283	0.2778							3	0.2837	0.284	0.272							4	0.29	0.2815	0.269							5	0.2822	0.2786	0.2708
'mini'	1	0.2856	0.2947	0.2754							2	0.2979	0.2754	0.2668							3	0.2893	0.2754	0.27							4	0.2856	0.2937	0.2693							5	0.2786	0.2705	0.2666
'traffic'	1	0.2496	0.2451	0.2499							2	0.2422	0.2384	0.2437							3	0.2472	0.2417	0.2458							4	0.2368	0.2357	0.24							5	0.2422	0.2385	0.2423
'traffic'	1	0.3093	0.3022	0.3174							2	0.3057	0.2983	0.3142							3	0.307	0.3008	0.3152							4	0.2913	0.2832	0.2998							5	0.301	0.29	0.3042
'traffic'	1	0.3674	0.3623	0.3904							2	0.3699	0.365	0.396							3	0.3694	0.3582	0.384							4	0.3525	0.3428	0.3743							5	0.36	0.3477	0.3838
'traffic'	1	0.4285	0.4216	0.463							2	0.4294	0.4275	0.4666							3	0.4253	0.4172	0.4534							4	0.4077	0.4072	0.4487							5	0.4197	0.4202	0.4607
'traffic'	1	0.4749	0.4817	0.5234							2	0.4812	0.485	0.528							3	0.482	0.475	0.5146							4	0.4617	0.466	0.5127							5	0.4731	0.4817	0.525
'traffic'	1	0.518	0.531	0.569							2	0.53	0.5366	0.5737							3	0.519	0.518	0.5566							4	0.5054	0.5195	0.5615							5	0.519	0.5293	0.565
'traffic'	1	0.552	0.5693	0.599							2	0.5674	0.574	0.6113							3	0.5527	0.5566	0.589							4	0.539	0.5566	0.5894							5	0.5493	0.564	0.593
'traffic'	1	0.5796	0.5957	0.6177							2	0.596	0.604	0.6304							3	0.581	0.5845	0.6123							4	0.568	0.585	0.6123							5	0.574	0.5864	0.615
'traffic'	1	0.598	0.6143	0.6353							2	0.616	0.623	0.6436							3	0.599	0.607	0.6294							4	0.5903	0.606	0.6294							5	0.5947	0.6055	0.6304
'traffic'	1	0.612	0.6323	0.653							2	0.6323	0.636	0.6543							3	0.611	0.623	0.6396							4	0.6064	0.6226	0.641							5	0.61	0.62	0.6436
'traffic'	1	0.6606	0.6807	0.6895							2	0.682	0.696	0.706							3	0.6626	0.676	0.686							4	0.661	0.6875	0.692							5	0.6626	0.6797	0.681
'traffic'	1	0.6694	0.6846	0.6895							2	0.689	0.7026	0.7144							3	0.6704	0.696	0.697							4	0.6694	0.696	0.697							5	0.675	0.691	0.6963
'traffic'	1	0.6655	0.683	0.6904							2	0.6904	0.7085	0.715							3	0.672	0.693	0.6978							4	0.665	0.696	0.697							5	0.6733	0.695	0.7036
'traffic'	1	0.664	0.6807	0.686							2	0.685	0.7095	0.716							3	0.6694	0.6924	0.7007							4	0.661	0.6943	0.6987							5	0.67	0.698	0.706
'traffic'	1	0.655	0.6826	0.686							2	0.6836	0.7114	0.7163							3	0.6694	0.6914	0.698							4	0.6543	0.6885	0.6973							5	0.661	0.698	0.706
'traffic'	1	0.6494	0.6763	0.684							2	0.675	0.713	0.7124							3	0.6675	0.689	0.6953							4	0.6465	0.689	0.695							5	0.6577	0.6914	0.7017
'traffic'	1	0.6426	0.6797	0.684							2	0.6694	0.704	0.713							3	0.6567	0.6885	0.693							4	0.6416	0.689	0.689							5	0.6533	0.6953	0.699
'traffic'	1	0.6406	0.6685	0.677							2	0.657	0.703	0.706							3	0.6514	0.682	0.6904							4	0.636	0.68	0.6846							5	0.649	0.683	0.689
'traffic'	1	0.629	0.667	0.678							2	0.654	0.6987	0.7046							3	0.6475	0.681	0.687							4	0.631	0.6743	0.6753							5	0.6406	0.679	0.6855
'traffic'	1	0.5713	0.6216	0.6167							2	0.608	0.6445	0.6426							3	0.5977	0.6274	0.621							4	0.5815	0.611	0.606							5	0.5874	0.626	0.6167
'traffic'	1	0.553	0.5737	0.5786							2	0.5767	0.595	0.593							3	0.5645	0.582	0.572							4	0.5513	0.5703	0.5674							5	0.5503	0.5835	0.576
'traffic'	1	0.534	0.544	0.5435							2	0.5454	0.5615	0.567							3	0.5454	0.5586	0.5557							4	0.535	0.545	0.549							5	0.541	0.5576	0.554
'traffic'	1	0.5093	0.5234	0.526							2	0.5327	0.53	0.543							3	0.526	0.5312	0.5376							4	0.508	0.5215	0.519							5	0.5205	0.5195	0.524
'traffic'	1	0.4998	0.504	0.5166							2	0.5137	0.5107	0.514							3	0.5093	0.5254	0.521							4	0.4956	0.501	0.518							5	0.5137	0.5146	0.5186
'traffic'	1	0.4883	0.492	0.4912							2	0.515	0.4983	0.5073							3	0.4866	0.5146	0.5063							4	0.502	0.4934	0.4998							5	0.504	0.4924	0.4917
'traffic'	1	0.4778	0.481	0.4758							2	0.502	0.4834	0.4949							3	0.4902	0.5093	0.5015							4	0.4976	0.4817	0.4995							5	0.4878	0.493	0.493
'traffic'	1	0.464	0.4707	0.476							2	0.4875	0.4817	0.4802							3	0.495	0.4883	0.483							4	0.483	0.4739	0.4888							5	0.482	0.4766	0.478
'traffic'	1	0.4631	0.469	0.4602							2	0.482	0.474	0.4893							3	0.473	0.4812	0.475							4	0.4822	0.4683	0.476							5	0.4814	0.4658	0.4548
'traffic'	1	0.4233	0.415	0.4048							2	0.4465	0.4167	0.425							3	0.4355	0.4214	0.4143							4	0.426	0.4146	0.4138							5	0.4338	0.4219	0.4138
'traffic'	1	0.3894	0.3738	0.378							2	0.408	0.3928	0.3943							3	0.4124	0.3865	0.3916							4	0.3965	0.3801	0.4048							5	0.3909	0.3845	0.3828
'traffic'	1	0.3672	0.36	0.3623							2	0.382	0.3667	0.3801							3	0.3877	0.3738	0.374							4	0.3828	0.3748	0.3694							5	0.398	0.3572	0.3591
'traffic'	1	0.3628	0.344	0.3433							2	0.3748	0.3672	0.368							3	0.3901	0.3706	0.3723							4	0.3665	0.3635	0.3518							5	0.3645	0.3408	0.3628
'traffic'	1	0.3503	0.3547	0.3394							2	0.3767	0.3562	0.342							3	0.3596	0.3567	0.3555							4	0.3745	0.3523	0.3572							5	0.356	0.346	0.35
'traffic'	1	0.3533	0.3398	0.3347							2	0.3674	0.3354	0.3381							3	0.3716	0.3384	0.3418							4	0.3572	0.338	0.3489							5	0.3604	0.3489	0.3406
'traffic'	1	0.3418	0.3298	0.333							2	0.3577	0.3474	0.3342							3	0.3633	0.3535	0.3357							4	0.3662	0.339	0.3372							5	0.3699	0.3396	0.3225
'traffic'	1	0.334	0.3333	0.3167							2	0.3652	0.3337	0.333							3	0.3667	0.353	0.3362							4	0.3545	0.3447	0.3467							5	0.3562	0.3357	0.337
'traffic'	1	0.3425	0.3232	0.3157							2	0.3389	0.3467	0.3484							3	0.353	0.3562	0.3328							4	0.3472	0.3452	0.3206							5	0.3577	0.3462	0.3281
