# Supplementary material
Source: ML conference proceedings conference paper supplement (https://openreview.net/forum?id=qkLMTphG5-h)
Supplement: supplementary_material [file 5way_5shot_Adam_AT_Only_ALL_Checkpoint_Validation.xlsx]

## Sheet: 5way_5shot_Adam_AT_Only_ALL
		Adam	AT_Only	ALL		average	Adam	AT_Only	ALL			Adam	AT_Only	ALL		average	Adam	AT_Only	ALL			Adam	AT_Only	ALL		average	Adam	AT_Only	ALL			Adam	AT_Only	ALL		average	Adam	AT_Only	ALL			SGD	SGD+AT	Ours(SGD)		average	Adam	AT_Only	ALL
'cub'	1	0.2296	0.2283	0.2302		'cub'	0.366116	0.388068	0.388076		2	0.2236	0.2214	0.222		'cub'	0.367638	0.386554	0.387749		3	0.2219	0.2207	0.2216		'cub'	0.361562	0.3834	0.383516		4	0.2307	0.2323	0.2345		'cub'	0.357068	0.377973	0.379092		5	0.2208	0.2186	0.2202		'cub'	0.359435	0.3823	0.381643
'cub'	1	0.2603	0.2603	0.266		'flower'	0.575568	0.606641	0.601224		2	0.258	0.2537	0.2583		'flower'	0.565227	0.593035	0.588335		3	0.2498	0.249	0.2517		'flower'	0.573324	0.608395	0.605108		4	0.261	0.2595	0.2637		'flower'	0.569146	0.599808	0.593965		5	0.248	0.2467	0.2522		'flower'	0.585132	0.614827	0.608676
'cub'	1	0.296	0.2988	0.306		'mini'	0.400614	0.413292	0.417343		2	0.2915	0.292	0.2974		'mini'	0.398846	0.412341	0.414543		3	0.282	0.2812	0.2913		'mini'	0.394186	0.410365	0.413711		4	0.2964	0.2964	0.303		'mini'	0.396319	0.410592	0.414168		5	0.2834	0.281	0.2896		'mini'	0.386322	0.400578	0.403124
'cub'	1	0.329	0.333	0.3442		'traffic'	0.520519	0.518122	0.518946		2	0.3203	0.3276	0.339		'traffic'	0.537251	0.536157	0.538365		3	0.32	0.3267	0.3376		'traffic'	0.527622	0.525214	0.526981		4	0.3267	0.333	0.3464		'traffic'	0.521395	0.520973	0.522641		5	0.3135	0.3225	0.3342		'traffic'	0.523427	0.521857	0.524611
'cub'	1	0.3591	0.373	0.3892		Average	0.465704	0.48153	0.481397		2	0.3489	0.364	0.3796		Average	0.467241	0.482022	0.482248		3	0.3481	0.3633	0.3813		Average	0.464174	0.481843	0.482329		4	0.356	0.366	0.386		Average	0.460982	0.477336	0.477466		5	0.3416	0.352	0.3674		Average	0.463579	0.479891	0.479514
'cub'	1	0.3826	0.4011	0.4207				0.0158264			2	0.3745	0.4006	0.418				0.0147811			3	0.377	0.4006	0.4226				0.0176696			4	0.378	0.4036	0.4204				0.0163547			5	0.3652	0.3887	0.4067				0.0163115
'cub'	1	0.4038	0.4275	0.4492							2	0.3994	0.429	0.4521							3	0.4016	0.4343	0.4543							4	0.3997	0.4304	0.4497							5	0.3877	0.4182	0.4329
'cub'	1	0.4187	0.4482	0.4688		Top1 Acc.	Adam	AT_Only	ALL		2	0.42	0.457	0.4766		Top1 Acc.	Adam	AT_Only	ALL		3	0.4214	0.4558	0.473		Top1 Acc.	Adam	AT_Only	ALL		4	0.4155	0.452	0.465		Top1 Acc.	Adam	AT_Only	ALL		5	0.4065	0.4395	0.4578		Top1 Acc.	Adam	AT_Only	ALL
'cub'	1	0.4312	0.4705	0.4846		'cub'	0.4795	0.5063	0.508		2	0.4353	0.4805	0.4946		'cub'	0.4927	0.519	0.5225		3	0.4333	0.4749	0.4883		'cub'	0.4768	0.507	0.5054		4	0.426	0.4673	0.4766		'cub'	0.4717	0.4978	0.4976		5	0.4204	0.4624	0.474		'cub'	0.4707	0.509	0.506
'cub'	1	0.4385	0.4805	0.4941		'flower'	0.7256	0.772	0.774		2	0.45	0.4902	0.502		'flower'	0.7153	0.7607	0.759		3	0.4424	0.4875	0.4956		'flower'	0.733	0.779	0.7783		4	0.434	0.475	0.4846		'flower'	0.7256	0.7676	0.768		5	0.429	0.4736	0.484		'flower'	0.7407	0.7827	0.782
'cub'	1	0.4785	0.5063	0.508		'mini'	0.596	0.616	0.6143		2	0.4905	0.519	0.5225		'mini'	0.5933	0.6084	0.602		3	0.4758	0.507	0.5054		'mini'	0.5864	0.6055	0.604		4	0.4717	0.4978	0.4976		'mini'	0.587	0.596	0.5947		5	0.4688	0.506	0.506		'mini'	0.575	0.5903	0.5874
'cub'	1	0.4795	0.5054	0.506		'traffic'	0.71	0.7017	0.7065		2	0.4927	0.518	0.517		'traffic'	0.7295	0.7383	0.7437		3	0.4768	0.507	0.504		'traffic'	0.7085	0.7197	0.7266		4	0.4714	0.496	0.4932		'traffic'	0.704	0.7095	0.7114		5	0.4707	0.509	0.5034		'traffic'	0.713	0.719	0.7188
'cub'	1	0.4758	0.5034	0.504		Average	0.627775	0.649	0.6507		2	0.483	0.5103	0.514		Average	0.6327	0.6566	0.6568		3	0.4727	0.5044	0.5005		Average	0.626175	0.6528	0.653575		4	0.4644	0.4937	0.4937		Average	0.622075	0.642725	0.642925		5	0.467	0.5054	0.5005		Average	0.62485	0.65025	0.64855
'cub'	1	0.465	0.503	0.502				0.021225			2	0.479	0.5083	0.5073				0.0239			3	0.4646	0.4983	0.4958				0.026625			4	0.4556	0.4932	0.4888				0.02065			5	0.4578	0.4993	0.4995				0.0254
'cub'	1	0.4558	0.5005	0.4978							2	0.4673	0.503	0.5083							3	0.4563	0.4973	0.4924							4	0.4495	0.4858	0.4858							5	0.4504	0.5	0.4907
'cub'	1	0.4502	0.4958	0.4966		Top-N%	Adam	AT_Only	ALL		2	0.4595	0.502	0.5034		Top-N%	Adam	AT_Only	ALL		3	0.4485	0.489	0.4905		Top-N%	Adam	AT_Only	ALL		4	0.441	0.482	0.4849		Top-N%	Adam	AT_Only	ALL		5	0.442	0.498	0.4907		Top-N%	Adam	AT_Only	ALL
'cub'	1	0.4421	0.493	0.492		'cub'	0.437573	0.476933	0.48182		2	0.4546	0.495	0.4985		'cub'	0.444093	0.482287	0.488473		3	0.4404	0.486	0.4844		'cub'	0.435687	0.47616	0.47944		4	0.4333	0.478	0.4795		'cub'	0.429247	0.468347	0.472333		5	0.4333	0.4912	0.491		'cub'	0.427253	0.474533	0.475167
'cub'	1	0.4336	0.4888	0.4858		'flower'	0.675173	0.735107	0.738507		2	0.4424	0.492	0.4897		'flower'	0.66558	0.7234	0.72378		3	0.4302	0.4807	0.482		'flower'	0.68098	0.742787	0.744113		4	0.422	0.4734	0.477		'flower'	0.672153	0.73048	0.732713		5	0.4243	0.4888	0.4832		'flower'	0.692933	0.745593	0.74794
'cub'	1	0.4233	0.4805	0.478		'mini'	0.521693	0.552327	0.561013		2	0.4312	0.4854	0.4863		'mini'	0.517593	0.547113	0.55624		3	0.4233	0.4746	0.477		'mini'	0.512293	0.5459	0.553907		4	0.4133	0.468	0.4692		'mini'	0.513513	0.54368	0.552553		5	0.418	0.485	0.4766		'mini'	0.50318	0.53518	0.54318
'cub'	1	0.385	0.4448	0.4397		'traffic'	0.666713	0.665973	0.67266		2	0.382	0.4316	0.4368		'traffic'	0.683288	0.6965	0.702073		3	0.371	0.4326	0.4258		'traffic'	0.670593	0.67652	0.683627		4	0.3633	0.429	0.419		'traffic'	0.664713	0.673393	0.67768		5	0.3677	0.4336	0.4302		'traffic'	0.668047	0.675967	0.682073
'cub'	1	0.3625	0.4058	0.4087		Average	0.575288	0.607585	0.6135		2	0.3726	0.413	0.4082		Average	0.577639	0.612325	0.617642		3	0.3645	0.413	0.4033		Average	0.574888	0.610342	0.615272		4	0.3562	0.4001	0.3948		Average	0.569907	0.603975	0.60882		5	0.3613	0.408	0.407		Average	0.572853	0.607818	0.61209
'cub'	1	0.3557	0.404	0.3894				0.0322967			2	0.359	0.3914	0.3848				0.0346865			3	0.3572	0.3955	0.397				0.0354533			4	0.346	0.3748	0.3718				0.0340683			5	0.3533	0.3953	0.3904				0.034965
'cub'	1	0.36	0.3865	0.3748							2	0.356	0.3857	0.3687							3	0.361	0.383	0.3696							4	0.338	0.3635	0.3564							5	0.3462	0.3777	0.3767
'cub'	1	0.3535	0.3792	0.373		15					2	0.3513	0.3752	0.3591							3	0.341	0.371	0.3596							4	0.3386	0.3633	0.3625							5	0.3486	0.3792	0.368
'cub'	1	0.3435	0.3704	0.3623		'cub'	0.3826	0.4058	0.4207		2	0.359	0.363	0.3616		'cub'	0.3745	0.413	0.418		3	0.3398	0.358	0.3582		'cub'	0.371	0.413	0.4226		4	0.3237	0.3535	0.3557		'cub'	0.3633	0.4036	0.419		5	0.35	0.36	0.3608		'cub'	0.3652	0.408	0.407
'cub'	1	0.3396	0.3652	0.3545		'flower'	0.5933	0.6567	0.6714		2	0.3523	0.3547	0.3513		'flower'	0.593	0.649	0.655		3	0.3293	0.3552	0.3499		'flower'	0.599	0.669	0.668		4	0.32	0.3542	0.3354		'flower'	0.5894	0.657	0.649		5	0.3438	0.367	0.364		'flower'	0.609	0.671	0.682
'cub'	1	0.3447	0.35	0.3484		'mini'	0.4194	0.4395	0.4575		2	0.3496	0.3374	0.3506		'mini'	0.401	0.4487	0.4492		3	0.3372	0.3547	0.3545		'mini'	0.4136	0.4558	0.4548		4	0.3298	0.343	0.336		'mini'	0.4202	0.4521	0.4575		5	0.3357	0.3538	0.3542		'mini'	0.3894	0.44	0.4285
'cub'	1	0.3477	0.3508	0.3376		'traffic'	0.5825	0.5938	0.5977		2	0.3315	0.3503	0.3408		'traffic'	0.594	0.6206	0.605		3	0.3381	0.3499	0.3496		'traffic'	0.5903	0.6045	0.5957		4	0.3176	0.3313	0.3374		'traffic'	0.586	0.5986	0.5957		5	0.3347	0.3464	0.351		'traffic'	0.5957	0.6094	0.6006
'cub'	1	0.3396	0.319	0.3179		Average	0.49445	0.52395	0.536825		2	0.3142	0.3208	0.3262		Average	0.490625	0.532825	0.5318		3	0.3318	0.313	0.3247		Average	0.493475	0.535575	0.535275		4	0.2998	0.3037	0.3213		Average	0.489725	0.527825	0.5303		5	0.3245	0.3198	0.3223		Average	0.489825	0.5321	0.529525
'cub'	1	0.319	0.31	0.3103							2	0.3071	0.3127	0.296							3	0.3	0.3054	0.302							4	0.2988	0.3071	0.3096							5	0.3105	0.301	0.3079
'cub'	1	0.3037	0.3145	0.3022							2	0.2988	0.294	0.2979							3	0.3042	0.306	0.2896							4	0.2927	0.3005	0.2842							5	0.3184	0.3066	0.295
'cub'	1	0.3064	0.3103	0.3054							2	0.2917	0.2993	0.2976							3	0.2898	0.3025	0.2927							4	0.3018	0.286	0.2883							5	0.3032	0.3022	0.291
'cub'	1	0.305	0.2988	0.2842							2	0.291	0.3018	0.29							3	0.294	0.2793	0.276							4	0.2915	0.277	0.2866							5	0.2964	0.289	0.2834
'cub'	1	0.286	0.288	0.291							2	0.2932	0.284	0.2795							3	0.2842	0.2805	0.281							4	0.294	0.271	0.2695							5	0.2961	0.2852	0.272
'cub'	1	0.2898	0.2795	0.2803							2	0.302	0.2842	0.269							3	0.2869	0.282	0.2734							4	0.2861	0.2825	0.2705							5	0.2822	0.2778	0.269
'cub'	1	0.275	0.2913	0.2825							2	0.2842	0.279	0.2793							3	0.2837	0.2795	0.2656							4	0.2844	0.2786	0.2612							5	0.2969	0.2776	0.2646
'cub'	1	0.277	0.2925	0.2734							2	0.2854	0.2754	0.2627							3	0.278	0.2864	0.2683							4	0.283	0.2825	0.2666							5	0.2812	0.279	0.2527
'flower'	1	0.2585	0.258	0.2612							2	0.2534	0.2499	0.2524							3	0.252	0.2534	0.255							4	0.2678	0.2659	0.268							5	0.259	0.257	0.2617
'flower'	1	0.3447	0.3408	0.3503							2	0.3286	0.3254	0.3335							3	0.338	0.3376	0.3474							4	0.341	0.3376	0.3467							5	0.3423	0.34	0.3508
'flower'	1	0.4275	0.4243	0.4426							2	0.415	0.4124	0.4275							3	0.4272	0.4287	0.4478							4	0.4236	0.4258	0.441							5	0.433	0.4377	0.4534
'flower'	1	0.494	0.503	0.5283							2	0.4875	0.4973	0.5195							3	0.5005	0.5146	0.537							4	0.4963	0.511	0.5356							5	0.51	0.522	0.5425
'flower'	1	0.5474	0.572	0.592							2	0.544	0.566	0.5864							3	0.555	0.585	0.61							4	0.551	0.577	0.602							5	0.569	0.5864	0.61
'flower'	1	0.592	0.622	0.6406							2	0.583	0.6133	0.6323							3	0.598	0.6357	0.653							4	0.5894	0.6235	0.6436							5	0.6074	0.636	0.656
'flower'	1	0.625	0.6567	0.6714							2	0.6147	0.649	0.665							3	0.625	0.669	0.6855							4	0.618	0.658	0.6743							5	0.6367	0.671	0.686
'flower'	1	0.645	0.6816	0.6904							2	0.635	0.6743	0.685							3	0.648	0.6934	0.705							4	0.642	0.6807	0.6963							5	0.6597	0.6953	0.7065
'flower'	1	0.662	0.6987	0.708							2	0.651	0.6895	0.697							3	0.6665	0.7065	0.72							4	0.659	0.698	0.709							5	0.6743	0.7104	0.723
'flower'	1	0.675	0.712	0.715							2	0.665	0.7017	0.7056							3	0.6772	0.7188	0.73							4	0.672	0.709	0.718							5	0.687	0.7246	0.7305
'flower'	1	0.7197	0.7563	0.76							2	0.711	0.7437	0.742							3	0.7275	0.765	0.766							4	0.716	0.755	0.7563							5	0.738	0.763	0.7676
'flower'	1	0.7256	0.7637	0.7666							2	0.7153	0.755	0.7534							3	0.733	0.7754	0.772							4	0.7256	0.761	0.762							5	0.74	0.774	0.773
'flower'	1	0.7207	0.7686	0.774							2	0.7095	0.7583	0.7573							3	0.7275	0.779	0.774							4	0.7207	0.766	0.768							5	0.7407	0.781	0.7773
'flower'	1	0.7144	0.7705	0.773							2	0.701	0.7607	0.756							3	0.7183	0.778	0.7783							4	0.7144	0.7676	0.767							5	0.735	0.7827	0.781
'flower'	1	0.7056	0.772	0.772							2	0.695	0.7583	0.759							3	0.71	0.7773	0.7764							4	0.704	0.7656	0.7656							5	0.7266	0.7803	0.7817
'flower'	1	0.697	0.772	0.7734							2	0.686	0.757	0.7544							3	0.705	0.7773	0.775							4	0.693	0.7656	0.7627							5	0.7183	0.78	0.782
'flower'	1	0.6904	0.766	0.7715							2	0.677	0.7554	0.7524							3	0.6953	0.7744	0.7725							4	0.685	0.762	0.7593							5	0.708	0.7764	0.779
'flower'	1	0.681	0.764	0.765							2	0.6675	0.7524	0.7466							3	0.6885	0.77	0.768							4	0.6777	0.7593	0.754							5	0.698	0.7734	0.774
'flower'	1	0.6694	0.7583	0.7603							2	0.6597	0.746	0.742							3	0.6772	0.761	0.76							4	0.6665	0.7534	0.7485							5	0.6914	0.7695	0.7705
'flower'	1	0.6035	0.709	0.7056							2	0.603	0.691	0.686							3	0.6167	0.718	0.711							4	0.599	0.699	0.7007							5	0.6313	0.7183	0.705
'flower'	1	0.5933	0.6772	0.6714							2	0.593	0.6587	0.655							3	0.599	0.6787	0.668							4	0.576	0.657	0.649							5	0.6045	0.684	0.682
'flower'	1	0.588	0.6494	0.6455							2	0.581	0.6284	0.6274							3	0.584	0.6562	0.6387							4	0.5845	0.6406	0.6187							5	0.609	0.6616	0.632
'flower'	1	0.584	0.625	0.6157							2	0.5713	0.603	0.6006							3	0.589	0.6255	0.62							4	0.5645	0.612	0.6113							5	0.5977	0.629	0.6206
'flower'	1	0.574	0.6055	0.5996							2	0.57	0.608	0.5845							3	0.572	0.6084	0.606							4	0.5747	0.595	0.5986							5	0.5903	0.615	0.6133
'flower'	1	0.573	0.594	0.5977							2	0.5605	0.585	0.581							3	0.563	0.6025	0.6006							4	0.569	0.5957	0.588							5	0.5786	0.611	0.5996
'flower'	1	0.5723	0.601	0.5854							2	0.558	0.58	0.5874							3	0.5586	0.5874	0.5757							4	0.556	0.59	0.583							5	0.579	0.609	0.599
'flower'	1	0.578	0.5947	0.585							2	0.557	0.573	0.559							3	0.5483	0.5786	0.5747							4	0.555	0.5825	0.5693							5	0.567	0.5913	0.585
'flower'	1	0.5674	0.5854	0.5703							2	0.541	0.5625	0.5576							3	0.5474	0.575	0.558							4	0.543	0.5684	0.562							5	0.57	0.585	0.5957
'flower'	1	0.538	0.539	0.526							2	0.5273	0.519	0.509							3	0.5312	0.5107	0.538							4	0.5244	0.521	0.518							5	0.549	0.5537	0.545
'flower'	1	0.5225	0.509	0.5156							2	0.5127	0.501	0.4978							3	0.5044	0.51	0.5093							4	0.514	0.5103	0.4976							5	0.505	0.5215	0.5186
'flower'	1	0.5024	0.505	0.4836							2	0.4922	0.484	0.4673							3	0.4963	0.4958	0.4895							4	0.4824	0.486	0.4473							5	0.5117	0.508	0.48
'flower'	1	0.4995	0.5024	0.448							2	0.4897	0.4746	0.4504							3	0.4902	0.4873	0.473							4	0.483	0.486	0.452							5	0.504	0.5127	0.482
'flower'	1	0.496	0.4968	0.4568							2	0.4744	0.4714	0.4597							3	0.475	0.4844	0.452							4	0.4731	0.4778	0.432							5	0.489	0.4912	0.4631
'flower'	1	0.494	0.4722	0.4392							2	0.4714	0.4736	0.4385							3	0.4685	0.4648	0.4492							4	0.4854	0.4478	0.4365							5	0.474	0.495	0.4414
'flower'	1	0.477	0.4678	0.424							2	0.482	0.4475	0.425							3	0.4631	0.486	0.4294							4	0.4692	0.4521	0.4153							5	0.466	0.4575	0.4243
'flower'	1	0.4604	0.473	0.4326							2	0.4607	0.4546	0.4106							3	0.472	0.471	0.422							4	0.4727	0.4607	0.4055							5	0.478	0.4656	0.416
'flower'	1	0.4778	0.4788	0.4277							2	0.469	0.4614	0.4043							3	0.4646	0.4702	0.441							4	0.4695	0.469	0.414							5	0.4714	0.4785	0.4119
'mini'	1	0.2274	0.2266	0.2295							2	0.2358	0.2365	0.2378							3	0.2295	0.2274	0.2296							4	0.2365	0.2352	0.2374							5	0.233	0.2307	0.2355
'mini'	1	0.2666	0.2678	0.2732							2	0.2776	0.2744	0.2795							3	0.2642	0.2637	0.2715							4	0.2764	0.2742	0.2805							5	0.2727	0.2751	0.2795
'mini'	1	0.304	0.3066	0.3167							2	0.3125	0.3162	0.3254							3	0.303	0.308	0.3174							4	0.3196	0.3188	0.329							5	0.3098	0.31	0.3198
'mini'	1	0.3428	0.3494	0.3608							2	0.3555	0.3584	0.3755							3	0.3438	0.3542	0.371							4	0.3555	0.3628	0.3794							5	0.349	0.3533	0.3696
'mini'	1	0.3826	0.3958	0.4153							2	0.397	0.4102	0.436							3	0.383	0.405	0.4285							4	0.3943	0.4036	0.4282							5	0.3835	0.3997	0.4236
'mini'	1	0.4229	0.4395	0.4666							2	0.4348	0.46	0.4883							3	0.4253	0.4558	0.4814							4	0.4263	0.4521	0.4812							5	0.4197	0.4458	0.4775
'mini'	1	0.4507	0.487	0.521							2	0.467	0.504	0.534							3	0.4626	0.4946	0.525							4	0.46	0.4954	0.5225							5	0.452	0.4917	0.527
'mini'	1	0.4797	0.5293	0.557							2	0.4937	0.538	0.5654							3	0.4866	0.5317	0.558							4	0.4888	0.527	0.5527							5	0.478	0.5273	0.5576
'mini'	1	0.507	0.5596	0.5825							2	0.5156	0.5635	0.5874							3	0.5156	0.5566	0.58							4	0.5117	0.5547	0.5757							5	0.503	0.5527	0.574
'mini'	1	0.528	0.58	0.597							2	0.532	0.5806	0.5967							3	0.5312	0.579	0.5957							4	0.53	0.5693	0.5854							5	0.521	0.569	0.5854
'mini'	1	0.596	0.616	0.6143							2	0.5923	0.6084	0.602							3	0.5854	0.6055	0.604							4	0.587	0.596	0.5947							5	0.571	0.5903	0.5874
'mini'	1	0.592	0.6064	0.6045							2	0.5933	0.599	0.593							3	0.5864	0.596	0.593							4	0.5864	0.59	0.5894							5	0.575	0.5845	0.584
'mini'	1	0.586	0.5986	0.598							2	0.5786	0.591	0.584							3	0.5713	0.583	0.5835							4	0.5728	0.586	0.5835							5	0.5625	0.577	0.5757
'mini'	1	0.573	0.5903	0.592							2	0.5703	0.5767	0.577							3	0.5576	0.5747	0.5757							4	0.5596	0.5776	0.5786							5	0.5483	0.5664	0.567
'mini'	1	0.5596	0.582	0.5815							2	0.549	0.5684	0.574							3	0.541	0.5684	0.5693							4	0.542	0.569	0.568							5	0.533	0.554	0.5576
'mini'	1	0.549	0.572	0.5757							2	0.5312	0.5576	0.565							3	0.5225	0.5596	0.5635							4	0.526	0.561	0.564							5	0.518	0.548	0.547
'mini'	1	0.5356	0.564	0.565							2	0.5146	0.5474	0.555							3	0.506	0.5483	0.552							4	0.5127	0.5474	0.5527							5	0.5034	0.537	0.5327
'mini'	1	0.5195	0.553	0.5566							2	0.501	0.537	0.5386							3	0.4949	0.5425	0.54							4	0.4968	0.5376	0.5464							5	0.492	0.524	0.5273
'mini'	1	0.507	0.545	0.546							2	0.4895	0.5264	0.534							3	0.4844	0.536	0.5327							4	0.4824	0.5356	0.536							5	0.4814	0.52	0.519
'mini'	1	0.4194	0.4622	0.4575							2	0.401	0.4487	0.4492							3	0.4136	0.4568	0.4548							4	0.4202	0.4565	0.4575							5	0.3894	0.44	0.4285
'mini'	1	0.394	0.417	0.413							2	0.384	0.4006	0.3987							3	0.3953	0.414	0.4026							4	0.372	0.414	0.4016							5	0.3706	0.3972	0.3967
'mini'	1	0.3765	0.3894	0.398							2	0.3706	0.3796	0.38							3	0.3704	0.3816	0.379							4	0.3616	0.383	0.383							5	0.3638	0.3667	0.3586
'mini'	1	0.3586	0.371	0.3704							2	0.3606	0.3594	0.3606							3	0.3513	0.3625	0.3655							4	0.3486	0.3645	0.365							5	0.3474	0.3555	0.3518
'mini'	1	0.3596	0.3606	0.3513							2	0.3455	0.3555	0.3586							3	0.347	0.3625	0.352							4	0.3594	0.3464	0.3508							5	0.3403	0.3389	0.3408
'mini'	1	0.3462	0.3467	0.3499							2	0.3447	0.349	0.3445							3	0.3335	0.352	0.349							4	0.3408	0.3423	0.3477							5	0.3315	0.3293	0.3242
'mini'	1	0.336	0.3274	0.345							2	0.3298	0.333	0.3374							3	0.331	0.3342	0.3347							4	0.3345	0.3428	0.3386							5	0.3203	0.3306	0.3232
'mini'	1	0.3286	0.3342	0.3394							2	0.335	0.3337	0.3264							3	0.3281	0.3289	0.3345							4	0.329	0.332	0.3347							5	0.3196	0.3198	0.3208
'mini'	1	0.3364	0.3274	0.3196							2	0.3267	0.3252	0.3303							3	0.3203	0.3237	0.3323							4	0.3215	0.3318	0.3276							5	0.314	0.3125	0.3176
'mini'	1	0.3142	0.3037	0.3123							2	0.312	0.299	0.3022							3	0.3071	0.3018	0.3037							4	0.2988	0.3022	0.3123							5	0.2964	0.2913	0.285
'mini'	1	0.305	0.2993	0.292							2	0.2983	0.2935	0.2805							3	0.2952	0.2905	0.297							4	0.2942	0.2935	0.2952							5	0.2883	0.2874	0.2856
'mini'	1	0.2854	0.2905	0.297							2	0.2847	0.3013	0.2827							3	0.2937	0.2837	0.2864							4	0.3005	0.2961	0.2905							5	0.2754	0.279	0.274
'mini'	1	0.2913	0.2874	0.2798							2	0.296	0.2869	0.2827							3	0.2922	0.297	0.2754							4	0.288	0.2922	0.287							5	0.2734	0.2866	0.2642
'mini'	1	0.2874	0.291	0.282							2	0.294	0.286	0.293							3	0.2917	0.29	0.2737							4	0.2898	0.28	0.2766							5	0.2815	0.2727	0.276
'mini'	1	0.2825	0.279	0.2754							2	0.2766	0.2869	0.2766							3	0.2808	0.2827	0.2856							4	0.3003	0.2808	0.2627							5	0.2703	0.2637	0.256
'mini'	1	0.2866	0.2727	0.2708							2	0.2825	0.2917	0.2583							3	0.2837	0.2783	0.2751							4	0.2815	0.277	0.2727							5	0.2786	0.2627	0.2588
'mini'	1	0.289	0.279	0.2744							2	0.2888	0.2869	0.2673							3	0.2742	0.275	0.2708							4	0.278	0.2837	0.2659							5	0.2585	0.264	0.2498
'mini'	1	0.2966	0.2844	0.2607							2	0.2852	0.286	0.2605							3	0.2815	0.2783	0.2634							4	0.2803	0.2798	0.2695							5	0.2683	0.267	0.2568
'traffic'	1	0.2612	0.261	0.265							2	0.269	0.2659	0.2712							3	0.248	0.2496	0.2524							4	0.2524	0.2489	0.252							5	0.2477	0.246	0.2482
'traffic'	1	0.3594	0.3513	0.3628							2	0.3674	0.3577	0.3665							3	0.3523	0.3442	0.3574							4	0.3472	0.3357	0.3499							5	0.3477	0.3362	0.3516
'traffic'	1	0.4612	0.4502	0.4702							2	0.4597	0.4517	0.4683							3	0.456	0.4375	0.4575							4	0.4497	0.4402	0.462							5	0.4492	0.436	0.4568
'traffic'	1	0.5347	0.5327	0.551							2	0.538	0.5303	0.5522							3	0.5312	0.5186	0.5347							4	0.5254	0.522	0.543							5	0.528	0.5225	0.5425
'traffic'	1	0.5825	0.5845	0.5977							2	0.594	0.586	0.605							3	0.5776	0.569	0.5864							4	0.576	0.582	0.5957							5	0.574	0.576	0.593
'traffic'	1	0.6133	0.614	0.621							2	0.6304	0.6216	0.636							3	0.612	0.6045	0.6196							4	0.6133	0.617	0.6284							5	0.606	0.6094	0.624
'traffic'	1	0.638	0.6313	0.643							2	0.6533	0.647	0.66							3	0.6333	0.629	0.638							4	0.634	0.6396	0.646							5	0.626	0.6313	0.644
'traffic'	1	0.652	0.6484	0.6543							2	0.6704	0.6646	0.6763							3	0.649	0.643	0.6543							4	0.6504	0.6523	0.66							5	0.6455	0.6465	0.658
'traffic'	1	0.662	0.6597	0.665							2	0.6846	0.679	0.6895							3	0.6587	0.657	0.6646							4	0.662	0.661	0.671							5	0.6597	0.6577	0.666
'traffic'	1	0.6694	0.667	0.6714							2	0.696	0.691	0.698							3	0.668	0.669	0.678							4	0.671	0.671	0.682							5	0.6724	0.668	0.6772
'traffic'	1	0.7	0.6973	0.7036							2	0.7295	0.7334	0.7373							3	0.706	0.7124	0.721							4	0.7	0.7046	0.703							5	0.709	0.71	0.7144
'traffic'	1	0.71	0.7017	0.7065							2	0.7285	0.7383	0.7437							3	0.7085	0.7197	0.723							4	0.704	0.7085	0.7114							5	0.713	0.716	0.717
'traffic'	1	0.7075	0.6997	0.703							2	0.7275	0.737	0.7427							3	0.708	0.717	0.7266							4	0.6973	0.7095	0.7104							5	0.706	0.719	0.7183
'traffic'	1	0.7	0.6973	0.703							2	0.722	0.734	0.739							3	0.7046	0.711	0.7183							4	0.6953	0.7046	0.71							5	0.702	0.71	0.7188
'traffic'	1	0.691	0.6885	0.6973							2	0.7144	0.732	0.736							3	0.7017	0.709	0.712							4	0.6895	0.6978	0.703							5	0.6904	0.706	0.7124
'traffic'	1	0.678	0.6836	0.6924							2	0.7114	0.7236	0.729							3	0.6914	0.699	0.712							4	0.6816	0.697	0.6963							5	0.684	0.6963	0.7026
'traffic'	1	0.671	0.6797	0.684							2	0.6987	0.717	0.722							3	0.6807	0.6943	0.706							4	0.671	0.69	0.692							5	0.679	0.691	0.6973
'traffic'	1	0.665	0.667	0.6777							2	0.6914	0.7104	0.711							3	0.6743	0.688	0.6973							4	0.66	0.678	0.683							5	0.668	0.685	0.695
'traffic'	1	0.661	0.6606	0.67							2	0.6865	0.698	0.7056							3	0.6724	0.6816	0.688							4	0.6553	0.6714	0.673							5	0.664	0.681	0.6855
'traffic'	1	0.5713	0.5938	0.5825							2	0.594	0.6206	0.6045							3	0.5903	0.6133	0.5957							4	0.586	0.5986	0.5923							5	0.5957	0.6123	0.6006
'traffic'	1	0.5254	0.5493	0.548							2	0.5435	0.58	0.5557							3	0.5557	0.5527	0.5566							4	0.5464	0.549	0.536							5	0.5503	0.555	0.5513
'traffic'	1	0.514	0.527	0.516							2	0.5405	0.536	0.532							3	0.5117	0.528	0.5234							4	0.5166	0.5225	0.511							5	0.524	0.5273	0.5205
'traffic'	1	0.4963	0.502	0.4983							2	0.51	0.5063	0.514							3	0.5083	0.5146	0.507							4	0.488	0.5054	0.4976							5	0.505	0.5073	0.4978
'traffic'	1	0.4966	0.4827	0.4756							2	0.486	0.4915	0.4954							3	0.4878	0.493	0.4817							4	0.481	0.4922	0.4915							5	0.4905	0.493	0.4795
'traffic'	1	0.468	0.4727	0.465							2	0.491	0.4873	0.4814							3	0.4812	0.4834	0.4807							4	0.4731	0.4688	0.471							5	0.4802	0.4744	0.4878
'traffic'	1	0.457	0.4763	0.464							2	0.4766	0.4678	0.4778							3	0.4763	0.4714	0.4646							4	0.4597	0.4714	0.461							5	0.476	0.4639	0.4644
'traffic'	1	0.4644	0.4512	0.446							2	0.4797	0.4622	0.4617							3	0.4673	0.4731	0.4453							4	0.4546	0.4478	0.4404							5	0.4634	0.455	0.4617
'traffic'	1	0.4485	0.4473	0.4521							2	0.469	0.4539	0.4521							3	0.453	0.4521	0.4458							4	0.4507	0.4578	0.4458							5	0.453	0.46	0.449
'traffic'	1	0.4	0.3958	0.3801							2	0.42	0.4102	0.3943							3	0.429	0.408	0.3943							4	0.4246	0.3938	0.397							5	0.4297	0.4	0.3965
'traffic'	1	0.3855	0.35	0.363							2	0.3928	0.3833	0.3901							3	0.3853	0.3684	0.3843							4	0.4033	0.37	0.3633							5	0.3955	0.3674	0.3691
'traffic'	1	0.3672	0.3452	0.3452							2	0.368	0.3762	0.356							3	0.3923	0.3599	0.3604							4	0.3774	0.3525	0.3506							5	0.366	0.348	0.338
'traffic'	1	0.3577	0.3545	0.3362							2	0.3691	0.3506	0.3518							3	0.3816	0.3528	0.3513							4	0.3655	0.3464	0.347							5	0.3608	0.3374	0.338
'traffic'	1	0.34	0.3198	0.323							2	0.3694	0.3438	0.3467							3	0.374	0.349	0.3413							4	0.356	0.3408	0.3406							5	0.3496	0.3425	0.336
'traffic'	1	0.3381	0.3318	0.3196							2	0.365	0.3374	0.3374							3	0.367	0.3333	0.3347							4	0.3542	0.3386	0.3306							5	0.3462	0.3442	0.3347
'traffic'	1	0.3423	0.3306	0.322							2	0.3547	0.3313	0.3345							3	0.353	0.342	0.3398							4	0.3447	0.3247	0.3254							5	0.337	0.326	0.3242
'traffic'	1	0.335	0.328	0.3225							2	0.3328	0.3357	0.3262							3	0.3455	0.3398	0.3167							4	0.3474	0.3328	0.3425							5	0.331	0.3174	0.3271
'traffic'	1	0.3347	0.337	0.303							2	0.3435	0.3452	0.3186							3	0.329	0.3447	0.3276							4	0.327	0.3318	0.322							5	0.3413	0.3337	0.3118
