# Supplementary material
Source: ML conference proceedings conference paper supplement (https://openreview.net/forum?id=qkLMTphG5-h)
Supplement: supplementary_material [file 5way_5shot_SGD_AT_Only_ALL.xlsx]

## Sheet: 5way_5shot_SGD_AT_Only_ALL
		SGD	AT_Only	ALL		average	SGD	AT_Only	ALL			SGD	AT_Only	ALL		average	SGD	AT_Only	ALL			SGD	AT_Only	ALL		average	SGD	AT_Only	ALL			SGD	AT_Only	ALL		average	SGD	AT_Only	ALL			SGD	AT_Only	ALL		average	SGD	AT_Only	ALL
'cub'	1	0.2068	0.2101	0.2142		'cub'	0.337222	0.362265	0.382659		2	0.2003	0.2034	0.2081		'cub'	0.332484	0.364195	0.385743		3	0.1997	0.2035	0.2086		'cub'	0.332211	0.357608	0.377254		4	0.2097	0.2125	0.2186		'cub'	0.335116	0.359562	0.379095		5	0.2012	0.2047	0.2103		'cub'	0.327732	0.356386	0.376646
'cub'	1	0.2087	0.217	0.2308		'flower'	0.447446	0.491659	0.533243		2	0.2032	0.2107	0.2211		'flower'	0.438473	0.480324	0.521743		3	0.2034	0.2107	0.2211		'flower'	0.443943	0.491641	0.533522		4	0.2124	0.2206	0.2307		'flower'	0.444546	0.488584	0.529962		5	0.2043	0.2118	0.2201		'flower'	0.452957	0.496149	0.539716
'cub'	1	0.2113	0.2256	0.2456		'mini'	0.379614	0.413489	0.438611		2	0.2056	0.2173	0.2382		'mini'	0.383265	0.41173	0.436319		3	0.207	0.2181	0.2333		'mini'	0.378373	0.408886	0.432892		4	0.2142	0.2279	0.2462		'mini'	0.37893	0.407951	0.431597		5	0.2085	0.2173	0.2346		'mini'	0.379089	0.405649	0.429281
'cub'	1	0.2153	0.2339	0.2651		'traffic'	0.454089	0.478349	0.506549		2	0.2095	0.2269	0.2588		'traffic'	0.463414	0.490849	0.520241		3	0.2114	0.2252	0.2482		'traffic'	0.452481	0.480051	0.510576		4	0.2197	0.2343	0.263		'traffic'	0.449041	0.474424	0.505332		5	0.2115	0.2235	0.2507		'traffic'	0.45183	0.474641	0.506822
'cub'	1	0.2194	0.2438	0.2842		Average	0.404593	0.436441	0.465266		2	0.214	0.2352	0.2793		Average	0.404409	0.436774	0.466011		3	0.2137	0.2325	0.27		Average	0.401752	0.434547	0.463561		4	0.2231	0.2446	0.2805		Average	0.401908	0.43263	0.461497		5	0.2141	0.233	0.272		Average	0.402902	0.433206	0.463116
'cub'	1	0.2227	0.2527	0.3037				0.031848			2	0.2172	0.2456	0.301				0.0323655			3	0.2183	0.2407	0.2893				0.0327946			4	0.2266	0.2524	0.3042				0.0307223			5	0.2162	0.2423	0.2927				0.0303041
'cub'	1	0.2258	0.2622	0.323							2	0.221	0.2576	0.3203							3	0.2213	0.2502	0.3145							4	0.2299	0.2607	0.3264							5	0.219	0.2505	0.3123
'cub'	1	0.2302	0.274	0.346		Top1 Acc.	SGD	AT_Only	ALL		2	0.2239	0.2688	0.3406		Top1 Acc.	SGD	AT_Only	ALL		3	0.2246	0.2588	0.3364		Top1 Acc.	SGD	AT_Only	ALL		4	0.2324	0.2715	0.3481		Top1 Acc.	SGD	AT_Only	ALL		5	0.2223	0.261	0.334		Top1 Acc.	SGD	AT_Only	ALL
'cub'	1	0.2327	0.284	0.3623		'cub'	0.5127	0.5186	0.5166		2	0.2269	0.2798	0.3582		'cub'	0.508	0.5293	0.5303		3	0.2267	0.2705	0.358		'cub'	0.5093	0.5205	0.5127		4	0.2357	0.2834	0.3655		'cub'	0.506	0.512	0.513		5	0.2255	0.2722	0.3555		'cub'	0.496	0.5117	0.5137
'cub'	1	0.2367	0.294	0.3784		'flower'	0.712	0.7456	0.75		2	0.2306	0.2922	0.375		'flower'	0.6973	0.7285	0.736		3	0.23	0.2827	0.3743		'flower'	0.7065	0.747	0.7495		4	0.2408	0.2913	0.3833		'flower'	0.6978	0.74	0.74		5	0.2284	0.2812	0.3716		'flower'	0.719	0.75	0.7554
'cub'	1	0.2744	0.3862	0.4824		'mini'	0.6294	0.628	0.6313		2	0.2693	0.3816	0.4846		'mini'	0.627	0.625	0.626		3	0.267	0.383	0.4702		'mini'	0.6245	0.6206	0.6196		4	0.2744	0.3909	0.4739		'mini'	0.613	0.612	0.614		5	0.264	0.38	0.4692		'mini'	0.6196	0.6133	0.6133
'cub'	1	0.3044	0.4495	0.5024		'traffic'	0.7188	0.7246	0.729		2	0.3003	0.4468	0.5093		'traffic'	0.743	0.752	0.758		3	0.3013	0.4385	0.493		'traffic'	0.721	0.738	0.7393		4	0.3086	0.4475	0.493		'traffic'	0.718	0.7266	0.7363		5	0.2961	0.4353	0.4902		'traffic'	0.7256	0.733	0.7393
'cub'	1	0.3342	0.477	0.508		Average	0.643225	0.6542	0.656725		2	0.3254	0.4814	0.5205		Average	0.643825	0.6587	0.662575		3	0.3267	0.4663	0.499		Average	0.640325	0.656525	0.655275		4	0.3347	0.4707	0.5024		Average	0.6337	0.64765	0.650825		5	0.3218	0.4631	0.498		Average	0.64005	0.652	0.655425
'cub'	1	0.3538	0.4893	0.5107				0.010975			2	0.3472	0.4958	0.5244				0.014875			3	0.348	0.4822	0.5044				0.0162			4	0.3547	0.4832	0.5093				0.01395			5	0.3416	0.4807	0.5005				0.01195
'cub'	1	0.3684	0.4968	0.513							2	0.363	0.507	0.528							3	0.3647	0.4878	0.5073							4	0.3696	0.4902	0.511							5	0.357	0.4888	0.503
'cub'	1	0.3853	0.502	0.5127		Top-N%	SGD	AT_Only	ALL		2	0.3748	0.513	0.53		Top-N%	SGD	AT_Only	ALL		3	0.3792	0.4949	0.5107		Top-N%	SGD	AT_Only	ALL		4	0.3828	0.4932	0.511		Top-N%	SGD	AT_Only	ALL		5	0.3704	0.492	0.5034		Top-N%	SGD	AT_Only	ALL
'cub'	1	0.3962	0.5034	0.514		'cub'	0.46188	0.505167	0.510973		2	0.3838	0.518	0.528		'cub'	0.45516	0.513627	0.521587		3	0.3882	0.501	0.51		'cub'	0.454793	0.501887	0.506067		4	0.3933	0.496	0.513		'cub'	0.45464	0.498813	0.505347		5	0.3792	0.4937	0.5063		'cub'	0.446833	0.499667	0.50382
'cub'	1	0.4055	0.5073	0.5146		'flower'	0.65516	0.729867	0.73906		2	0.3933	0.5195	0.5303		'flower'	0.64216	0.713247	0.72296		3	0.3967	0.504	0.5117		'flower'	0.652987	0.732313	0.740293		4	0.402	0.499	0.5127		'flower'	0.64494	0.7216	0.73316		5	0.389	0.4949	0.507		'flower'	0.663807	0.73674	0.745944
'cub'	1	0.412	0.5083	0.5146		'mini'	0.55488	0.608607	0.616713		2	0.3992	0.522	0.5293		'mini'	0.555773	0.60148	0.60958		3	0.4028	0.5054	0.5107		'mini'	0.552047	0.599767	0.606767		4	0.4092	0.5015	0.513		'mini'	0.5467	0.593247	0.59978		5	0.3955	0.4988	0.508		'mini'	0.5496	0.588713	0.597093
'cub'	1	0.4502	0.5156	0.5156		'traffic'	0.67016	0.69988	0.705193		2	0.436	0.5293	0.5254		'traffic'	0.68652	0.722573	0.72944		3	0.436	0.5156	0.5127		'traffic'	0.671353	0.70708	0.71524		4	0.4402	0.512	0.5103		'traffic'	0.666673	0.69722	0.707627		5	0.429	0.509	0.5137		'traffic'	0.671767	0.698473	0.710033
'cub'	1	0.4648	0.515	0.5156		Average	0.58552	0.63588	0.642985		2	0.4531	0.5254	0.5195		Average	0.584903	0.637732	0.645892		3	0.4517	0.5156	0.511		Average	0.582795	0.635262	0.642092		4	0.4543	0.5117	0.51		Average	0.578238	0.62772	0.636478		5	0.4456	0.5117	0.509		Average	0.583002	0.630898	0.639223
'cub'	1	0.474	0.5186	0.5166				0.05036			2	0.4678	0.521	0.521				0.0528283			3	0.4639	0.5205	0.512				0.0524667			4	0.4663	0.5103	0.51				0.0494817			5	0.4578	0.5107	0.5127				0.0478967
'cub'	1	0.486	0.515	0.5117							2	0.4792	0.52	0.5225							3	0.4763	0.5137	0.5093							4	0.4778	0.5103	0.504							5	0.4692	0.5103	0.5054
'cub'	1	0.4963	0.5083	0.5103		15					2	0.4922	0.5137	0.5166							3	0.488	0.507	0.5063							4	0.4836	0.5044	0.5005							5	0.4802	0.5083	0.505
'cub'	1	0.5034	0.505	0.505		'cub'	0.3853	0.4893	0.4998		2	0.501	0.5137	0.515		'cub'	0.3748	0.4958	0.504		3	0.4956	0.5024	0.4985		'cub'	0.3792	0.4822	0.493		4	0.4922	0.5024	0.4937		'cub'	0.3828	0.4788	0.4863		5	0.4893	0.503	0.4983		'cub'	0.3704	0.4807	0.4902
'cub'	1	0.508	0.5024	0.4998		'flower'	0.5547	0.702	0.728		2	0.507	0.5054	0.504		'flower'	0.5444	0.682	0.706		3	0.503	0.498	0.4944		'flower'	0.553	0.706	0.7256		4	0.5015	0.499	0.4863		'flower'	0.5522	0.6895	0.7197		5	0.4924	0.505	0.4968		'flower'	0.569	0.707	0.732
'cub'	1	0.5117	0.501	0.4966		'mini'	0.4448	0.58	0.586		2	0.508	0.504	0.494		'mini'	0.4548	0.5537	0.5728		3	0.5063	0.4966	0.4844		'mini'	0.4487	0.5645	0.571		4	0.5044	0.4902	0.4702		'mini'	0.4468	0.556	0.5713		5	0.4949	0.4988	0.4885		'mini'	0.4468	0.551	0.5547
'cub'	1	0.5127	0.4895	0.4792		'traffic'	0.59	0.654	0.6343		2	0.507	0.4966	0.4795		'traffic'	0.591	0.6636	0.654		3	0.5093	0.4836	0.4756		'traffic'	0.5825	0.656	0.661		4	0.506	0.4788	0.4692		'traffic'	0.579	0.645	0.6387		5	0.496	0.4893	0.4836		'traffic'	0.583	0.6504	0.645
'cub'	1	0.4907	0.4138	0.3872		Average	0.4937	0.606325	0.612025		2	0.4897	0.4138	0.3865		Average	0.49125	0.598775	0.6092		3	0.492	0.4138	0.3806		Average	0.49085	0.602175	0.61265		4	0.4775	0.4001	0.378		Average	0.4902	0.592325	0.604		5	0.481	0.4036	0.3733		Average	0.4923	0.597275	0.605475
'cub'	1	0.4314	0.206	0.2374							2	0.4353	0.2068	0.2434							3	0.4329	0.2101	0.2443							4	0.4285	0.2068	0.2354							5	0.433	0.2067	0.2378
'cub'	1	0.364	0.2006	0.2235							2	0.374	0.2001	0.2341							3	0.3716	0.1996	0.2335							4	0.3484	0.2001	0.231							5	0.3672	0.2013	0.2373
'cub'	1	0.3088	0.2013	0.22							2	0.3108	0.1991	0.2194							3	0.3086	0.2014	0.2115							4	0.3176	0.2025	0.2096							5	0.2969	0.2001	0.2043
'cub'	1	0.2228	0.1948	0.2035							2	0.2206	0.2034	0.2054							3	0.223	0.1951	0.2039							4	0.2216	0.2014	0.2092							5	0.2234	0.2	0.2053
'cub'	1	0.2051	0.199	0.2025							2	0.207	0.2003	0.199							3	0.2006	0.2028	0.2007							4	0.2034	0.2017	0.2043							5	0.2019	0.2023	0.2064
'cub'	1	0.2036	0.2014	0.2115							2	0.1996	0.199	0.2053							3	0.2021	0.199	0.2051							4	0.1995	0.2012	0.2037							5	0.202	0.2	0.2076
'cub'	1	0.2001	0.2035	0.1957							2	0.202	0.1996	0.1971							3	0.2007	0.2006	0.2014							4	0.2042	0.2003	0.1969							5	0.2006	0.2024	0.2024
'cub'	1	0.1998	0.1959	0.201							2	0.2031	0.2014	0.1998							3	0.1995	0.2001	0.2025							4	0.1985	0.1992	0.1984							5	0.2001	0.199	0.2091
'flower'	1	0.2063	0.2142	0.227							2	0.2028	0.2095	0.2205							3	0.1984	0.2084	0.2195							4	0.2153	0.2217	0.2327							5	0.204	0.2133	0.2251
'flower'	1	0.2123	0.2312	0.26							2	0.2096	0.2251	0.25							3	0.2076	0.2229	0.2527							4	0.2208	0.2382	0.2637							5	0.2114	0.23	0.2593
'flower'	1	0.22	0.2507	0.302							2	0.2156	0.2411	0.284							3	0.2135	0.2413	0.2898							4	0.2291	0.255	0.2996							5	0.2198	0.2491	0.2954
'flower'	1	0.2274	0.2725	0.3428							2	0.2234	0.2593	0.3252							3	0.2217	0.2637	0.3328							4	0.2358	0.2747	0.3406							5	0.2273	0.2683	0.3438
'flower'	1	0.235	0.2966	0.389							2	0.2299	0.279	0.3748							3	0.2294	0.2844	0.378							4	0.2424	0.295	0.3845							5	0.2352	0.2898	0.393
'flower'	1	0.2422	0.3164	0.4316							2	0.237	0.3013	0.4224							3	0.2374	0.3074	0.422							4	0.2498	0.3162	0.4263							5	0.2427	0.313	0.4385
'flower'	1	0.2517	0.339	0.4734							2	0.2451	0.3245	0.4658							3	0.2454	0.3303	0.467							4	0.2578	0.3381	0.4668							5	0.2517	0.3403	0.4832
'flower'	1	0.26	0.3633	0.5127							2	0.2534	0.3477	0.502							3	0.2542	0.355	0.5093							4	0.2664	0.3596	0.504							5	0.259	0.3682	0.519
'flower'	1	0.2683	0.388	0.5425							2	0.2605	0.3748	0.5356							3	0.2625	0.3787	0.5454							4	0.276	0.3826	0.5356							5	0.269	0.391	0.552
'flower'	1	0.2776	0.4114	0.5684							2	0.2676	0.4	0.559							3	0.2708	0.402	0.574							4	0.283	0.408	0.5654							5	0.2788	0.4175	0.5786
'flower'	1	0.362	0.5776	0.685							2	0.346	0.568	0.6685							3	0.3535	0.5845	0.6943							4	0.3608	0.5757	0.6753							5	0.369	0.5894	0.692
'flower'	1	0.4297	0.647	0.713							2	0.4175	0.638	0.6953							3	0.4204	0.658	0.7183							4	0.423	0.643	0.707							5	0.4375	0.66	0.7188
'flower'	1	0.474	0.682	0.724							2	0.4653	0.668	0.706							3	0.4702	0.6885	0.728							4	0.4675	0.675	0.7197							5	0.4868	0.691	0.732
'flower'	1	0.51	0.702	0.732							2	0.5005	0.682	0.7134							3	0.503	0.706	0.7344							4	0.504	0.6895	0.727							5	0.5254	0.707	0.739
'flower'	1	0.535	0.7114	0.733							2	0.5234	0.694	0.719							3	0.5303	0.717	0.7363							4	0.53	0.703	0.7305							5	0.5493	0.7183	0.7437
'flower'	1	0.5547	0.7163	0.7344							2	0.5444	0.7	0.7236							3	0.5513	0.7236	0.7373							4	0.545	0.7124	0.734							5	0.567	0.7275	0.7446
'flower'	1	0.5674	0.724	0.7363							2	0.5605	0.707	0.726							3	0.5684	0.73	0.74							4	0.56	0.7173	0.736							5	0.5835	0.731	0.745
'flower'	1	0.579	0.726	0.738							2	0.572	0.711	0.726							3	0.5786	0.7314	0.742							4	0.5713	0.722	0.7373							5	0.5957	0.7354	0.747
'flower'	1	0.59	0.7285	0.7393							2	0.5825	0.7163	0.7266							3	0.5884	0.734	0.7427							4	0.5806	0.7256	0.7373							5	0.6025	0.74	0.748
'flower'	1	0.64	0.743	0.746							2	0.624	0.726	0.7305							3	0.6357	0.747	0.7466							4	0.631	0.74	0.7383							5	0.645	0.75	0.7524
'flower'	1	0.6626	0.745	0.749							2	0.647	0.7285	0.7305							3	0.659	0.7466	0.746							4	0.65	0.734	0.7383							5	0.665	0.748	0.7544
'flower'	1	0.677	0.7456	0.745							2	0.6655	0.7285	0.736							3	0.6763	0.746	0.7495							4	0.666	0.7334	0.738							5	0.685	0.7495	0.7505
'flower'	1	0.693	0.7344	0.7466							2	0.678	0.7275	0.7275							3	0.689	0.7417	0.749							4	0.6777	0.727	0.732							5	0.696	0.745	0.7554
'flower'	1	0.701	0.7393	0.75							2	0.6885	0.7188	0.723							3	0.6987	0.7407	0.7476							4	0.6865	0.7246	0.734							5	0.708	0.7427	0.7524
'flower'	1	0.7056	0.74	0.741							2	0.6943	0.722	0.724							3	0.705	0.7393	0.746							4	0.692	0.7275	0.733							5	0.7134	0.739	0.749
'flower'	1	0.709	0.733	0.7383							2	0.6973	0.7153	0.717							3	0.7065	0.7344	0.7334							4	0.6963	0.726	0.74							5	0.717	0.746	0.747
'flower'	1	0.7104	0.7305	0.729							2	0.696	0.7104	0.7153							3	0.7065	0.722	0.7256							4	0.6953	0.7207	0.722							5	0.718	0.731	0.7427
'flower'	1	0.712	0.729	0.728							2	0.6934	0.7114	0.704							3	0.706	0.725	0.7124							4	0.6978	0.721	0.7183							5	0.719	0.7407	0.732
'flower'	1	0.6934	0.6426	0.599							2	0.6655	0.632	0.572							3	0.688	0.6465	0.609							4	0.6724	0.647	0.594							5	0.69	0.657	0.6025
'flower'	1	0.6323	0.2151	0.328							2	0.6235	0.2073	0.3071							3	0.6357	0.2246	0.3225							4	0.645	0.2191	0.3037							5	0.65	0.2137	0.3357
'flower'	1	0.554	0.1976	0.2698							2	0.543	0.2006	0.295							3	0.553	0.2051	0.3105							4	0.5522	0.2006	0.2876							5	0.569	0.2019	0.2964
'flower'	1	0.4036	0.2007	0.225							2	0.4033	0.2	0.2286							3	0.4211	0.1989	0.2222							4	0.4268	0.2028	0.2485							5	0.4268	0.202	0.242
'flower'	1	0.2482	0.1995	0.213							2	0.2429	0.2	0.2246							3	0.2471	0.2007	0.22							4	0.2335	0.1995	0.2124							5	0.2388	0.2019	0.2362
'flower'	1	0.2073	0.1974	0.2151							2	0.2092	0.1974	0.2075							3	0.2009	0.1982	0.2164							4	0.2046	0.1965	0.2096							5	0.2018	0.1967	0.2163
'flower'	1	0.2017	0.1968	0.2118							2	0.1971	0.1996	0.1995							3	0.1952	0.2009	0.2095							4	0.2019	0.2	0.2179							5	0.1995	0.1998	0.196
'flower'	1	0.202	0.2057	0.2023							2	0.2021	0.1981	0.2124							3	0.198	0.199	0.2057							4	0.2028	0.2012	0.2191							5	0.1963	0.2067	0.2063
'flower'	1	0.1998	0.1981	0.2087							2	0.1959	0.202	0.2063							3	0.1992	0.207	0.2046							4	0.1978	0.2041	0.1986							5	0.2052	0.2058	0.2043
'mini'	1	0.1991	0.2041	0.211							2	0.2087	0.2137	0.2216							3	0.2001	0.2057	0.213							4	0.207	0.2128	0.2196							5	0.2056	0.2108	0.2184
'mini'	1	0.2028	0.2152	0.2317							2	0.2133	0.224	0.24							3	0.2047	0.2164	0.2336							4	0.212	0.2245	0.2385							5	0.21	0.222	0.2395
'mini'	1	0.2079	0.2261	0.256							2	0.2186	0.2346	0.2605							3	0.2091	0.2273	0.2524							4	0.2167	0.2329	0.2617							5	0.2144	0.2333	0.2615
'mini'	1	0.2126	0.2388	0.2815							2	0.2236	0.2446	0.2844							3	0.2144	0.2383	0.276							4	0.2216	0.2434	0.2856							5	0.2191	0.247	0.2825
'mini'	1	0.2184	0.2522	0.307							2	0.2264	0.2576	0.311							3	0.2201	0.2495	0.3025							4	0.2255	0.257	0.3098							5	0.2246	0.2598	0.308
'mini'	1	0.224	0.2654	0.337							2	0.2318	0.2698	0.3394							3	0.2245	0.2625	0.3303							4	0.231	0.2708	0.3381							5	0.2306	0.2705	0.3335
'mini'	1	0.2273	0.2776	0.3691							2	0.2362	0.2815	0.3696							3	0.2296	0.2744	0.363							4	0.2346	0.2837	0.365							5	0.2354	0.282	0.3672
'mini'	1	0.2327	0.2913	0.4001							2	0.2407	0.2964	0.4016							3	0.234	0.2883	0.3948							4	0.2402	0.2969	0.3943							5	0.2412	0.2925	0.3987
'mini'	1	0.2393	0.3054	0.4302							2	0.2465	0.3103	0.4304							3	0.2382	0.3025	0.4229							4	0.2456	0.309	0.425							5	0.247	0.3076	0.4304
'mini'	1	0.2443	0.32	0.4563							2	0.251	0.3242	0.4597							3	0.2433	0.3186	0.4492							4	0.2527	0.3228	0.4487							5	0.2524	0.3206	0.4592
'mini'	1	0.29	0.4626	0.588							2	0.2993	0.467	0.581							3	0.2893	0.4607	0.5815							4	0.2986	0.4575	0.5747							5	0.2944	0.464	0.5806
'mini'	1	0.3335	0.5435	0.6157							2	0.341	0.5454	0.6133							3	0.3335	0.5415	0.6074							4	0.3406	0.529	0.599							5	0.3389	0.5356	0.602
'mini'	1	0.3706	0.58	0.625							2	0.379	0.5757	0.6206							3	0.373	0.576	0.6143							4	0.3762	0.569	0.6094							5	0.3752	0.572	0.606
'mini'	1	0.4036	0.595	0.6274							2	0.4082	0.5967	0.6235							3	0.4072	0.593	0.616							4	0.4067	0.5845	0.61							5	0.4028	0.586	0.6084
'mini'	1	0.4248	0.6084	0.6294							2	0.4346	0.6055	0.623							3	0.4275	0.6006	0.6187							4	0.4307	0.5957	0.611							5	0.4265	0.5947	0.6094
'mini'	1	0.4448	0.6123	0.6294							2	0.4548	0.6143	0.6235							3	0.4487	0.6074	0.6196							4	0.4468	0.602	0.6113							5	0.4468	0.5986	0.612
'mini'	1	0.4612	0.6187	0.63							2	0.4695	0.619	0.625							3	0.4658	0.6104	0.6196							4	0.462	0.6055	0.6113							5	0.4626	0.6025	0.6133
'mini'	1	0.473	0.6196	0.6313							2	0.482	0.6196	0.626							3	0.479	0.6123	0.618							4	0.4756	0.605	0.612							5	0.4746	0.6045	0.613
'mini'	1	0.483	0.6226	0.6304							2	0.4905	0.6235	0.624							3	0.4895	0.6133	0.6187							4	0.4863	0.6084	0.614							5	0.4863	0.606	0.6133
'mini'	1	0.5347	0.628	0.6255							2	0.5435	0.625	0.618							3	0.5356	0.6206	0.6157							4	0.533	0.612	0.6074							5	0.535	0.6133	0.606
'mini'	1	0.557	0.625	0.6216							2	0.56	0.6187	0.612							3	0.5596	0.62	0.6147							4	0.5522	0.609	0.605							5	0.556	0.607	0.602
'mini'	1	0.5757	0.621	0.612							2	0.577	0.6147	0.604							3	0.5757	0.6147	0.611							4	0.5693	0.605	0.5977							5	0.5723	0.6006	0.5903
'mini'	1	0.594	0.6196	0.604							2	0.595	0.6016	0.597							3	0.5913	0.607	0.5947							4	0.586	0.604	0.585							5	0.589	0.5913	0.577
'mini'	1	0.6123	0.607	0.595							2	0.612	0.5957	0.58							3	0.6055	0.596	0.5806							4	0.599	0.593	0.5776							5	0.6045	0.5835	0.5684
'mini'	1	0.623	0.602	0.586							2	0.6196	0.5835	0.5728							3	0.6167	0.585	0.571							4	0.6064	0.5796	0.5713							5	0.6133	0.566	0.5547
'mini'	1	0.627	0.5884	0.5703							2	0.626	0.575	0.56							3	0.6216	0.5757	0.5566							4	0.6113	0.57	0.554							5	0.6177	0.5537	0.548
'mini'	1	0.629	0.5815	0.556							2	0.627	0.5537	0.5415							3	0.624	0.5645	0.536							4	0.611	0.556	0.544							5	0.6196	0.551	0.531
'mini'	1	0.6294	0.5615	0.5327							2	0.625	0.5444	0.5264							3	0.6245	0.541	0.5156							4	0.613	0.5376	0.5254							5	0.618	0.5356	0.507
'mini'	1	0.5947	0.408	0.3723							2	0.5825	0.39	0.375							3	0.5825	0.3994	0.3706							4	0.572	0.4153	0.3643							5	0.573	0.3938	0.3484
'mini'	1	0.4844	0.2056	0.2257							2	0.4722	0.2063	0.226							3	0.4607	0.2024	0.2302							4	0.4766	0.2036	0.2264							5	0.4753	0.2039	0.2294
'mini'	1	0.3696	0.1991	0.2273							2	0.361	0.1993	0.2284							3	0.3604	0.2034	0.2301							4	0.3625	0.2	0.236							5	0.3572	0.1997	0.2307
'mini'	1	0.2969	0.1979	0.208							2	0.298	0.2	0.2152							3	0.291	0.2008	0.2194							4	0.2996	0.2014	0.2166							5	0.2952	0.1993	0.2184
'mini'	1	0.2192	0.2017	0.1991							2	0.2252	0.199	0.202							3	0.2179	0.2	0.2003							4	0.2166	0.1993	0.207							5	0.2139	0.2008	0.2076
'mini'	1	0.2046	0.197	0.2029							2	0.2007	0.1993	0.205							3	0.1998	0.1975	0.2037							4	0.2013	0.1984	0.1997							5	0.2004	0.2004	0.2024
'mini'	1	0.2012	0.2	0.2032							2	0.2001	0.2013	0.2008							3	0.2004	0.1998	0.204							4	0.1996	0.2004	0.1951							5	0.1995	0.2023	0.2026
'mini'	1	0.2001	0.2	0.204							2	0.2006	0.2012	0.2004							3	0.2019	0.2031	0.2043							4	0.1997	0.198	0.2085							5	0.1996	0.1998	0.1984
'mini'	1	0.2	0.197	0.1965							2	0.1997	0.2019	0.2012							3	0.1992	0.1992	0.207							4	0.2009	0.2012	0.2091							5	0.1984	0.197	0.2042
'traffic'	1	0.2091	0.2172	0.2266							2	0.2129	0.2202	0.2316							3	0.2009	0.206	0.2169							4	0.2051	0.2103	0.2197							5	0.2014	0.2065	0.2167
'traffic'	1	0.2158	0.2322	0.259							2	0.2196	0.2368	0.2676							3	0.206	0.221	0.249							4	0.2087	0.2239	0.2542							5	0.2062	0.2206	0.2473
'traffic'	1	0.2234	0.2512	0.3083							2	0.227	0.2566	0.3184							3	0.2124	0.2396	0.3027							4	0.2158	0.2428	0.2983							5	0.212	0.239	0.2937
'traffic'	1	0.2301	0.275	0.3608							2	0.2335	0.2874	0.368							3	0.2188	0.267	0.3542							4	0.2212	0.266	0.3499							5	0.2192	0.2607	0.3486
'traffic'	1	0.2372	0.304	0.4146							2	0.243	0.313	0.4226							3	0.2279	0.2969	0.4072							4	0.2283	0.2932	0.4045							5	0.2267	0.2913	0.4053
'traffic'	1	0.2462	0.3289	0.4631							2	0.2532	0.339	0.4692							3	0.2374	0.3232	0.4546							4	0.238	0.319	0.4514							5	0.2344	0.3186	0.4534
'traffic'	1	0.2551	0.361	0.5034							2	0.2642	0.3667	0.5063							3	0.2454	0.354	0.4954							4	0.2458	0.3486	0.4915							5	0.2433	0.3481	0.5005
'traffic'	1	0.2664	0.3918	0.5366							2	0.2764	0.3972	0.5396							3	0.2551	0.3857	0.528							4	0.2576	0.38	0.5254							5	0.2527	0.3835	0.535
'traffic'	1	0.2764	0.4172	0.5664							2	0.2864	0.425	0.5654							3	0.2678	0.4124	0.552							4	0.2678	0.409	0.5527							5	0.2656	0.4084	0.559
'traffic'	1	0.2883	0.4465	0.592							2	0.297	0.4526	0.5854							3	0.2817	0.4348	0.5757							4	0.2803	0.4338	0.577							5	0.2776	0.4348	0.5845
'traffic'	1	0.402	0.601	0.6787							2	0.4128	0.6016	0.6855							3	0.3992	0.5913	0.6714							4	0.3926	0.5947	0.668							5	0.3933	0.5947	0.674
'traffic'	1	0.4846	0.654	0.706							2	0.4895	0.6636	0.7183							3	0.4788	0.65	0.699							4	0.4705	0.649	0.696							5	0.474	0.647	0.6978
'traffic'	1	0.535	0.6816	0.718							2	0.5347	0.6934	0.733							3	0.527	0.675	0.714							4	0.521	0.673	0.709							5	0.527	0.675	0.71
'traffic'	1	0.569	0.6997	0.7227							2	0.568	0.7124	0.7437							3	0.5615	0.6914	0.7227							4	0.5566	0.6895	0.7217							5	0.56	0.69	0.718
'traffic'	1	0.59	0.709	0.7246							2	0.591	0.7256	0.748							3	0.5825	0.7036	0.726							4	0.579	0.7007	0.728							5	0.583	0.698	0.7236
'traffic'	1	0.607	0.7134	0.727							2	0.609	0.7324	0.751							3	0.599	0.7095	0.7324							4	0.5977	0.7095	0.732							5	0.599	0.708	0.7295
'traffic'	1	0.621	0.718	0.729							2	0.62	0.7383	0.7544							3	0.612	0.7134	0.7354							4	0.6104	0.717	0.7354							5	0.61	0.7124	0.733
'traffic'	1	0.6304	0.719	0.727							2	0.631	0.7446	0.758							3	0.6226	0.721	0.7373							4	0.6216	0.721	0.736							5	0.622	0.7173	0.7334
'traffic'	1	0.6353	0.723	0.7275							2	0.6406	0.747	0.758							3	0.631	0.7246	0.7393							4	0.629	0.7266	0.7363							5	0.631	0.7217	0.7393
'traffic'	1	0.676	0.7246	0.7275							2	0.693	0.752	0.7554							3	0.6733	0.738	0.739							4	0.6733	0.724	0.7334							5	0.6724	0.733	0.7344
'traffic'	1	0.6914	0.7246	0.719							2	0.714	0.75	0.748							3	0.692	0.735	0.737							4	0.692	0.7246	0.7227							5	0.6924	0.7227	0.7275
'traffic'	1	0.703	0.7124	0.7036							2	0.73	0.7456	0.7363							3	0.704	0.728	0.725							4	0.7	0.7144	0.712							5	0.708	0.718	0.7173
'traffic'	1	0.711	0.701	0.68							2	0.7397	0.7334	0.713							3	0.7114	0.721	0.7026							4	0.7114	0.7075	0.6855							5	0.7183	0.7036	0.6953
'traffic'	1	0.7144	0.6904	0.653							2	0.743	0.715	0.685							3	0.718	0.717	0.6865							4	0.7144	0.6895	0.6597							5	0.721	0.693	0.6724
'traffic'	1	0.7153	0.6685	0.6343							2	0.742	0.7046	0.654							3	0.719	0.695	0.661							4	0.7173	0.667	0.6387							5	0.725	0.6743	0.645
'traffic'	1	0.7188	0.659	0.6094							2	0.742	0.6807	0.63							3	0.7207	0.6777	0.6353							4	0.718	0.645	0.6147							5	0.7256	0.6597	0.618
'traffic'	1	0.7144	0.6333	0.592							2	0.7397	0.66	0.617							3	0.721	0.656	0.6206							4	0.714	0.6313	0.5977							5	0.7236	0.6504	0.599
'traffic'	1	0.7134	0.616	0.569							2	0.7344	0.643	0.595							3	0.7183	0.64	0.5913							4	0.713	0.624	0.577							5	0.7246	0.624	0.5815
'traffic'	1	0.611	0.504	0.4612							2	0.6284	0.51	0.4802							3	0.6455	0.5303	0.471							4	0.609	0.52	0.4639							5	0.6206	0.4995	0.4495
'traffic'	1	0.517	0.2141	0.2422							2	0.519	0.2158	0.256							3	0.522	0.2094	0.2407							4	0.5015	0.2084	0.2444							5	0.5205	0.2118	0.2452
'traffic'	1	0.43	0.1996	0.2374							2	0.4636	0.1985	0.2307							3	0.4534	0.1971	0.2437							4	0.4485	0.198	0.2385							5	0.4487	0.1971	0.2285
'traffic'	1	0.3416	0.2003	0.2118							2	0.3347	0.2013	0.2072							3	0.3499	0.2003	0.2157							4	0.332	0.2006	0.2029							5	0.3428	0.2014	0.2109
'traffic'	1	0.218	0.202	0.2092							2	0.2225	0.2013	0.206							3	0.2178	0.198	0.2124							4	0.2197	0.1996	0.2186							5	0.2256	0.2017	0.2186
'traffic'	1	0.2037	0.2054	0.2							2	0.1975	0.2029	0.2054							3	0.2001	0.2019	0.2028							4	0.2043	0.1965	0.2062							5	0.2068	0.2004	0.2037
'traffic'	1	0.2009	0.2001	0.2036							2	0.1992	0.1962	0.2041							3	0.2041	0.197	0.1963							4	0.199	0.2006	0.2034							5	0.1991	0.1984	0.2086
'traffic'	1	0.2006	0.1959	0.193							2	0.1964	0.2017	0.2026							3	0.2006	0.1989	0.1981							4	0.1984	0.1982	0.1919							5	0.2031	0.1991	0.1991
'traffic'	1	0.1985	0.204	0.2048							2	0.1974	0.196	0.199							3	0.2037	0.2009	0.1991							4	0.2017	0.1969	0.1991							5	0.2012	0.198	0.1953
