# Supplementary material
Source: ML conference proceedings conference paper supplement (https://openreview.net/forum?id=qkLMTphG5-h)
Supplement: supplementary_material [file 5way_5shot_SGD_AT_Only_ALL_Checkpoint_Last.xlsx]

## Sheet: 5way_5shot_SGD_AT_Only_ALL
		SGD	AT_Only	ALL		average	SGD	AT_Only	ALL			SGD	AT_Only	ALL		average	SGD	AT_Only	ALL			SGD	AT_Only	ALL		average	SGD	AT_Only	ALL			SGD	AT_Only	ALL		average	SGD	AT_Only	ALL			SGD	AT_Only	ALL		average	SGD	AT_Only	ALL
'cub'	1	0.1965	0.2	0.2056		'cub'	0.312349	0.343022	0.369424		2	0.1992	0.2014	0.2043		'cub'	0.313395	0.345824	0.371697		3	0.2034	0.2067	0.2123		'cub'	0.312732	0.342249	0.367549		4	0.1993	0.2014	0.2086		'cub'	0.313049	0.339081	0.363346		5	0.1925	0.1938	0.1985		'cub'	0.305238	0.33743	0.363849
'cub'	1	0.1986	0.2062	0.2192		'flower'	0.405924	0.4542	0.502968		2	0.2001	0.2051	0.218		'flower'	0.39943	0.445835	0.495289		3	0.2057	0.2129	0.2217		'flower'	0.411862	0.459308	0.511743		4	0.2013	0.209	0.2208		'flower'	0.406038	0.452678	0.50133		5	0.1938	0.1993	0.2126		'flower'	0.420451	0.464614	0.515127
'cub'	1	0.2006	0.2133	0.2354		'mini'	0.3486	0.38943	0.425014		2	0.2025	0.2118	0.2318		'mini'	0.35607	0.391305	0.423727		3	0.2079	0.2179	0.2357		'mini'	0.348438	0.385865	0.417646		4	0.2036	0.2147	0.2404		'mini'	0.353184	0.38833	0.418692		5	0.1956	0.2062	0.2288		'mini'	0.339195	0.375595	0.40653
'cub'	1	0.2036	0.2191	0.2554		'traffic'	0.419859	0.46003	0.497776		2	0.204	0.2181	0.2546		'traffic'	0.425797	0.466959	0.505043		3	0.2097	0.2227	0.2534		'traffic'	0.420524	0.460703	0.498535		4	0.2056	0.2211	0.2576		'traffic'	0.41397	0.454862	0.493281		5	0.1968	0.2123	0.2455		'traffic'	0.421732	0.458124	0.498338
'cub'	1	0.2062	0.2272	0.2754		Average	0.371683	0.41167	0.448795		2	0.2072	0.2249	0.274		Average	0.373673	0.412481	0.448939		3	0.2114	0.2307	0.2722		Average	0.373389	0.412031	0.448868		4	0.2078	0.2296	0.2793		Average	0.37156	0.408738	0.444162		5	0.199	0.2191	0.266		Average	0.371654	0.408941	0.445961
'cub'	1	0.209	0.2347	0.297				0.0399872			2	0.209	0.2323	0.2957				0.0388081			3	0.2142	0.2362	0.2954				0.0386419			4	0.21	0.2385	0.2983				0.0371777			5	0.201	0.2281	0.2856				0.0372865
'cub'	1	0.2108	0.2437	0.319							2	0.2103	0.2413	0.3188							3	0.2155	0.2444	0.3167							4	0.2129	0.2468	0.319							5	0.2031	0.236	0.3057
'cub'	1	0.2153	0.2512	0.338		Top1 Acc.	SGD	AT_Only	ALL		2	0.2118	0.252	0.34		Top1 Acc.	SGD	AT_Only	ALL		3	0.2183	0.254	0.3394		Top1 Acc.	SGD	AT_Only	ALL		4	0.2158	0.2556	0.3398		Top1 Acc.	SGD	AT_Only	ALL		5	0.2053	0.244	0.3247		Top1 Acc.	SGD	AT_Only	ALL
'cub'	1	0.2181	0.2634	0.3608		'cub'	0.4666	0.4807	0.486		2	0.214	0.2637	0.3591		'cub'	0.4734	0.4917	0.4954		3	0.2213	0.2622	0.3564		'cub'	0.4639	0.4822	0.4846		4	0.2181	0.2664	0.3555		'cub'	0.4617	0.4758	0.4763		5	0.2073	0.2537	0.3435		'cub'	0.4644	0.4756	0.4788
'cub'	1	0.2216	0.2732	0.381		'flower'	0.6523	0.6875	0.6963		2	0.2158	0.2744	0.3801		'flower'	0.649	0.676	0.6836		3	0.2234	0.271	0.3718		'flower'	0.672	0.698	0.705		4	0.2202	0.275	0.3745		'flower'	0.66	0.6846	0.695		5	0.2092	0.2627	0.3623		'flower'	0.677	0.6987	0.703
'cub'	1	0.2415	0.3694	0.456		'mini'	0.591	0.5957	0.601		2	0.2418	0.3694	0.4634		'mini'	0.5894	0.592	0.5947		3	0.2444	0.3665	0.4512		'mini'	0.5864	0.5815	0.585		4	0.2473	0.3677	0.4478		'mini'	0.586	0.5815	0.586		5	0.2338	0.352	0.4453		'mini'	0.5693	0.567	0.5664
'cub'	1	0.2712	0.4229	0.4717		'traffic'	0.678	0.7036	0.7095		2	0.2656	0.4272	0.4841		'traffic'	0.6875	0.715	0.72		3	0.266	0.4214	0.4714		'traffic'	0.6743	0.702	0.705		4	0.2737	0.4187	0.4631		'traffic'	0.6685	0.703	0.706		5	0.2559	0.4119	0.4656		'traffic'	0.678	0.7075	0.709
'cub'	1	0.293	0.448	0.4785		Average	0.596975	0.616875	0.6232		2	0.2852	0.454	0.4895		Average	0.599825	0.618675	0.623425		3	0.2883	0.446	0.48		Average	0.59915	0.615925	0.6199		4	0.2915	0.443	0.472		Average	0.59405	0.611225	0.615825		5	0.275	0.4387	0.4724		Average	0.597175	0.6122	0.6143
'cub'	1	0.308	0.4604	0.4817				0.0199			2	0.303	0.4695	0.4922				0.01885			3	0.3054	0.4565	0.481				0.016775			4	0.3125	0.4556	0.4734				0.017175			5	0.2917	0.453	0.474				0.015025
'cub'	1	0.3203	0.4688	0.4817							2	0.3193	0.4795	0.4922							3	0.3188	0.4631	0.4844							4	0.327	0.4634	0.4763							5	0.3035	0.4592	0.474
'cub'	1	0.3318	0.4727	0.483		Top-N%	SGD	AT_Only	ALL		2	0.3303	0.4817	0.4915		Top-N%	SGD	AT_Only	ALL		3	0.3303	0.4692	0.483		Top-N%	SGD	AT_Only	ALL		4	0.3362	0.4656	0.4753		Top-N%	SGD	AT_Only	ALL		5	0.3154	0.4634	0.4766		Top-N%	SGD	AT_Only	ALL
'cub'	1	0.338	0.476	0.4844		'cub'	0.420787	0.471573	0.4804		2	0.3416	0.4893	0.493		'cub'	0.42404	0.47908	0.48658		3	0.3398	0.474	0.4844		'cub'	0.418107	0.468887	0.477887		4	0.3455	0.4673	0.4749		'cub'	0.418267	0.46276	0.468406		5	0.3254	0.4673	0.4778		'cub'	0.414667	0.46672	0.47524
'cub'	1	0.3462	0.4753	0.4858		'flower'	0.592153	0.672087	0.687887		2	0.3489	0.4912	0.4937		'flower'	0.582633	0.659867	0.676693		3	0.3462	0.4768	0.4844		'flower'	0.605527	0.68112	0.6998		4	0.3518	0.4668	0.4731		'flower'	0.591527	0.667427	0.682467		5	0.3347	0.4707	0.4746		'flower'	0.61286	0.68374	0.69608
'cub'	1	0.354	0.4758	0.486		'mini'	0.506927	0.573793	0.58378		2	0.3562	0.4917	0.4954		'mini'	0.514093	0.57172	0.578813		3	0.3547	0.4814	0.4846		'mini'	0.505767	0.563733	0.571287		4	0.3582	0.4663	0.4724		'mini'	0.505467	0.562993	0.57108		5	0.3398	0.4712	0.4753		'mini'	0.490947	0.547167	0.552013
'cub'	1	0.3877	0.4807	0.477		'traffic'	0.61504	0.678647	0.691247		2	0.385	0.487	0.4805		'traffic'	0.631273	0.69416	0.704387		3	0.385	0.4822	0.4763		'traffic'	0.61764	0.679627	0.692173		4	0.3938	0.4758	0.4675		'traffic'	0.610007	0.674013	0.688473		5	0.3728	0.4756	0.4753		'traffic'	0.6213	0.677287	0.693133
'cub'	1	0.4023	0.477	0.4805		Average	0.533727	0.599025	0.610828		2	0.407	0.483	0.4832		Average	0.53801	0.601207	0.611618		3	0.406	0.4766	0.4746		Average	0.53676	0.598342	0.610287		4	0.4065	0.4688	0.469		Average	0.531317	0.591798	0.602607		5	0.3909	0.4697	0.4727		Average	0.534943	0.593728	0.604117
'cub'	1	0.417	0.4714	0.4775				0.0652983			2	0.4185	0.482	0.483				0.0631967			3	0.4158	0.474	0.4692				0.0615817			4	0.4172	0.4705	0.4653				0.0604817			5	0.4033	0.4734	0.468				0.058785
'cub'	1	0.4268	0.469	0.478							2	0.4333	0.4817	0.4834							3	0.4275	0.4675	0.4753							4	0.4287	0.4702	0.4648							5	0.418	0.4673	0.4746
'cub'	1	0.439	0.4753	0.4785		15					2	0.4478	0.4824	0.4792							3	0.4377	0.4668	0.4758							4	0.44	0.4614	0.463							5	0.4346	0.4648	0.4785
'cub'	1	0.4526	0.47	0.4807		'cub'	0.3462	0.4604	0.4722		2	0.4575	0.473	0.48		'cub'	0.3489	0.4578	0.4778		3	0.4475	0.4653	0.469		'cub'	0.3462	0.4526	0.469		4	0.4512	0.4575	0.4636		'cub'	0.3518	0.4475	0.4604		5	0.4436	0.464	0.4724		'cub'	0.3347	0.453	0.4724
'cub'	1	0.4592	0.4707	0.4805		'flower'	0.486	0.6577	0.674		2	0.4675	0.473	0.4778		'flower'	0.4712	0.6475	0.663		3	0.4558	0.4634	0.4658		'flower'	0.4883	0.667	0.688		4	0.4548	0.4526	0.4604		'flower'	0.4788	0.6543	0.668		5	0.4536	0.4656	0.4766		'flower'	0.5034	0.6714	0.681
'cub'	1	0.4666	0.4685	0.4666		'mini'	0.3784	0.5483	0.564		2	0.472	0.4634	0.476		'mini'	0.3972	0.5366	0.5503		3	0.4602	0.4639	0.4749		'mini'	0.3818	0.534	0.543		4	0.4612	0.4521	0.4602		'mini'	0.3796	0.5273	0.5435		5	0.4583	0.4673	0.4788		'mini'	0.3677	0.5137	0.5254
'cub'	1	0.4663	0.462	0.4722		'traffic'	0.519	0.647	0.6504		2	0.4734	0.4578	0.47		'traffic'	0.533	0.661	0.6665		3	0.4639	0.4526	0.4644		'traffic'	0.523	0.6533	0.6626		4	0.4617	0.4475	0.4604		'traffic'	0.511	0.6333	0.6455		5	0.4644	0.4683	0.475		'traffic'	0.5283	0.6514	0.659
'cub'	1	0.4614	0.4387	0.443		Average	0.4324	0.57835	0.59015		2	0.4634	0.4272	0.4253		Average	0.437575	0.575725	0.5894		3	0.457	0.4182	0.4346		Average	0.434825	0.576725	0.59065		4	0.45	0.4102	0.428		Average	0.4303	0.5656	0.57935		5	0.4602	0.423	0.4424		Average	0.433525	0.572375	0.58445
'cub'	1	0.4485	0.2057	0.2566							2	0.453	0.2104	0.2766							3	0.4355	0.2134	0.2678							4	0.4338	0.2068	0.2612							5	0.444	0.2113	0.2656
'cub'	1	0.4265	0.2008	0.2411							2	0.4255	0.1997	0.2418							3	0.4128	0.2042	0.2212							4	0.4087	0.2014	0.2286							5	0.4248	0.2006	0.2422
'cub'	1	0.3577	0.2023	0.2147							2	0.3516	0.2023	0.2108							3	0.366	0.1969	0.217							4	0.3564	0.201	0.213							5	0.377	0.2	0.2075
'cub'	1	0.2551	0.1986	0.2113							2	0.2563	0.1964	0.1982							3	0.266	0.2035	0.21							4	0.2654	0.1968	0.2092							5	0.256	0.1978	0.2123
'cub'	1	0.206	0.2003	0.2062							2	0.2078	0.197	0.2078							3	0.2058	0.1985	0.211							4	0.2113	0.2023	0.2001							5	0.2084	0.1969	0.2019
'cub'	1	0.1982	0.2001	0.1978							2	0.2087	0.2013	0.2037							3	0.1989	0.202	0.2039							4	0.2029	0.1993	0.2035							5	0.2009	0.2042	0.2079
'cub'	1	0.2025	0.2009	0.2046							2	0.2012	0.1975	0.2007							3	0.2025	0.2006	0.2035							4	0.2012	0.1996	0.2008							5	0.2021	0.1974	0.2006
'cub'	1	0.1992	0.1985	0.2063							2	0.2003	0.2019	0.2034							3	0.2025	0.2	0.2056							4	0.1997	0.1997	0.2031							5	0.2021	0.1951	0.2013
'flower'	1	0.2014	0.2054	0.2144							2	0.1984	0.2025	0.2128							3	0.2025	0.2078	0.2139							4	0.2091	0.2119	0.2207							5	0.2057	0.2097	0.2207
'flower'	1	0.2043	0.2155	0.2366							2	0.2025	0.2137	0.2341							3	0.2057	0.2148	0.2365							4	0.2106	0.2216	0.2451							5	0.2091	0.2224	0.2456
'flower'	1	0.2083	0.2256	0.269							2	0.2062	0.2242	0.263							3	0.2092	0.2251	0.272							4	0.2148	0.233	0.2712							5	0.2134	0.2346	0.2822
'flower'	1	0.2113	0.2368	0.306							2	0.2107	0.2347	0.2998							3	0.2118	0.2382	0.3098							4	0.2184	0.2466	0.31							5	0.2186	0.2482	0.325
'flower'	1	0.2156	0.2527	0.349							2	0.2136	0.2487	0.338							3	0.2164	0.2522	0.3555							4	0.2231	0.2578	0.3494							5	0.2231	0.2637	0.3691
'flower'	1	0.2201	0.2698	0.3926							2	0.2184	0.264	0.3833							3	0.2202	0.2693	0.3994							4	0.2267	0.27	0.3877							5	0.2291	0.2805	0.4187
'flower'	1	0.2239	0.2886	0.4355							2	0.223	0.279	0.4265							3	0.2246	0.29	0.4478							4	0.2325	0.2878	0.4329							5	0.2355	0.3035	0.4607
'flower'	1	0.2296	0.307	0.4763							2	0.2281	0.297	0.4644							3	0.2301	0.308	0.4856							4	0.236	0.306	0.4692							5	0.2386	0.322	0.497
'flower'	1	0.2335	0.3242	0.5117							2	0.231	0.316	0.4944							3	0.2335	0.3286	0.5195							4	0.2407	0.3271	0.5034							5	0.2433	0.3416	0.525
'flower'	1	0.2394	0.3442	0.54							2	0.2343	0.3347	0.5195							3	0.2395	0.352	0.5483							4	0.2454	0.345	0.5273							5	0.2483	0.363	0.551
'flower'	1	0.2942	0.5273	0.655							2	0.2852	0.51	0.64							3	0.2922	0.5366	0.6646							4	0.2922	0.515	0.649							5	0.3013	0.5464	0.669
'flower'	1	0.346	0.6084	0.6787							2	0.3325	0.588	0.663							3	0.3494	0.622	0.69							4	0.339	0.5996	0.675							5	0.3518	0.6274	0.6914
'flower'	1	0.384	0.6455	0.687							2	0.373	0.626	0.6733							3	0.3933	0.6523	0.698							4	0.3762	0.6396	0.6836							5	0.397	0.6626	0.694
'flower'	1	0.4177	0.6655	0.69							2	0.4006	0.6475	0.68							3	0.4258	0.6694	0.7026							4	0.41	0.6587	0.6846							5	0.429	0.6763	0.6987
'flower'	1	0.4412	0.674	0.693							2	0.4236	0.6577	0.6836							3	0.4502	0.6826	0.702							4	0.4355	0.6694	0.6875							5	0.4563	0.6865	0.6987
'flower'	1	0.4607	0.68	0.695							2	0.4448	0.664	0.683							3	0.4683	0.69	0.705							4	0.4539	0.6797	0.69							5	0.476	0.6904	0.7
'flower'	1	0.4749	0.6826	0.6963							2	0.461	0.669	0.6826							3	0.4836	0.695	0.7036							4	0.4678	0.682	0.693							5	0.4907	0.695	0.7026
'flower'	1	0.486	0.686	0.695							2	0.4712	0.672	0.683							3	0.496	0.6973	0.7036							4	0.4788	0.683	0.6914							5	0.5044	0.6963	0.7017
'flower'	1	0.4983	0.6875	0.696							2	0.4807	0.676	0.682							3	0.5093	0.698	0.702							4	0.4893	0.6846	0.695							5	0.5156	0.6987	0.7026
'flower'	1	0.5547	0.6855	0.67							2	0.5386	0.6753	0.661							3	0.5684	0.6924	0.681							4	0.5435	0.682	0.668							5	0.572	0.696	0.68
'flower'	1	0.5806	0.673	0.6685							2	0.563	0.6577	0.656							3	0.5957	0.677	0.6816							4	0.57	0.67	0.6665							5	0.6006	0.6855	0.6753
'flower'	1	0.599	0.669	0.674							2	0.585	0.6562	0.665							3	0.614	0.667	0.688							4	0.5903	0.661	0.667							5	0.62	0.677	0.681
'flower'	1	0.6177	0.67	0.676							2	0.606	0.654	0.666							3	0.632	0.6694	0.693							4	0.612	0.6543	0.67							5	0.639	0.6724	0.686
'flower'	1	0.632	0.6577	0.6865							2	0.6226	0.645	0.677							3	0.6465	0.676	0.6963							4	0.6274	0.6562	0.6733							5	0.655	0.669	0.6895
'flower'	1	0.6406	0.6665	0.678							2	0.6377	0.652	0.6787							3	0.6577	0.6743	0.7046							4	0.6455	0.648	0.676							5	0.6655	0.6763	0.697
'flower'	1	0.6475	0.6523	0.688							2	0.6426	0.6562	0.6753							3	0.665	0.6777	0.6997							4	0.65	0.6543	0.6846							5	0.672	0.6714	0.703
'flower'	1	0.6504	0.663	0.6895							2	0.648	0.6543	0.6807							3	0.669	0.6787	0.704							4	0.657	0.66	0.689							5	0.6743	0.684	0.699
'flower'	1	0.6523	0.658	0.6953							2	0.649	0.6577	0.6772							3	0.672	0.666	0.7046							4	0.66	0.66	0.676							5	0.677	0.6763	0.696
'flower'	1	0.6274	0.663	0.667							2	0.632	0.6484	0.6436							3	0.645	0.672	0.661							4	0.6367	0.6562	0.6675							5	0.6494	0.674	0.668
'flower'	1	0.6143	0.2195	0.3079							2	0.607	0.2214	0.3452							3	0.621	0.2144	0.3691							4	0.618	0.2222	0.3574							5	0.6304	0.2375	0.3972
'flower'	1	0.581	0.1997	0.2803							2	0.5703	0.2017	0.3013							3	0.603	0.2029	0.2861							4	0.5874	0.196	0.3054							5	0.6143	0.2042	0.3142
'flower'	1	0.5005	0.1991	0.248							2	0.4858	0.1948	0.2317							3	0.4883	0.206	0.2352							4	0.507	0.1975	0.2375							5	0.5034	0.1967	0.2328
'flower'	1	0.2954	0.2031	0.2078							2	0.3176	0.2042	0.2257							3	0.2834	0.1975	0.2155							4	0.295	0.2035	0.2115							5	0.3247	0.1959	0.2246
'flower'	1	0.2142	0.1995	0.222							2	0.2141	0.2013	0.2206							3	0.2078	0.1953	0.2163							4	0.2142	0.2024	0.2245							5	0.2491	0.1996	0.2172
'flower'	1	0.2051	0.1985	0.2163							2	0.2108	0.1954	0.2032							3	0.2043	0.199	0.2109							4	0.2069	0.2036	0.1971							5	0.2136	0.2029	0.223
'flower'	1	0.2075	0.1996	0.2012							2	0.2094	0.196	0.2021							3	0.2018	0.1979	0.2167							4	0.2006	0.2026	0.2119							5	0.2072	0.1996	0.2037
'flower'	1	0.2086	0.2018	0.2164							2	0.2006	0.1996	0.2091							3	0.2024	0.2017	0.2112							4	0.2019	0.2009	0.2							5	0.2024	0.2036	0.2185
'mini'	1	0.1975	0.1992	0.2032							2	0.2056	0.2068	0.2098							3	0.2024	0.2048	0.208							4	0.2152	0.2162	0.2198							5	0.1957	0.197	0.2004
'mini'	1	0.1985	0.2037	0.2115							2	0.2064	0.21	0.2217							3	0.2032	0.2084	0.2162							4	0.216	0.2201	0.2299							5	0.1969	0.2003	0.2069
'mini'	1	0.2	0.2075	0.2266							2	0.2076	0.2163	0.2378							3	0.2051	0.2112	0.231							4	0.2174	0.2242	0.2418							5	0.1985	0.2047	0.2217
'mini'	1	0.2013	0.2119	0.251							2	0.2086	0.2214	0.2615							3	0.2064	0.217	0.254							4	0.2185	0.2301	0.2603							5	0.2	0.2069	0.2451
'mini'	1	0.2032	0.2179	0.2837							2	0.211	0.2283	0.294							3	0.209	0.2229	0.285							4	0.2201	0.2345	0.2852							5	0.2021	0.2142	0.2756
'mini'	1	0.2053	0.2266	0.3235							2	0.2129	0.2368	0.3337							3	0.2101	0.2296	0.3198							4	0.2212	0.2399	0.319							5	0.2034	0.2223	0.3096
'mini'	1	0.2067	0.2357	0.3623							2	0.215	0.2472	0.369							3	0.2114	0.2389	0.3567							4	0.2234	0.2485	0.355							5	0.2048	0.2316	0.3523
'mini'	1	0.2083	0.2461	0.3987							2	0.2173	0.2595	0.4036							3	0.2128	0.2517	0.3914							4	0.2252	0.257	0.3882							5	0.2068	0.2411	0.3875
'mini'	1	0.2097	0.261	0.4316							2	0.2192	0.27	0.434							3	0.2155	0.2622	0.4197							4	0.2275	0.2693	0.4202							5	0.2086	0.2527	0.4185
'mini'	1	0.2125	0.274	0.4563							2	0.2217	0.2856	0.4568							3	0.2172	0.2766	0.4468							4	0.2285	0.2812	0.45							5	0.2101	0.2646	0.4436
'mini'	1	0.2374	0.4272	0.567							2	0.2505	0.438	0.5645							3	0.2401	0.4243	0.551							4	0.2515	0.42	0.5557							5	0.2339	0.413	0.5386
'mini'	1	0.2688	0.5083	0.5874							2	0.2815	0.5186	0.5884							3	0.271	0.5034	0.576							4	0.28	0.5093	0.577							5	0.2632	0.4978	0.5576
'mini'	1	0.2998	0.5483	0.5947							2	0.3152	0.5513	0.594							3	0.3	0.539	0.582							4	0.3071	0.5444	0.5835							5	0.2888	0.5264	0.5615
'mini'	1	0.3252	0.569	0.5986							2	0.3445	0.5693	0.593							3	0.3286	0.56	0.585							4	0.333	0.5596	0.5854							5	0.3154	0.542	0.5635
'mini'	1	0.3496	0.581	0.5977							2	0.366	0.578	0.593							3	0.35	0.5693	0.5825							4	0.351	0.57	0.583							5	0.338	0.551	0.565
'mini'	1	0.3665	0.5884	0.5996							2	0.3838	0.584	0.5933							3	0.3667	0.5757	0.584							4	0.3647	0.576	0.586							5	0.3545	0.557	0.5664
'mini'	1	0.3784	0.59	0.601							2	0.3972	0.589	0.5947							3	0.3818	0.5786	0.582							4	0.3796	0.576	0.5845							5	0.3677	0.565	0.565
'mini'	1	0.3909	0.594	0.598							2	0.407	0.59	0.593							3	0.394	0.578	0.579							4	0.3918	0.5815	0.5845							5	0.3792	0.5654	0.564
'mini'	1	0.4028	0.5957	0.597							2	0.4182	0.592	0.5903							3	0.4033	0.5815	0.5757							4	0.401	0.5815	0.5815							5	0.388	0.567	0.5615
'mini'	1	0.4539	0.5894	0.5728							2	0.4758	0.589	0.5703							3	0.4583	0.581	0.5684							4	0.46	0.5796	0.5713							5	0.442	0.5586	0.5444
'mini'	1	0.491	0.5747	0.5728							2	0.5063	0.5767	0.567							3	0.488	0.5664	0.5723							4	0.4893	0.574	0.5703							5	0.473	0.5527	0.5483
'mini'	1	0.519	0.572	0.5684							2	0.5283	0.575	0.5674							3	0.5156	0.5645	0.5674							4	0.5137	0.567	0.557							5	0.5005	0.5474	0.537
'mini'	1	0.5425	0.5674	0.5713							2	0.547	0.579	0.561							3	0.539	0.5635	0.563							4	0.5396	0.5586	0.5527							5	0.5244	0.5483	0.543
'mini'	1	0.5615	0.569	0.5664							2	0.563	0.559	0.562							3	0.559	0.5576	0.558							4	0.5576	0.553	0.5503							5	0.544	0.55	0.539
'mini'	1	0.576	0.558	0.564							2	0.5747	0.5566	0.5503							3	0.573	0.5605	0.543							4	0.5684	0.55	0.5435							5	0.556	0.5376	0.5205
'mini'	1	0.5835	0.555	0.5586							2	0.583	0.5503	0.55							3	0.5815	0.5464	0.541							4	0.5767	0.5464	0.5376							5	0.5635	0.5254	0.5254
'mini'	1	0.589	0.555	0.5503							2	0.5874	0.5366	0.5415							3	0.5864	0.534	0.5303							4	0.5835	0.5273	0.532							5	0.567	0.5137	0.516
'mini'	1	0.591	0.5454	0.534							2	0.5894	0.531	0.5273							3	0.583	0.521	0.5215							4	0.586	0.527	0.521							5	0.5693	0.51	0.5127
'mini'	1	0.563	0.4292	0.444							2	0.5684	0.4246	0.438							3	0.56	0.4348	0.441							4	0.56	0.4348	0.437							5	0.547	0.4302	0.4153
'mini'	1	0.5254	0.2052	0.2651							2	0.524	0.208	0.2507							3	0.5234	0.2058	0.2437							4	0.5205	0.2037	0.26							5	0.5083	0.2013	0.2654
'mini'	1	0.436	0.1984	0.2324							2	0.4417	0.2013	0.24							3	0.4402	0.2006	0.2346							4	0.4543	0.2046	0.2323							5	0.4343	0.202	0.2367
'mini'	1	0.3655	0.1996	0.2118							2	0.3623	0.201	0.2168							3	0.3271	0.2025	0.2103							4	0.359	0.1984	0.2196							5	0.339	0.2009	0.2147
'mini'	1	0.2379	0.2054	0.2072							2	0.2346	0.1997	0.2035							3	0.2245	0.2054	0.2085							4	0.23	0.2047	0.2084							5	0.2275	0.201	0.2086
'mini'	1	0.1991	0.1986	0.2094							2	0.1997	0.1995	0.2042							3	0.2047	0.2009	0.2141							4	0.1951	0.2006	0.1969							5	0.2012	0.1968	0.2046
'mini'	1	0.1997	0.2026	0.2047							2	0.2009	0.1968	0.204							3	0.1996	0.1997	0.2025							4	0.2013	0.2021	0.2052							5	0.2001	0.1998	0.2039
'mini'	1	0.202	0.2006	0.2021							2	0.1989	0.2001	0.1985							3	0.2018	0.2025	0.2017							4	0.2023	0.1982	0.2003							5	0.1984	0.2001	0.1986
'mini'	1	0.1998	0.1979	0.2008							2	0.2	0.202	0.1993							3	0.1985	0.1968	0.2058							4	0.1978	0.1989	0.2057							5	0.1991	0.2012	0.2032
'traffic'	1	0.2098	0.2164	0.2269							2	0.2001	0.2057	0.2156							3	0.204	0.2103	0.2197							4	0.2017	0.2067	0.2174							5	0.2031	0.209	0.2211
'traffic'	1	0.2148	0.2279	0.2537							2	0.2041	0.2158	0.2476							3	0.2081	0.221	0.2499							4	0.2046	0.2185	0.246							5	0.2079	0.2211	0.249
'traffic'	1	0.2195	0.2415	0.2913							2	0.2091	0.2329	0.29							3	0.2153	0.2355	0.288							4	0.2103	0.2325	0.2798							5	0.2129	0.2347	0.2822
'traffic'	1	0.2256	0.257	0.3333							2	0.2119	0.2491	0.3313							3	0.22	0.2524	0.3374							4	0.2167	0.2482	0.3215							5	0.219	0.251	0.3264
'traffic'	1	0.2317	0.2734	0.3723							2	0.219	0.269	0.3784							3	0.2256	0.2734	0.3777							4	0.2223	0.2668	0.36							5	0.2236	0.268	0.3716
'traffic'	1	0.2369	0.2944	0.417							2	0.226	0.2913	0.4243							3	0.232	0.2925	0.4153							4	0.2275	0.2825	0.4038							5	0.2295	0.2842	0.4165
'traffic'	1	0.2429	0.3147	0.4553							2	0.2341	0.3113	0.4626							3	0.238	0.3145	0.456							4	0.2352	0.3015	0.4421							5	0.2354	0.3074	0.4565
'traffic'	1	0.25	0.337	0.492							2	0.2408	0.335	0.4954							3	0.2434	0.3398	0.4893							4	0.2396	0.3223	0.4846							5	0.2424	0.3262	0.4885
'traffic'	1	0.2556	0.3542	0.526							2	0.249	0.3567	0.524							3	0.25	0.3582	0.517							4	0.2451	0.3438	0.5137							5	0.2485	0.3489	0.518
'traffic'	1	0.2617	0.3762	0.547							2	0.2563	0.38	0.5493							3	0.2573	0.3806	0.5425							4	0.2505	0.365	0.5386							5	0.255	0.3762	0.542
'traffic'	1	0.338	0.546	0.65							2	0.331	0.5537	0.661							3	0.335	0.5444	0.6543							4	0.3164	0.5366	0.6455							5	0.3271	0.545	0.6426
'traffic'	1	0.3972	0.616	0.6816							2	0.3962	0.63	0.685							3	0.3928	0.615	0.6797							4	0.3787	0.6074	0.6704							5	0.3955	0.608	0.67
'traffic'	1	0.4424	0.648	0.693							2	0.4473	0.661	0.696							3	0.443	0.647	0.6885							4	0.4282	0.6396	0.6855							5	0.4475	0.639	0.682
'traffic'	1	0.476	0.664	0.699							2	0.486	0.6772	0.7056							3	0.4814	0.664	0.694							4	0.4653	0.657	0.6895							5	0.48	0.6567	0.69
'traffic'	1	0.501	0.6743	0.702							2	0.5127	0.685	0.7104							3	0.506	0.6743	0.698							4	0.491	0.667	0.6963							5	0.509	0.666	0.696
'traffic'	1	0.519	0.683	0.7046							2	0.533	0.692	0.7134							3	0.523	0.68	0.6997							4	0.511	0.676	0.6997							5	0.5283	0.6743	0.699
'traffic'	1	0.5356	0.686	0.7046							2	0.5522	0.6978	0.716							3	0.541	0.6826	0.701							4	0.5264	0.6807	0.702							5	0.5435	0.6787	0.702
'traffic'	1	0.546	0.689	0.7065							2	0.5645	0.701	0.7188							3	0.552	0.6855	0.7036							4	0.5405	0.684	0.703							5	0.553	0.685	0.7046
'traffic'	1	0.5557	0.692	0.7095							2	0.572	0.707	0.72							3	0.5605	0.6904	0.705							4	0.5522	0.688	0.706							5	0.5645	0.688	0.7065
'traffic'	1	0.605	0.7036	0.702							2	0.626	0.715	0.7134							3	0.607	0.702	0.6978							4	0.602	0.703	0.7017							5	0.613	0.7075	0.7
'traffic'	1	0.6274	0.6973	0.701							2	0.648	0.712	0.7163							3	0.6304	0.699	0.6987							4	0.6255	0.6987	0.7026							5	0.6387	0.6987	0.705
'traffic'	1	0.644	0.695	0.698							2	0.6655	0.706	0.7144							3	0.643	0.6943	0.705							4	0.644	0.694	0.703							5	0.6533	0.689	0.709
'traffic'	1	0.653	0.6875	0.6895							2	0.6772	0.7104	0.71							3	0.6567	0.692	0.6895							4	0.6543	0.689	0.6885							5	0.6626	0.693	0.7065
'traffic'	1	0.6646	0.681	0.669							2	0.682	0.6987	0.699							3	0.6655	0.6777	0.6885							4	0.6577	0.683	0.6714							5	0.669	0.681	0.6924
'traffic'	1	0.67	0.67	0.658							2	0.6855	0.6943	0.681							3	0.673	0.6743	0.671							4	0.663	0.6675	0.662							5	0.6753	0.678	0.675
'traffic'	1	0.6753	0.662	0.6504							2	0.687	0.679	0.6665							3	0.6733	0.667	0.6626							4	0.6655	0.6494	0.6416							5	0.6772	0.6597	0.659
'traffic'	1	0.676	0.647	0.6396							2	0.6875	0.676	0.649							3	0.6743	0.658	0.648							4	0.6655	0.633	0.6304							5	0.678	0.6523	0.641
'traffic'	1	0.678	0.628	0.62							2	0.687	0.6553	0.6396							3	0.673	0.6533	0.641							4	0.6685	0.6333	0.6206							5	0.678	0.6514	0.642
'traffic'	1	0.639	0.5366	0.5166							2	0.6587	0.5605	0.536							3	0.6416	0.554	0.528							4	0.628	0.531	0.5024							5	0.6426	0.549	0.5225
'traffic'	1	0.537	0.2185	0.238							2	0.543	0.216	0.2411							3	0.5503	0.209	0.2444							4	0.546	0.213	0.2434							5	0.5425	0.2155	0.2411
'traffic'	1	0.4507	0.196	0.2399							2	0.4763	0.1978	0.2417							3	0.4678	0.199	0.2366							4	0.4604	0.1997	0.2352							5	0.466	0.1998	0.2299
'traffic'	1	0.3352	0.1989	0.2085							2	0.3428	0.1974	0.2144							3	0.3503	0.2013	0.2029							4	0.347	0.1993	0.2064							5	0.3508	0.2003	0.2234
'traffic'	1	0.2151	0.1981	0.2048							2	0.232	0.2026	0.2075							3	0.224	0.2023	0.2023							4	0.2227	0.2014	0.2073							5	0.2255	0.1965	0.2065
'traffic'	1	0.2023	0.2014	0.2028							2	0.2072	0.1996	0.2052							3	0.2018	0.2013	0.2053							4	0.2024	0.2001	0.2109							5	0.1985	0.2019	0.2035
'traffic'	1	0.2012	0.2031	0.201							2	0.2017	0.1991	0.1975							3	0.1996	0.2021	0.2053							4	0.2029	0.2019	0.2075							5	0.2069	0.2042	0.209
'traffic'	1	0.2034	0.2007	0.2051							2	0.1995	0.205	0.2054							3	0.199	0.1991	0.2							4	0.1962	0.2021	0.2075							5	0.1997	0.2073	0.2026
'traffic'	1	0.1982	0.2054	0.2079							2	0.2023	0.2013	0.2039							3	0.2004	0.1989	0.2023							4	0.2021	0.2064	0.2036							5	0.2008	0.1981	0.2056
