# Supplementary material
Source: ML conference proceedings conference paper supplement (https://openreview.net/forum?id=qkLMTphG5-h)
Supplement: supplementary_material [file 10way_1shot_SGD_AT_Only_ALL.xlsx]

## Sheet: 10way_1shot_SGD_AT_Only_ALL
		SGD	AT_Only	ALL		average	SGD	AT_Only	ALL			SGD	AT_Only	ALL		average	SGD	AT_Only	ALL			SGD	AT_Only	ALL		average	SGD	AT_Only	ALL			SGD	AT_Only	ALL		average	SGD	AT_Only	ALL			SGD	AT_Only	ALL		average	SGD	AT_Only	ALL
'cub'	1	0.1025	0.1044	0.1066		'cub'	0.174264	0.169801	0.176856		2	0.09973	0.1014	0.1055		'cub'	0.175365	0.171676	0.179614		3	0.0991	0.1014	0.1037		'cub'	0.172892	0.169746	0.177645		4	0.09827	0.1005	0.1041		'cub'	0.179308	0.172748	0.180732		5	0.10187	0.1032	0.106		'cub'	0.174755	0.170642	0.177188
'cub'	1	0.1045	0.1086	0.11676		'flower'	0.275286	0.271031	0.287509		2	0.10144	0.107	0.1141		'flower'	0.265813	0.262262	0.277407		3	0.10114	0.10504	0.1124		'flower'	0.264546	0.261121	0.277153		4	0.10095	0.1054	0.11255		'flower'	0.263462	0.261478	0.276635		5	0.104	0.10724	0.1138		'flower'	0.265836	0.263207	0.279861
'cub'	1	0.10706	0.11395	0.1259		'mini'	0.215278	0.211228	0.221665		2	0.1041	0.1117	0.12256		'mini'	0.213216	0.210287	0.22047		3	0.1028	0.10986	0.12177		'mini'	0.214649	0.210513	0.222233		4	0.1035	0.1105	0.12366		'mini'	0.213984	0.211973	0.223533		5	0.1056	0.11255	0.1235		'mini'	0.215091	0.211726	0.223236
'cub'	1	0.10956	0.12115	0.1345		'traffic'	0.239057	0.240479	0.249809		2	0.10626	0.1172	0.1326		'traffic'	0.236544	0.239237	0.248346		3	0.10394	0.1154	0.1327		'traffic'	0.240889	0.242133	0.250575		4	0.1052	0.1173	0.1354		'traffic'	0.237769	0.240028	0.248405		5	0.1081	0.11865	0.135		'traffic'	0.235611	0.237524	0.246386
'cub'	1	0.1113	0.1257	0.1442		Average	0.225971	0.223135	0.23396		2	0.109	0.1228	0.1438		Average	0.222734	0.220865	0.231459		3	0.10693	0.1219	0.1432		Average	0.223244	0.220878	0.231901		4	0.108	0.1232	0.1448		Average	0.223631	0.221557	0.232326		5	0.1102	0.1237	0.1458		Average	0.222823	0.220775	0.231668
'cub'	1	0.1137	0.1315	0.1538				-0.00283676			2	0.11127	0.1284	0.1549				-0.00186905			3	0.10956	0.1277	0.1516				-0.00236568			4	0.1105	0.1294	0.1555				-0.00207392			5	0.11237	0.1294	0.1559				-0.00204824
'cub'	1	0.11646	0.1362	0.1632							2	0.1148	0.1351	0.1663							3	0.112	0.1333	0.1616							4	0.1131	0.1365	0.1654							5	0.11414	0.1356	0.166
'cub'	1	0.1195	0.1406	0.1722		Top1 Acc.	SGD	AT_Only	ALL		2	0.11664	0.1404	0.1736		Top1 Acc.	SGD	AT_Only	ALL		3	0.11456	0.1392	0.1716		Top1 Acc.	SGD	AT_Only	ALL		4	0.11615	0.1417	0.1746		Top1 Acc.	SGD	AT_Only	ALL		5	0.11694	0.1423	0.1735		Top1 Acc.	SGD	AT_Only	ALL
'cub'	1	0.1221	0.1475	0.1794		'cub'	0.2279	0.2292	0.2307		2	0.11896	0.1462	0.1791		'cub'	0.2335	0.2384	0.2401		3	0.1176	0.1467	0.1787		'cub'	0.2305	0.2339	0.2384		4	0.119	0.1471	0.1831		'cub'	0.2389	0.241	0.244		5	0.1191	0.1495	0.1798		'cub'	0.2301	0.233	0.2324
'cub'	1	0.125	0.1533	0.1876		'flower'	0.3967	0.418	0.4177		2	0.1216	0.1533	0.1866		'flower'	0.3838	0.4055	0.4043		3	0.11926	0.1516	0.1848		'flower'	0.3818	0.4016	0.402		4	0.12213	0.153	0.1909		'flower'	0.3787	0.4026	0.3992		5	0.1219	0.1549	0.1838		'flower'	0.3862	0.406	0.4043
'cub'	1	0.1464	0.1924	0.2145		'mini'	0.3142	0.315	0.3174		2	0.1456	0.1932	0.2158		'mini'	0.3113	0.3115	0.3147		3	0.1428	0.1909	0.214		'mini'	0.318	0.314	0.3164		4	0.1453	0.1979	0.2185		'mini'	0.3105	0.318	0.321		5	0.1466	0.1921	0.2148		'mini'	0.3137	0.3162	0.318
'cub'	1	0.1653	0.2094	0.2212		'traffic'	0.3538	0.3486	0.3545		2	0.166	0.2087	0.2228		'traffic'	0.3503	0.3447	0.3489		3	0.1611	0.2081	0.2203		'traffic'	0.3508	0.3528	0.3528		4	0.1653	0.2131	0.2252		'traffic'	0.3516	0.3447	0.349		5	0.1647	0.2085	0.2197		'traffic'	0.348	0.3462	0.3484
'cub'	1	0.1741	0.2145	0.2217		Average	0.32315	0.3277	0.330075		2	0.1757	0.2172	0.2253		Average	0.319725	0.325025	0.327		3	0.173	0.2145	0.2205		Average	0.320275	0.325575	0.3274		4	0.1769	0.2184	0.227		Average	0.319925	0.326575	0.3283		5	0.175	0.2148	0.2223		Average	0.3195	0.32535	0.325775
'cub'	1	0.1813	0.2196	0.221				0.00455			2	0.1835	0.2186	0.226				0.0053			3	0.1796	0.2172	0.2224				0.0053			4	0.1868	0.2227	0.228				0.00665			5	0.183	0.2163	0.2236				0.00585
'cub'	1	0.188	0.2192	0.2213							2	0.189	0.2217	0.226							3	0.1862	0.2179	0.2224							4	0.1915	0.223	0.2284							5	0.1874	0.2183	0.2229
'cub'	1	0.1923	0.2196	0.2225		Top-N%	SGD	AT_Only	ALL		2	0.1932	0.2217	0.2268		Top-N%	SGD	AT_Only	ALL		3	0.191	0.2186	0.2222		Top-N%	SGD	AT_Only	ALL		4	0.1952	0.2239	0.2283		Top-N%	SGD	AT_Only	ALL		5	0.1914	0.2195	0.223		Top-N%	SGD	AT_Only	ALL
'cub'	1	0.1945	0.2201	0.2225		'cub'	0.216353	0.223327	0.225647		2	0.1967	0.2229	0.2279		'cub'	0.218207	0.228713	0.232433		3	0.1942	0.2191	0.2217		'cub'	0.215193	0.225233	0.229247		4	0.1993	0.2255	0.2278		'cub'	0.22358	0.230293	0.23302		5	0.1958	0.2212	0.2224		'cub'	0.216673	0.22566	0.226973
'cub'	1	0.197	0.2197	0.2231		'flower'	0.37242	0.403907	0.4081		2	0.1987	0.2224	0.2275		'flower'	0.358107	0.389387	0.39338		3	0.1967	0.2205	0.2225		'flower'	0.3565	0.387427	0.39134		4	0.2036	0.2256	0.2275		'flower'	0.354687	0.387647	0.390073		5	0.1993	0.2211	0.2234		'flower'	0.361313	0.391953	0.39666
'cub'	1	0.1998	0.2192	0.2227		'mini'	0.291633	0.30564	0.3082		2	0.2004	0.2235	0.228		'mini'	0.285493	0.300827	0.303367		3	0.197	0.2206	0.2218		'mini'	0.290787	0.303813	0.307673		4	0.2062	0.2258	0.2279		'mini'	0.28848	0.30704	0.311967		5	0.2004	0.2225	0.224		'mini'	0.288227	0.30754	0.311087
'cub'	1	0.2098	0.222	0.2255		'traffic'	0.337513	0.34312	0.34496		2	0.207	0.2274	0.2312		'traffic'	0.335827	0.3407	0.341693		3	0.204	0.2203	0.2238		'traffic'	0.337127	0.346467	0.34576		4	0.2128	0.2277	0.229		'traffic'	0.333613	0.339427	0.33996		5	0.207	0.2261	0.227		'traffic'	0.33498	0.34004	0.340427
'cub'	1	0.2128	0.2233	0.226		Average	0.30448	0.318998	0.321727		2	0.21	0.2299	0.2332		Average	0.299408	0.314907	0.317718		3	0.2069	0.2228	0.2289		Average	0.299902	0.315735	0.318505		4	0.2166	0.2294	0.2317		Average	0.30009	0.316102	0.318755		5	0.2091	0.227	0.2299		Average	0.300298	0.316298	0.318787
'cub'	1	0.2151	0.2255	0.2307				0.0145183			2	0.2123	0.2312	0.2358				0.0154983			3	0.2103	0.2269	0.2339				0.0158333			4	0.2188	0.231	0.2346				0.0160117			5	0.2122	0.2294	0.2308				0.016
'cub'	1	0.217	0.2255	0.2305							2	0.2158	0.2305	0.237							3	0.2134	0.2294	0.2351							4	0.2218	0.2332	0.235							5	0.2174	0.2294	0.2324
'cub'	1	0.2197	0.2275	0.2306		15					2	0.2203	0.2344	0.2391							3	0.216	0.2301	0.2379							4	0.2244	0.2343	0.2378							5	0.2201	0.2285	0.232
'cub'	1	0.2249	0.2292	0.2281		'cub'	0.197	0.2192	0.2213		2	0.2236	0.2355	0.237		'cub'	0.1995	0.2186	0.226		3	0.221	0.2338	0.2384		'cub'	0.1967	0.2172	0.2217		4	0.2264	0.2352	0.2396		'cub'	0.2062	0.2227	0.2275		5	0.2225	0.233	0.232		'cub'	0.1993	0.2163	0.2224
'cub'	1	0.2256	0.227	0.2283		'flower'	0.3333	0.3826	0.3967		2	0.2278	0.2382	0.2401		'flower'	0.3196	0.3657	0.3823		3	0.2239	0.2339	0.2379		'flower'	0.3215	0.3672	0.381		4	0.2297	0.2367	0.244		'flower'	0.3206	0.368	0.3804		5	0.2251	0.2312	0.2308		'flower'	0.3237	0.3713	0.3884
'cub'	1	0.226	0.2263	0.2273		'mini'	0.2527	0.2927	0.3015		2	0.2314	0.2384	0.2363		'mini'	0.2502	0.2883	0.297		3	0.2267	0.2335	0.2358		'mini'	0.252	0.289	0.2988		4	0.2317	0.2394	0.2382		'mini'	0.2544	0.2913	0.3032		5	0.2279	0.2325	0.226		'mini'	0.2505	0.2932	0.2998
'cub'	1	0.2279	0.2262	0.2239		'traffic'	0.3147	0.3213	0.3152		2	0.2329	0.2344	0.2346		'traffic'	0.3142	0.3254	0.317		3	0.2291	0.2339	0.234		'traffic'	0.3179	0.331	0.3188		4	0.2361	0.241	0.2375		'traffic'	0.31	0.3232	0.317		5	0.2301	0.2289	0.2244		'traffic'	0.3118	0.3247	0.314
'cub'	1	0.225	0.1888	0.1754		Average	0.274425	0.30395	0.308675		2	0.2335	0.1886	0.1823		Average	0.270875	0.2995	0.305575		3	0.2305	0.1908	0.1797		Average	0.272025	0.3011	0.305075		4	0.2389	0.1957	0.1844		Average	0.2728	0.3013	0.307025		5	0.23	0.1906	0.179		Average	0.271325	0.301375	0.30615
'cub'	1	0.2217	0.1403	0.1255							2	0.2262	0.1467	0.12366							3	0.225	0.1442	0.1293							4	0.2333	0.1428	0.1337							5	0.2255	0.1423	0.1256
'cub'	1	0.2155	0.10156	0.10443							2	0.2184	0.101	0.10785							3	0.2184	0.1024	0.1068							4	0.2283	0.1056	0.10583							5	0.2157	0.1004	0.1027
'cub'	1	0.2075	0.1012	0.1083							2	0.214	0.1001	0.10516							3	0.209	0.0999	0.09985							4	0.218	0.1	0.10583							5	0.2078	0.09937	0.1011
'cub'	1	0.1952	0.1001	0.1019							2	0.1995	0.1015	0.1008							3	0.1958	0.10095	0.1022							4	0.2107	0.1007	0.09937							5	0.1956	0.1018	0.1012
'cub'	1	0.1794	0.1012	0.09894							2	0.1864	0.1003	0.09814							3	0.1857	0.09924	0.0974							4	0.2004	0.09924	0.09985							5	0.1833	0.10065	0.1015
'cub'	1	0.1655	0.10034	0.1002							2	0.1719	0.0997	0.09985							3	0.1685	0.0995	0.1024							4	0.1864	0.1005	0.0986							5	0.1752	0.1008	0.1002
'cub'	1	0.1517	0.1003	0.10205							2	0.1559	0.10065	0.0985							3	0.1573	0.1	0.09924							4	0.1727	0.09863	0.10223							5	0.1594	0.09985	0.1011
'cub'	1	0.1371	0.09973	0.1014							2	0.149	0.10016	0.1							3	0.147	0.0995	0.1004							4	0.1605	0.1001	0.10126							5	0.1442	0.10065	0.09906
'flower'	1	0.10626	0.1102	0.11584							2	0.104	0.10864	0.1141							3	0.09973	0.10474	0.1094							4	0.10156	0.10596	0.11176							5	0.10016	0.10376	0.1103
'flower'	1	0.11035	0.11884	0.1327							2	0.10834	0.11786	0.1307							3	0.10486	0.1123	0.1265							4	0.1064	0.11505	0.1299							5	0.1029	0.1128	0.1276
'flower'	1	0.11456	0.1292	0.1533							2	0.1129	0.1277	0.1525							3	0.1082	0.12244	0.1462							4	0.11035	0.1256	0.1511							5	0.10876	0.1232	0.1473
'flower'	1	0.1191	0.1396	0.1792							2	0.11774	0.1387	0.1744							3	0.11176	0.1348	0.1729							4	0.1155	0.1394	0.1752							5	0.1128	0.1342	0.175
'flower'	1	0.1233	0.152	0.2057							2	0.122	0.1528	0.1967							3	0.11615	0.1465	0.1962							4	0.1203	0.1511	0.2003							5	0.1174	0.1473	0.1979
'flower'	1	0.1284	0.1669	0.2312							2	0.1263	0.1638	0.2192							3	0.1224	0.1615	0.2216							4	0.1249	0.1641	0.2234							5	0.1217	0.163	0.2184
'flower'	1	0.1328	0.1826	0.2546							2	0.131	0.178	0.2397							3	0.1265	0.1768	0.2401							4	0.1307	0.178	0.2439							5	0.1261	0.1782	0.2399
'flower'	1	0.1377	0.1979	0.2725							2	0.1359	0.1912	0.2585							3	0.1323	0.1906	0.2573							4	0.1365	0.1941	0.2607							5	0.1316	0.1909	0.258
'flower'	1	0.1423	0.2129	0.2878							2	0.1415	0.203	0.2737							3	0.1371	0.2045	0.2754							4	0.1417	0.207	0.2764							5	0.1368	0.2037	0.2778
'flower'	1	0.148	0.2283	0.3022							2	0.148	0.2161	0.2905							3	0.1426	0.2175	0.2878							4	0.1476	0.2195	0.2905							5	0.1431	0.2162	0.293
'flower'	1	0.207	0.32	0.3738							2	0.199	0.3057	0.3542							3	0.2013	0.3044	0.3582							4	0.1993	0.303	0.357							5	0.2008	0.3086	0.36
'flower'	1	0.2502	0.3599	0.3887							2	0.2406	0.3425	0.3728							3	0.2406	0.3462	0.3726							4	0.242	0.341	0.3743							5	0.2427	0.3477	0.379
'flower'	1	0.2795	0.3743	0.3943							2	0.268	0.3584	0.379							3	0.2678	0.3596	0.381							4	0.2695	0.3591	0.3782							5	0.273	0.3645	0.3853
'flower'	1	0.2988	0.3826	0.3967							2	0.2864	0.3657	0.3823							3	0.2876	0.3672	0.3806							4	0.2874	0.368	0.3804							5	0.2896	0.3713	0.3884
'flower'	1	0.3127	0.3865	0.398							2	0.2986	0.3713	0.3838							3	0.2993	0.3706	0.381							4	0.2983	0.3738	0.3813							5	0.3042	0.3767	0.3894
'flower'	1	0.322	0.389	0.3997							2	0.3096	0.373	0.384							3	0.3086	0.3743	0.3818							4	0.3083	0.3755	0.3828							5	0.3135	0.3796	0.39
'flower'	1	0.328	0.3916	0.4001							2	0.316	0.3757	0.3855							3	0.3152	0.377	0.3828							4	0.3152	0.3774	0.3833							5	0.3193	0.3823	0.3906
'flower'	1	0.3333	0.3923	0.4001							2	0.3196	0.3782	0.3853							3	0.3215	0.378	0.384							4	0.3206	0.377	0.384							5	0.3237	0.3835	0.3916
'flower'	1	0.3381	0.3936	0.4011							2	0.3232	0.3784	0.3857							3	0.325	0.3796	0.3845							4	0.3228	0.379	0.3855							5	0.3284	0.385	0.3909
'flower'	1	0.3599	0.4033	0.409							2	0.341	0.389	0.3933							3	0.3442	0.3845	0.3914							4	0.3408	0.3857	0.391							5	0.348	0.3923	0.3962
'flower'	1	0.3674	0.4075	0.4128							2	0.3506	0.3936	0.3982							3	0.3523	0.3916	0.3987							4	0.3484	0.39	0.3955							5	0.355	0.3965	0.402
'flower'	1	0.3723	0.4114	0.4155							2	0.3555	0.3987	0.3994							3	0.3572	0.3962	0.3992							4	0.3542	0.3955	0.3965							5	0.3606	0.3992	0.404
'flower'	1	0.3767	0.4146	0.4175							2	0.3618	0.399	0.4014							3	0.361	0.3982	0.398							4	0.359	0.3955	0.3992							5	0.3677	0.401	0.4043
'flower'	1	0.3816	0.417	0.4177							2	0.3674	0.4023	0.4019							3	0.3677	0.3984	0.3972							4	0.3652	0.3977	0.3975							5	0.372	0.4006	0.403
'flower'	1	0.3875	0.4175	0.4177							2	0.374	0.4055	0.3992							3	0.3748	0.3958	0.402							4	0.368	0.3987	0.3962							5	0.3772	0.404	0.4014
'flower'	1	0.3916	0.4165	0.4148							2	0.379	0.403	0.4006							3	0.379	0.3987	0.3987							4	0.374	0.3982	0.395							5	0.3818	0.406	0.4026
'flower'	1	0.3943	0.418	0.4143							2	0.3823	0.4019	0.4043							3	0.3796	0.3997	0.3962							4	0.3765	0.4026	0.3923							5	0.384	0.4043	0.3965
'flower'	1	0.3967	0.4172	0.4065							2	0.3838	0.4055	0.3958							3	0.3818	0.4016	0.3936							4	0.3787	0.4001	0.3906							5	0.3862	0.397	0.399
'flower'	1	0.3904	0.339	0.2908							2	0.3787	0.324	0.2808							3	0.3743	0.3281	0.299							4	0.3735	0.3274	0.2786							5	0.3806	0.3298	0.297
'flower'	1	0.3787	0.2308	0.1918							2	0.367	0.226	0.1849							3	0.3572	0.2318	0.1903							4	0.3596	0.2234	0.1863							5	0.3672	0.2279	0.1952
'flower'	1	0.3662	0.10504	0.1152							2	0.352	0.1049	0.112							3	0.3435	0.10706	0.11707							4	0.3455	0.1062	0.1145							5	0.3533	0.10364	0.1136
'flower'	1	0.3516	0.1007	0.11316							2	0.3357	0.10126	0.11676							3	0.3284	0.1004	0.1184							4	0.3335	0.1008	0.12036							5	0.334	0.10156	0.11584
'flower'	1	0.3289	0.0982	0.10504							2	0.3118	0.0995	0.10565							3	0.3127	0.1	0.1055							4	0.3135	0.09906	0.1062							5	0.3157	0.09906	0.1066
'flower'	1	0.3005	0.0999	0.10376							2	0.2866	0.1001	0.1027							3	0.2888	0.1004	0.10693							4	0.2817	0.1004	0.09784							5	0.2795	0.10205	0.10095
'flower'	1	0.2637	0.10205	0.1026							2	0.256	0.10187	0.09906							3	0.267	0.1006	0.1028							4	0.2466	0.1003	0.1054							5	0.2515	0.0994	0.1012
'flower'	1	0.2339	0.1002	0.1018							2	0.2401	0.10065	0.1036							3	0.2362	0.09985	0.099							4	0.2238	0.0998	0.1005							5	0.2242	0.1014	0.10114
'flower'	1	0.2113	0.101	0.10034							2	0.2031	0.1002	0.1019							3	0.214	0.1	0.10077							4	0.2067	0.09973	0.10205							5	0.2009	0.1005	0.10394
'mini'	1	0.10455	0.10785	0.1102							2	0.109	0.1104	0.1137							3	0.10626	0.1083	0.1112							4	0.1033	0.1057	0.10974							5	0.1083	0.1102	0.1133
'mini'	1	0.108	0.11194	0.1204							2	0.111	0.1152	0.1249							3	0.10785	0.1124	0.1209							4	0.1061	0.1119	0.12164							5	0.1104	0.1147	0.1223
'mini'	1	0.1105	0.1182	0.1328							2	0.1133	0.1224	0.138							3	0.11017	0.1187	0.1315							4	0.10944	0.1182	0.1322							5	0.11285	0.12067	0.1324
'mini'	1	0.1125	0.12463	0.1467							2	0.1165	0.1296	0.1503							3	0.11316	0.1251	0.1469							4	0.1127	0.1261	0.1467							5	0.1146	0.126	0.1453
'mini'	1	0.11505	0.1332	0.1598							2	0.11926	0.1385	0.1647							3	0.1156	0.1307	0.1627							4	0.1149	0.1315	0.1604							5	0.11743	0.1327	0.1587
'mini'	1	0.1185	0.141	0.1735							2	0.12244	0.1453	0.1781							3	0.11896	0.1394	0.1776							4	0.1191	0.1398	0.1736							5	0.1201	0.1396	0.1755
'mini'	1	0.1217	0.1488	0.1874							2	0.1252	0.1523	0.1909							3	0.12115	0.1483	0.192							4	0.12195	0.1487	0.1882							5	0.123	0.147	0.1923
'mini'	1	0.1252	0.1549	0.1991							2	0.1287	0.1602	0.204							3	0.12476	0.1582	0.2043							4	0.125	0.1566	0.2015							5	0.126	0.1536	0.2051
'mini'	1	0.13	0.1641	0.2133							2	0.1322	0.1681	0.2162							3	0.1273	0.1663	0.2192							4	0.1278	0.1644	0.215							5	0.1289	0.1627	0.218
'mini'	1	0.1326	0.1709	0.226							2	0.136	0.1758	0.2275							3	0.1302	0.1738	0.2306							4	0.1309	0.172	0.2256							5	0.1321	0.1727	0.2289
'mini'	1	0.1619	0.239	0.2837							2	0.165	0.2388	0.2815							3	0.1635	0.2413	0.2827							4	0.1593	0.2388	0.2825							5	0.1598	0.239	0.283
'mini'	1	0.1862	0.2708	0.2976							2	0.189	0.27	0.294							3	0.1891	0.2715	0.2952							4	0.1864	0.2737	0.2969							5	0.1874	0.2705	0.2998
'mini'	1	0.2062	0.2866	0.3015							2	0.2101	0.2827	0.297							3	0.2091	0.2834	0.2998							4	0.21	0.2847	0.3032							5	0.2074	0.285	0.307
'mini'	1	0.2213	0.2927	0.304							2	0.2218	0.2883	0.2974							3	0.2253	0.289	0.3027							4	0.2257	0.2913	0.307							5	0.2212	0.2932	0.308
'mini'	1	0.231	0.2966	0.305							2	0.2312	0.2922	0.2974							3	0.2369	0.294	0.304							4	0.2357	0.2964	0.3076							5	0.232	0.2979	0.3093
'mini'	1	0.2415	0.3008	0.306							2	0.2379	0.292	0.2983							3	0.2445	0.2969	0.3047							4	0.2427	0.2998	0.3088							5	0.2401	0.3018	0.3093
'mini'	1	0.2483	0.3027	0.307							2	0.2449	0.2925	0.2986							3	0.2502	0.299	0.3042							4	0.2494	0.3015	0.31							5	0.2465	0.303	0.3105
'mini'	1	0.2527	0.304	0.307							2	0.2502	0.2942	0.2993							3	0.2559	0.3005	0.304							4	0.2544	0.3027	0.3105							5	0.2505	0.304	0.3115
'mini'	1	0.2563	0.3047	0.3071							2	0.2554	0.2957	0.2993							3	0.2605	0.3015	0.305							4	0.2573	0.303	0.3113							5	0.2542	0.3057	0.3127
'mini'	1	0.2764	0.308	0.3127							2	0.2712	0.3003	0.305							3	0.2769	0.3062	0.3123							4	0.2764	0.3098	0.315							5	0.274	0.3127	0.3176
'mini'	1	0.2854	0.3127	0.3174							2	0.2766	0.3042	0.3113							3	0.2834	0.3105	0.3164							4	0.2827	0.3145	0.32							5	0.2834	0.3162	0.318
'mini'	1	0.2908	0.315	0.3145							2	0.2825	0.3079	0.3147							3	0.288	0.314	0.3162							4	0.2883	0.317	0.321							5	0.289	0.3162	0.3167
'mini'	1	0.297	0.3132	0.3127							2	0.2874	0.3108	0.3118							3	0.294	0.3103	0.3157							4	0.294	0.317	0.319							5	0.2954	0.3162	0.3147
'mini'	1	0.3047	0.3113	0.3125							2	0.2935	0.3103	0.31							3	0.3	0.3113	0.3145							4	0.3003	0.318	0.3152							5	0.3005	0.313	0.3152
'mini'	1	0.3115	0.3108	0.3088							2	0.2988	0.3115	0.3052							3	0.3052	0.3093	0.3108							4	0.3037	0.3152	0.3147							5	0.3076	0.3115	0.3125
'mini'	1	0.3125	0.3103	0.305							2	0.3035	0.308	0.3047							3	0.3093	0.3093	0.306							4	0.3044	0.3115	0.3108							5	0.31	0.3127	0.3035
'mini'	1	0.314	0.3054	0.3018							2	0.3083	0.3047	0.3005							3	0.3145	0.3066	0.2988							4	0.3074	0.3057	0.3054							5	0.3127	0.306	0.2979
'mini'	1	0.3142	0.2964	0.2925							2	0.3113	0.2998	0.2886							3	0.318	0.2988	0.292							4	0.3105	0.3022	0.2976							5	0.3137	0.303	0.293
'mini'	1	0.3096	0.2122	0.1837							2	0.3057	0.2101	0.1831							3	0.3127	0.2106	0.1846							4	0.3066	0.2133	0.1935							5	0.305	0.2031	0.1846
'mini'	1	0.3	0.1411	0.1306							2	0.2983	0.144	0.1294							3	0.305	0.1438	0.1316							4	0.3005	0.1456	0.1301							5	0.296	0.1426	0.12317
'mini'	1	0.2869	0.10406	0.10535							2	0.2827	0.10394	0.1073							3	0.2864	0.1036	0.1082							4	0.2827	0.10406	0.1046							5	0.2754	0.10223	0.1056
'mini'	1	0.2625	0.10095	0.10956							2	0.257	0.1005	0.10583							3	0.252	0.09955	0.108							4	0.258	0.10126	0.1046							5	0.256	0.10065	0.1028
'mini'	1	0.2355	0.0985	0.1022							2	0.2281	0.09894	0.1023							3	0.2264	0.1001	0.1031							4	0.2299	0.09955	0.1056							5	0.2325	0.0978	0.1027
'mini'	1	0.2063	0.1006	0.1018							2	0.1992	0.10016	0.1031							3	0.1912	0.0986	0.1048							4	0.199	0.1006	0.1001							5	0.2042	0.1003	0.10455
'mini'	1	0.18	0.1012	0.1027							2	0.1742	0.10065	0.0999							3	0.1749	0.0986	0.1008							4	0.1746	0.1005	0.09894							5	0.1854	0.0983	0.1019
'mini'	1	0.156	0.1001	0.09845							2	0.1533	0.0995	0.09985							3	0.1547	0.09973	0.0999							4	0.1573	0.10034	0.10126							5	0.1705	0.10126	0.101
'mini'	1	0.138	0.1002	0.10126							2	0.1383	0.10114	0.1037							3	0.139	0.0998	0.09973							4	0.149	0.1001	0.10095							5	0.1543	0.10016	0.1014
'traffic'	1	0.1082	0.1127	0.1208							2	0.09955	0.10406	0.1117							3	0.1052	0.1107	0.11774							4	0.1084	0.11487	0.1232							5	0.10583	0.10864	0.11444
'traffic'	1	0.1132	0.1257	0.1439							2	0.1049	0.1169	0.134							3	0.1112	0.1228	0.1403							4	0.1156	0.1267	0.1465							5	0.10956	0.11865	0.1365
'traffic'	1	0.1187	0.1399	0.1656							2	0.11005	0.1301	0.1649							3	0.1172	0.1365	0.1655							4	0.12164	0.1414	0.1736							5	0.1148	0.1323	0.1611
'traffic'	1	0.1251	0.1538	0.1898							2	0.1167	0.1469	0.1907							3	0.12317	0.1504	0.1938							4	0.127	0.1573	0.1969							5	0.1194	0.1471	0.1874
'traffic'	1	0.1317	0.1658	0.2148							2	0.1226	0.164	0.2168							3	0.1295	0.1659	0.2186							4	0.1339	0.173	0.2216							5	0.1251	0.1617	0.2087
'traffic'	1	0.1387	0.1798	0.2362							2	0.1302	0.1803	0.2389							3	0.1366	0.1832	0.2389							4	0.141	0.1874	0.2399							5	0.1318	0.1791	0.2307
'traffic'	1	0.1456	0.1951	0.2546							2	0.1367	0.1962	0.2551							3	0.1428	0.1995	0.2559							4	0.148	0.2019	0.2566							5	0.1383	0.192	0.2491
'traffic'	1	0.1538	0.2106	0.27							2	0.1461	0.2118	0.2703							3	0.1508	0.215	0.272							4	0.1547	0.2164	0.2708							5	0.1453	0.2042	0.265
'traffic'	1	0.159	0.2236	0.2842							2	0.1534	0.2267	0.284							3	0.1582	0.2262	0.2832							4	0.1624	0.2285	0.2832							5	0.1517	0.218	0.2776
'traffic'	1	0.165	0.2354	0.296							2	0.1616	0.2377	0.2937							3	0.1654	0.2375	0.295							4	0.1696	0.2395	0.2922							5	0.1581	0.2296	0.2874
'traffic'	1	0.226	0.3096	0.3367							2	0.2234	0.3054	0.3381							3	0.229	0.3086	0.3403							4	0.2317	0.3044	0.3325							5	0.2212	0.3005	0.3313
'traffic'	1	0.265	0.3313	0.3474							2	0.2666	0.3323	0.345							3	0.2683	0.3342	0.347							4	0.2666	0.327	0.3403							5	0.2625	0.3247	0.342
'traffic'	1	0.291	0.3416	0.3494							2	0.29	0.3396	0.3467							3	0.294	0.3413	0.3516							4	0.2913	0.3367	0.3423							5	0.2869	0.337	0.3442
'traffic'	1	0.305	0.3445	0.3506							2	0.3052	0.3416	0.3452							3	0.308	0.3467	0.3518							4	0.3052	0.3396	0.342							5	0.302	0.3418	0.3433
'traffic'	1	0.3147	0.3467	0.351							2	0.3142	0.3445	0.3442							3	0.3179	0.3484	0.3496							4	0.3115	0.3403	0.3428							5	0.3118	0.3423	0.344
'traffic'	1	0.3218	0.3464	0.3499							2	0.3179	0.3447	0.344							3	0.3225	0.3508	0.3499							4	0.3157	0.3425	0.3433							5	0.3206	0.343	0.3433
'traffic'	1	0.3245	0.346	0.3489							2	0.3232	0.3438	0.3442							3	0.3245	0.3513	0.3496							4	0.3196	0.3428	0.3435							5	0.324	0.3433	0.3433
'traffic'	1	0.3276	0.347	0.3484							2	0.3247	0.3438	0.3433							3	0.3284	0.3508	0.349							4	0.3237	0.344	0.344							5	0.326	0.3438	0.3433
'traffic'	1	0.3298	0.3472	0.3494							2	0.3281	0.3425	0.3435							3	0.3315	0.3499	0.3496							4	0.3264	0.3438	0.3425							5	0.3274	0.3423	0.3428
'traffic'	1	0.338	0.3472	0.3481							2	0.3364	0.3425	0.3438							3	0.3372	0.3503	0.3506							4	0.3333	0.3447	0.3408							5	0.3367	0.3438	0.3442
'traffic'	1	0.341	0.3467	0.3545							2	0.3396	0.3445	0.3484							3	0.3408	0.3516	0.3528							4	0.3354	0.3408	0.349							5	0.3406	0.346	0.348
'traffic'	1	0.3425	0.3486	0.3508							2	0.3416	0.3433	0.3489							3	0.3438	0.3506	0.352							4	0.3386	0.342	0.346							5	0.3433	0.3462	0.3484
'traffic'	1	0.3462	0.3484	0.3423							2	0.3455	0.3433	0.3433							3	0.346	0.3528	0.3438							4	0.3425	0.344	0.345							5	0.344	0.3425	0.3428
'traffic'	1	0.3486	0.345	0.3318							2	0.3486	0.3403	0.3298							3	0.347	0.3457	0.33							4	0.3452	0.3433	0.3284							5	0.345	0.3425	0.3315
'traffic'	1	0.3508	0.3389	0.3152							2	0.35	0.3384	0.317							3	0.3486	0.3416	0.3188							4	0.3484	0.3367	0.317							5	0.3455	0.334	0.314
'traffic'	1	0.3523	0.3213	0.3015							2	0.3499	0.3254	0.3103							3	0.349	0.331	0.3052							4	0.351	0.3232	0.3022							5	0.3477	0.3274	0.2983
'traffic'	1	0.3523	0.315	0.2852							2	0.35	0.3252	0.2786							3	0.3508	0.3198	0.2822							4	0.3516	0.316	0.2817							5	0.3457	0.3145	0.2856
'traffic'	1	0.3538	0.3052	0.2668							2	0.3503	0.3052	0.2703							3	0.3503	0.311	0.2793							4	0.3513	0.308	0.2693							5	0.348	0.308	0.2712
'traffic'	1	0.3188	0.2275	0.1874							2	0.3174	0.2318	0.1873							3	0.3186	0.223	0.1874							4	0.31	0.2203	0.189							5	0.3184	0.2256	0.1936
'traffic'	1	0.2708	0.1494	0.121							2	0.2778	0.1506	0.1256							3	0.2852	0.1504	0.1323							4	0.274	0.1484	0.1263							5	0.2698	0.1501	0.1241
'traffic'	1	0.2334	0.10284	0.1107							2	0.2305	0.10345	0.10974							3	0.2559	0.1039	0.1071							4	0.2363	0.10114	0.1119							5	0.2365	0.09955	0.11005
'traffic'	1	0.1967	0.0997	0.1099							2	0.1963	0.10315	0.107							3	0.2146	0.09845	0.10406							4	0.1918	0.1016	0.10657							5	0.2015	0.09814	0.1028
'traffic'	1	0.1669	0.10065	0.10516							2	0.1643	0.09784	0.10315							3	0.1697	0.09924	0.1027							4	0.1576	0.09894	0.0998							5	0.161	0.0974	0.1024
'traffic'	1	0.1343	0.09924	0.10187							2	0.1315	0.10126	0.10187							3	0.139	0.09937	0.09985							4	0.12463	0.1012	0.0988							5	0.1259	0.1004	0.0999
'traffic'	1	0.1234	0.09955	0.1032							2	0.12286	0.1008	0.10266							3	0.12244	0.0995	0.09924							4	0.1135	0.1004	0.0999							5	0.11505	0.101	0.1001
'traffic'	1	0.1061	0.09924	0.102							2	0.1146	0.10156	0.1019							3	0.11774	0.10077	0.10187							4	0.1115	0.1015	0.09937							5	0.1066	0.1011	0.1006
'traffic'	1	0.1048	0.1006	0.0979							2	0.10986	0.10034	0.1049							3	0.11206	0.1002	0.1027							4	0.1069	0.1008	0.10223							5	0.10406	0.1002	0.1033
