# Supplementary material
Source: ML conference proceedings conference paper supplement (https://openreview.net/forum?id=qkLMTphG5-h)
Supplement: supplementary_material [file attachment]

## Sheet: 5way_1shot_SGD_USA_IUSO
		SGD	+USA	+I/USA		Average	SGD	+USA	+I/USA			SGD	+USA	+I/USA		Average	SGD	+USA	+I/USA			SGD	+USA	+I/USA		Average	SGD	+USA	+I/USA			SGD	+USA	+I/USA		Average	SGD	+USA	+I/USA			SGD	+USA	+I/USA		Average	SGD	+USA	+I/USA
'cub'	1	0.216	0.2168	0.2134		'cub'	0.306884	0.310549	0.255627		2	0.2058	0.2065	0.2032		'cub'	0.291846	0.2949	0.245005		3	0.2006	0.2014	0.1984		'cub'	0.300462	0.303984	0.248689		4	0.2013	0.201	0.1991		'cub'	0.296568	0.299251	0.245814		5	0.2028	0.2035	0.2009		'cub'	0.303695	0.306216	0.252427
'cub'	1	0.2188	0.2197	0.2141		'flower'	0.397854	0.403122	0.300314			0.208	0.2091	0.2036		'flower'	0.409062	0.415181	0.307654			0.2036	0.2052	0.2008		'flower'	0.401195	0.406768	0.303376			0.2039	0.2046	0.1998		'flower'	0.407524	0.412381	0.305797			0.2065	0.208	0.2019		'flower'	0.404554	0.410157	0.304251
'cub'	1	0.2212	0.222	0.2147		'mini'	0.372957	0.376186	0.290268			0.2109	0.2104	0.2043		'mini'	0.372941	0.376516	0.288			0.2079	0.2085	0.2007		'mini'	0.367697	0.369808	0.287159			0.2078	0.2086	0.1997		'mini'	0.373997	0.377211	0.286597			0.2098	0.212	0.2028		'mini'	0.371251	0.374457	0.284978
'cub'	1	0.2225	0.2239	0.2162		'traffic'	0.348922	0.358219	0.284476			0.2135	0.2134	0.2043		'traffic'	0.343697	0.351832	0.277627			0.2114	0.213	0.2035		'traffic'	0.327981	0.335773	0.272303			0.2103	0.2106	0.2017		'traffic'	0.337003	0.344957	0.279603			0.2136	0.2151	0.205		'traffic'	0.342232	0.350319	0.279903
'cub'	1	0.2261	0.2268	0.2179		Average	0.356654	0.362019	0.282671			0.216	0.2163	0.2053		Average	0.354386	0.359607	0.279572			0.2153	0.2164	0.2043		Average	0.349334	0.354083	0.277882			0.212	0.213	0.2032		Average	0.353773	0.35845	0.279453			0.2177	0.2191	0.2072		Average	0.355433	0.360287	0.28039
'cub'	1	0.228	0.2314	0.219				0.00536486				0.2186	0.2195	0.2081				0.00522095				0.2184	0.2219	0.2062				0.00474932				0.214	0.2164	0.2021				0.00467703				0.2205	0.2224	0.2083				0.00485405
'cub'	1	0.2323	0.2346	0.2207								0.2212	0.223	0.2097								0.2228	0.2252	0.2073								0.218	0.22	0.2043								0.223	0.2253	0.2113
'cub'	1	0.2355	0.2369	0.2219		Top1 Acc.	SGD	+USA	+I/USA			0.2235	0.2255	0.2097		Top1 Acc.	SGD	+USA	+I/USA			0.2269	0.2301	0.2075		Top1 Acc.	SGD	+USA	+I/USA			0.2208	0.2246	0.2052		Top1 Acc.	SGD	+USA	+I/USA			0.2272	0.2302	0.2133		Top1 Acc.	SGD	+USA	+I/USA
'cub'	1	0.2386	0.2422	0.2236		'cub'	0.3652	0.3662	0.345			0.227	0.2297	0.2098		'cub'	0.3503	0.3513	0.3333			0.2292	0.2336	0.2092		'cub'	0.3625	0.3645	0.3452			0.2249	0.2285	0.2053		'cub'	0.361	0.359	0.3354			0.2316	0.2351	0.2153		'cub'	0.3635	0.3633	0.3513
'cub'	1	0.2426	0.2471	0.2246		'flower'	0.5083	0.509	0.4893			0.2289	0.2328	0.2106		'flower'	0.5283	0.529	0.499			0.2323	0.2365	0.211		'flower'	0.511	0.511	0.484			0.2275	0.2312	0.2052		'flower'	0.5195	0.5215	0.4924			0.2366	0.2399	0.216		'flower'	0.522	0.522	0.4963
'cub'	1	0.2705	0.2756	0.2358		'mini'	0.4656	0.4634	0.4465			0.252	0.2566	0.2235		'mini'	0.4692	0.4727	0.4375			0.2612	0.266	0.223		'mini'	0.454	0.4573	0.4382			0.2556	0.2568	0.2178		'mini'	0.4734	0.4707	0.444			0.2642	0.2686	0.2329		'mini'	0.4614	0.4612	0.4343
'cub'	1	0.2915	0.2974	0.2485		'traffic'	0.4446	0.4456	0.419			0.2695	0.2717	0.2316		'traffic'	0.4338	0.4375	0.4116			0.2827	0.288	0.2366		'traffic'	0.4248	0.4211	0.3972			0.2737	0.2773	0.2299		'traffic'	0.4194	0.4187	0.4016			0.2844	0.2903	0.2437		'traffic'	0.437	0.4375	0.4136
'cub'	1	0.3074	0.3103	0.258		Average	0.445925	0.44605	0.42495			0.285	0.2888	0.2428		Average	0.4454	0.447625	0.42035			0.2964	0.301	0.2517		Average	0.438075	0.438475	0.41615			0.2896	0.2898	0.2405		Average	0.443325	0.442475	0.41835			0.3022	0.303	0.256		Average	0.445975	0.446	0.423875
'cub'	1	0.3174	0.3198	0.2686				0.000125				0.2952	0.2993	0.2494				0.002225				0.3074	0.3105	0.2622				0.0004				0.297	0.2993	0.252				-0.00085				0.3113	0.3115	0.266				2.5e-05
'cub'	1	0.3235	0.326	0.2756								0.3018	0.3047	0.2625								0.3137	0.3167	0.268								0.3042	0.3066	0.2632								0.319	0.3174	0.2722
'cub'	1	0.329	0.3306	0.2825		Top-N%	SGD	+USA	+I/USA			0.3057	0.3086	0.2683		Top-N%	SGD	+USA	+I/USA			0.3188	0.3198	0.277		Top-N%	SGD	+USA	+I/USA			0.308	0.3103	0.2686		Top-N%	SGD	+USA	+I/USA			0.3235	0.3237	0.2822		Top-N%	SGD	+USA	+I/USA
'cub'	1	0.3318	0.3337	0.2898		'cub'	0.352793	0.356227	0.308633			0.3105	0.3115	0.2742		'cub'	0.337307	0.34028	0.293367			0.322	0.323	0.2854		'cub'	0.350707	0.35394	0.304347			0.3115	0.3123	0.2751		'cub'	0.34734	0.34976	0.29782			0.3247	0.3264	0.2922		'cub'	0.352673	0.355453	0.308467
'cub'	1	0.335	0.3364	0.295		'flower'	0.488927	0.492607	0.416			0.3147	0.3135	0.279		'flower'	0.506167	0.511593	0.425233			0.324	0.3254	0.2888		'flower'	0.491933	0.49578	0.416987			0.314	0.3157	0.2795		'flower'	0.5042	0.507487	0.4238			0.3281	0.3293	0.2996		'flower'	0.501253	0.505733	0.423047
'cub'	1	0.337	0.3384	0.2988		'mini'	0.449433	0.451593	0.386373			0.3152	0.316	0.2832		'mini'	0.45164	0.453653	0.384427			0.325	0.328	0.293		'mini'	0.44414	0.444873	0.382927			0.3171	0.319	0.285		'mini'	0.455707	0.45692	0.3817			0.3315	0.3313	0.306		'mini'	0.445067	0.445419	0.37796
'cub'	1	0.3452	0.3477	0.3235		'traffic'	0.430207	0.432033	0.3648			0.326	0.3293	0.308		'traffic'	0.417233	0.420593	0.360327			0.3381	0.3376	0.318		'traffic'	0.403833	0.4065	0.346987			0.3318	0.331	0.308		'traffic'	0.406813	0.408107	0.351307			0.3435	0.3433	0.3228		'traffic'	0.420607	0.423673	0.36254
'cub'	1	0.3506	0.351	0.334		Average	0.43034	0.433115	0.368952			0.3298	0.3318	0.314		Average	0.428087	0.43153	0.365838			0.3457	0.3457	0.3262		Average	0.422653	0.425273	0.362812			0.3354	0.3354	0.322		Average	0.428515	0.430568	0.363657			0.3508	0.3508	0.332		Average	0.4299	0.43257	0.368003
'cub'	1	0.353	0.356	0.3376				0.002775				0.3347	0.3357	0.3198				0.00344333				0.3489	0.352	0.3357				0.00262				0.339	0.339	0.3276				0.00205333				0.3552	0.3567	0.3372				0.00266969
'cub'	1	0.355	0.3604	0.343								0.3374	0.3386	0.3247								0.3538	0.356	0.34								0.3438	0.3435	0.3315								0.3572	0.358	0.345
'cub'	1	0.3577	0.3616	0.344		15						0.3416	0.3406	0.3281								0.3557	0.3572	0.3438								0.3477	0.3494	0.3347								0.359	0.3582	0.3472
'cub'	1	0.3594	0.363	0.345		'cub'	0.335	0.3384	0.262			0.346	0.346	0.3333		'cub'	0.321	0.3289	0.2494			0.358	0.3586	0.3452		'cub'	0.3271	0.3376	0.2622			0.3535	0.3542	0.3354		'cub'	0.3318	0.3354	0.252			0.3596	0.3604	0.3513		'cub'	0.3323	0.3403	0.2593
'cub'	1	0.3596	0.3618	0.3293		'flower'	0.4592	0.4634	0.3347			0.3486	0.3484	0.3176		'flower'	0.4688	0.483	0.3474			0.36	0.3586	0.3289		'flower'	0.4614	0.4678	0.3347			0.3582	0.358	0.3286		'flower'	0.4766	0.4866	0.336			0.3635	0.3628	0.3328		'flower'	0.463	0.476	0.337
'cub'	1	0.3638	0.3638	0.3008		'mini'	0.4214	0.4268	0.3132			0.35	0.3486	0.285		'mini'	0.4263	0.4314	0.3062			0.3625	0.3604	0.288		'mini'	0.4202	0.426	0.306			0.3577	0.358	0.2944		'mini'	0.4258	0.4324	0.3027			0.3635	0.363	0.2812		'mini'	0.4185	0.4238	0.3037
'cub'	1	0.3652	0.3662	0.262		'traffic'	0.4067	0.41	0.3066			0.3503	0.3513	0.2534		'traffic'	0.398	0.4016	0.2898			0.3616	0.3606	0.265		'traffic'	0.3794	0.385	0.291			0.3577	0.359	0.2617		'traffic'	0.3853	0.3901	0.29			0.3623	0.3633	0.2593		'traffic'	0.398	0.402	0.291
'cub'	1	0.3606	0.3645	0.2476		Average	0.405575	0.40965	0.304125			0.3452	0.3513	0.2373		Average	0.403525	0.411225	0.2982			0.359	0.3645	0.2433		Average	0.397025	0.4041	0.298475			0.361	0.3584	0.2394		Average	0.404875	0.411125	0.295175			0.356	0.3633	0.2296		Average	0.40295	0.410525	0.29775
'cub'	1	0.3562	0.361	0.2128								0.341	0.3474	0.2246								0.3572	0.3613	0.2142								0.3557	0.3586	0.2256								0.353	0.3594	0.2158
'cub'	1	0.3506	0.3572	0.2047								0.3354	0.3413	0.214								0.352	0.3599	0.2023								0.3533	0.3577	0.2141								0.3496	0.355	0.2091
'cub'	1	0.343	0.351	0.2067								0.3264	0.335	0.215								0.345	0.3513	0.2081								0.3457	0.3518	0.2101								0.3438	0.3528	0.2058
'cub'	1	0.3325	0.3398	0.2009								0.3262	0.33	0.2036								0.336	0.346	0.2004								0.3376	0.3457	0.207								0.3408	0.3445	0.2119
'cub'	1	0.3274	0.3333	0.2075								0.321	0.3289	0.1993								0.3271	0.3394	0.2031								0.332	0.3423	0.2006								0.3323	0.3403	0.2028
'cub'	1	0.3232	0.336	0.207								0.3147	0.3215	0.2								0.3198	0.3306	0.198								0.3284	0.3354	0.209								0.33	0.3325	0.2064
'cub'	1	0.318	0.3254	0.2035								0.3044	0.3174	0.2034								0.3127	0.3208	0.2025								0.3157	0.33	0.2028								0.3213	0.3286	0.2046
'cub'	1	0.309	0.321	0.2096								0.2966	0.3113	0.201								0.3044	0.3167	0.2042								0.3076	0.3193	0.2054								0.3171	0.325	0.2122
'flower'	1	0.2031	0.2032	0.1997								0.2036	0.204	0.1996								0.2076	0.2087	0.2039								0.2087	0.21	0.2054								0.2035	0.2036	0.2003
'flower'	1	0.2087	0.2104	0.2009								0.2103	0.212	0.2037								0.2144	0.2155	0.2064								0.2142	0.2158	0.2064								0.2078	0.2094	0.202
'flower'	1	0.2147	0.2163	0.2028								0.2173	0.2213	0.205								0.2211	0.2249	0.2064								0.2198	0.2224	0.2069								0.213	0.2156	0.2031
'flower'	1	0.2201	0.2249	0.2062								0.2263	0.2285	0.2058								0.2281	0.2329	0.2094								0.2249	0.228	0.2091								0.2188	0.223	0.2041
'flower'	1	0.2272	0.2323	0.2072								0.2327	0.2372	0.2085								0.2378	0.241	0.2126								0.2318	0.2362	0.2108								0.226	0.2324	0.2048
'flower'	1	0.2356	0.2426	0.2106								0.2404	0.2477	0.2122								0.243	0.2487	0.2148								0.238	0.2441	0.2125								0.2345	0.2427	0.2057
'flower'	1	0.2439	0.2494	0.2113								0.2491	0.2566	0.2144								0.2505	0.2559	0.2186								0.2451	0.2522	0.2148								0.244	0.25	0.2081
'flower'	1	0.251	0.2573	0.2147								0.2568	0.2659	0.2178								0.2563	0.2644	0.222								0.2524	0.261	0.2173								0.2515	0.2598	0.2106
'flower'	1	0.2573	0.2637	0.2169								0.2664	0.2734	0.2205								0.2642	0.2725	0.2255								0.261	0.269	0.2185								0.2605	0.2676	0.212
'flower'	1	0.2637	0.2715	0.2183								0.273	0.2815	0.2224								0.2717	0.2798	0.228								0.269	0.2783	0.2222								0.2666	0.276	0.2157
'flower'	1	0.3357	0.3447	0.2466								0.3447	0.353	0.2534								0.3347	0.3433	0.2556								0.3347	0.3472	0.249								0.3325	0.3425	0.2494
'flower'	1	0.3818	0.3884	0.278								0.388	0.396	0.2893								0.3792	0.3862	0.2834								0.3813	0.3882	0.2786								0.379	0.3867	0.281
'flower'	1	0.4106	0.4138	0.3088								0.41	0.4158	0.323								0.4058	0.4114	0.3113								0.407	0.4116	0.309								0.4082	0.4136	0.31
'flower'	1	0.428	0.4314	0.3347								0.424	0.429	0.3474								0.4224	0.4246	0.3389								0.4226	0.4263	0.336								0.428	0.4297	0.337
'flower'	1	0.44	0.4434	0.3574								0.4385	0.441	0.3696								0.436	0.438	0.358								0.4363	0.4375	0.3596								0.4395	0.4397	0.3586
'flower'	1	0.448	0.4502	0.3713								0.4495	0.4531	0.3845								0.4434	0.446	0.3748								0.444	0.4458	0.3782								0.447	0.449	0.373
'flower'	1	0.455	0.4548	0.3835								0.4585	0.4604	0.398								0.453	0.4539	0.3875								0.451	0.4531	0.3928								0.455	0.4546	0.3892
'flower'	1	0.4592	0.459	0.391								0.4636	0.4656	0.4067								0.4575	0.4583	0.3975								0.4578	0.4583	0.4058								0.4607	0.46	0.4016
'flower'	1	0.463	0.4634	0.4028								0.4688	0.4695	0.4143								0.463	0.4622	0.4092								0.4626	0.4617	0.4172								0.463	0.4653	0.4124
'flower'	1	0.4805	0.4807	0.4475								0.487	0.4875	0.4548								0.4805	0.481	0.4487								0.4883	0.4866	0.46								0.4883	0.4873	0.4565
'flower'	1	0.488	0.488	0.4592								0.4954	0.4973	0.4717								0.4895	0.4905	0.4634								0.4968	0.4976	0.4763								0.4932	0.4924	0.473
'flower'	1	0.4934	0.493	0.472								0.5044	0.5073	0.484								0.496	0.4954	0.4727								0.504	0.504	0.4868								0.4995	0.502	0.4836
'flower'	1	0.4995	0.4976	0.4817								0.513	0.514	0.4944								0.5015	0.499	0.4802								0.508	0.509	0.4912								0.5073	0.5073	0.4927
'flower'	1	0.503	0.503	0.4893								0.5205	0.5195	0.499								0.509	0.5073	0.484								0.511	0.5117	0.4924								0.514	0.5137	0.4963
'flower'	1	0.5063	0.509	0.481								0.523	0.523	0.4954								0.5093	0.5093	0.4832								0.514	0.514	0.486								0.522	0.517	0.4924
'flower'	1	0.508	0.507	0.4404								0.526	0.528	0.4465								0.511	0.51	0.4482								0.5176	0.5166	0.43								0.5205	0.5176	0.447
'flower'	1	0.508	0.508	0.3772								0.528	0.529	0.3633								0.511	0.5093	0.3738								0.5186	0.517	0.377								0.519	0.518	0.3843
'flower'	1	0.5083	0.5083	0.351								0.5283	0.5283	0.3489								0.5107	0.511	0.3347								0.5195	0.518	0.3677								0.5205	0.5195	0.3481
'flower'	1	0.4954	0.5034	0.27								0.522	0.5283	0.315								0.4983	0.5103	0.2986								0.5166	0.5215	0.2969								0.514	0.522	0.2966
'flower'	1	0.4841	0.5015	0.2318								0.512	0.5225	0.23								0.4863	0.5024	0.2279								0.5107	0.517	0.2297								0.509	0.52	0.2325
'flower'	1	0.475	0.4868	0.2246								0.502	0.514	0.2135								0.4785	0.4917	0.2153								0.504	0.5117	0.205								0.4954	0.51	0.2266
'flower'	1	0.4622	0.475	0.1992								0.4858	0.4988	0.2184								0.473	0.4822	0.2095								0.4937	0.506	0.2191								0.4817	0.4978	0.2115
'flower'	1	0.4534	0.4644	0.2017								0.4763	0.4934	0.2081								0.4614	0.4695	0.2034								0.4836	0.4941	0.2114								0.4714	0.4854	0.2067
'flower'	1	0.444	0.4578	0.2028								0.4644	0.483	0.2086								0.4487	0.4678	0.2021								0.4766	0.4875	0.2124								0.4624	0.476	0.2094
'flower'	1	0.4355	0.4497	0.2075								0.4497	0.4673	0.2122								0.4382	0.4592	0.2067								0.462	0.4756	0.2028								0.4485	0.465	0.2091
'flower'	1	0.4194	0.4358	0.2128								0.442	0.4612	0.2113								0.4316	0.449	0.2051								0.4517	0.4692	0.2075								0.4387	0.4524	0.2067
'flower'	1	0.41	0.4258	0.1992								0.434	0.4478	0.212								0.42	0.4373	0.2036								0.4395	0.4543	0.2122								0.424	0.4512	0.2057
'mini'	1	0.2134	0.2145	0.2122								0.21	0.2104	0.2058								0.2041	0.2039	0.2012								0.2081	0.2087	0.2051								0.2113	0.2119	0.2079
'mini'	1	0.2213	0.2223	0.2148								0.2153	0.2163	0.2087								0.21	0.2113	0.2053								0.2134	0.2148	0.2075								0.2162	0.217	0.2096
'mini'	1	0.2253	0.2273	0.2158								0.22	0.222	0.211								0.2153	0.217	0.2068								0.2194	0.2216	0.2106								0.2225	0.2244	0.2119
'mini'	1	0.2324	0.2345	0.2194								0.2273	0.2289	0.2152								0.2229	0.2251	0.2101								0.225	0.2269	0.2134								0.2278	0.2313	0.2141
'mini'	1	0.2389	0.2415	0.2231								0.2325	0.2369	0.2181								0.2291	0.2327	0.2125								0.2295	0.2332	0.2162								0.2338	0.2374	0.2169
'mini'	1	0.2432	0.248	0.2256								0.2389	0.2432	0.2212								0.2351	0.2405	0.2164								0.2347	0.2385	0.219								0.2393	0.2441	0.2179
'mini'	1	0.2496	0.2532	0.2283								0.2451	0.251	0.2239								0.2423	0.2454	0.2214								0.242	0.246	0.2213								0.2449	0.25	0.2214
'mini'	1	0.2551	0.259	0.2327								0.252	0.257	0.2264								0.2474	0.2532	0.2227								0.2476	0.2522	0.2235								0.252	0.259	0.2246
'mini'	1	0.2612	0.2642	0.2346								0.2595	0.2642	0.2297								0.254	0.2595	0.2258								0.2512	0.2566	0.2251								0.2605	0.2656	0.2272
'mini'	1	0.2664	0.2703	0.2374								0.2654	0.2727	0.2323								0.2603	0.2646	0.2294								0.257	0.2617	0.2268								0.2668	0.2725	0.2307
'mini'	1	0.3167	0.324	0.2654								0.319	0.323	0.2607								0.3132	0.3198	0.2598								0.307	0.317	0.255								0.3196	0.326	0.2568
'mini'	1	0.3523	0.3552	0.2974								0.3489	0.3545	0.286								0.345	0.3486	0.2852								0.349	0.3523	0.2795								0.355	0.3616	0.2834
'mini'	1	0.3733	0.3777	0.3132								0.3694	0.3752	0.3062								0.366	0.3655	0.306								0.3733	0.377	0.3027								0.3745	0.3818	0.3037
'mini'	1	0.387	0.3892	0.3293								0.3877	0.389	0.3262								0.38	0.3809	0.324								0.3887	0.391	0.321								0.3906	0.3926	0.3228
'mini'	1	0.3984	0.4	0.3438								0.3977	0.3984	0.3403								0.3916	0.3909	0.339								0.3977	0.3972	0.3345								0.3982	0.3997	0.3372
'mini'	1	0.4055	0.4043	0.3545								0.4043	0.405	0.3535								0.3997	0.3972	0.352								0.4033	0.4043	0.345								0.405	0.4045	0.3508
'mini'	1	0.4114	0.4094	0.3623								0.41	0.4092	0.365								0.4053	0.4036	0.3643								0.4087	0.41	0.3555								0.4106	0.407	0.3608
'mini'	1	0.4167	0.414	0.371								0.4143	0.4114	0.372								0.4084	0.408	0.372								0.4146	0.4143	0.3635								0.415	0.4116	0.3716
'mini'	1	0.4214	0.4177	0.3804								0.4175	0.414	0.377								0.4116	0.4114	0.38								0.4194	0.4187	0.3696								0.4185	0.4138	0.3804
'mini'	1	0.4368	0.4346	0.4155								0.4324	0.4314	0.4094								0.4294	0.426	0.413								0.4333	0.4324	0.4036								0.433	0.43	0.4124
'mini'	1	0.4434	0.4453	0.4275								0.4387	0.4355	0.4224								0.4346	0.4333	0.423								0.4417	0.4402	0.4197								0.4402	0.4392	0.4243
'mini'	1	0.4492	0.453	0.4355								0.443	0.444	0.43								0.443	0.439	0.4285								0.4504	0.4478	0.431								0.4443	0.444	0.43
'mini'	1	0.4558	0.4583	0.4426								0.4492	0.4487	0.4348								0.446	0.443	0.433								0.4592	0.4575	0.439								0.4482	0.452	0.4321
'mini'	1	0.4585	0.462	0.4465								0.4558	0.4531	0.436								0.4502	0.45	0.4377								0.4648	0.465	0.444								0.453	0.4546	0.4343
'mini'	1	0.4634	0.4626	0.4382								0.459	0.4575	0.4375								0.4524	0.4526	0.4382								0.47	0.4688	0.4412								0.457	0.4578	0.4197
'mini'	1	0.4656	0.4634	0.3977								0.4622	0.4604	0.4111								0.454	0.4539	0.4036								0.471	0.467	0.4053								0.46	0.459	0.3853
'mini'	1	0.4646	0.4622	0.3376								0.4658	0.4646	0.345								0.4536	0.4556	0.3296								0.47	0.4673	0.3499								0.4604	0.4612	0.304
'mini'	1	0.4646	0.462	0.27								0.468	0.465	0.2778								0.4524	0.456	0.2903								0.4695	0.468	0.2822								0.4614	0.46	0.2742
'mini'	1	0.457	0.4585	0.2228								0.4692	0.4727	0.2303								0.4531	0.4573	0.2443								0.4734	0.4707	0.2374								0.455	0.4573	0.2395
'mini'	1	0.454	0.4592	0.2101								0.463	0.471	0.2115								0.4517	0.4553	0.2225								0.4656	0.4697	0.2157								0.447	0.4536	0.2139
'mini'	1	0.4468	0.4517	0.2041								0.4536	0.4631	0.2075								0.4463	0.446	0.2115								0.4573	0.4626	0.21								0.441	0.443	0.2126
'mini'	1	0.4358	0.44	0.2081								0.4497	0.4543	0.2075								0.4414	0.442	0.2042								0.4463	0.4563	0.2054								0.43	0.4358	0.2063
'mini'	1	0.4246	0.4343	0.2047								0.4387	0.4487	0.2018								0.4338	0.4363	0.2013								0.4373	0.443	0.2079								0.427	0.4316	0.2014
'mini'	1	0.4138	0.4268	0.2017								0.4263	0.4348	0.207								0.4202	0.4268	0.207								0.4258	0.4375	0.2065								0.4165	0.4238	0.2
'mini'	1	0.4028	0.4153	0.205								0.412	0.4272	0.2012								0.4062	0.419	0.2018								0.4153	0.4304	0.2062								0.4053	0.4238	0.1997
'mini'	1	0.3928	0.4067	0.2065								0.3987	0.413	0.2013								0.3997	0.4116	0.2018								0.4058	0.4192	0.2017								0.4006	0.4138	0.2013
'mini'	1	0.3804	0.3967	0.2046								0.3787	0.4038	0.2047								0.3955	0.4001	0.1997								0.3916	0.4114	0.2026								0.3943	0.4026	0.2035
'traffic'	1	0.2163	0.217	0.2114								0.2052	0.205	0.2028								0.2013	0.2017	0.1982								0.218	0.2183	0.2141								0.2004	0.2006	0.1981
'traffic'	1	0.2216	0.2223	0.2137								0.2091	0.2101	0.2039								0.204	0.2056	0.1985								0.2246	0.2256	0.2153								0.2047	0.206	0.2006
'traffic'	1	0.2273	0.2284	0.2168								0.2135	0.2162	0.2054								0.2084	0.2094	0.2003								0.2302	0.2308	0.2183								0.209	0.2109	0.2026
'traffic'	1	0.2328	0.2344	0.2181								0.2196	0.2229	0.207								0.2106	0.2129	0.2025								0.2347	0.2367	0.2208								0.2144	0.2169	0.2036
'traffic'	1	0.2368	0.2404	0.2212								0.228	0.2317	0.21								0.2156	0.2183	0.2047								0.24	0.2424	0.2228								0.2197	0.2227	0.2067
'traffic'	1	0.2441	0.248	0.2213								0.2344	0.2394	0.2119								0.2208	0.2235	0.2076								0.2458	0.2502	0.2257								0.2253	0.2289	0.21
'traffic'	1	0.25	0.2534	0.2253								0.2408	0.2456	0.2153								0.2272	0.2303	0.2092								0.2522	0.2578	0.2301								0.2303	0.2347	0.2128
'traffic'	1	0.254	0.2568	0.228								0.2462	0.2512	0.218								0.2335	0.2378	0.2126								0.2585	0.2642	0.2343								0.2368	0.2416	0.2145
'traffic'	1	0.2607	0.265	0.231								0.2527	0.2593	0.2206								0.2386	0.2432	0.2158								0.2668	0.2725	0.237								0.2438	0.2483	0.2191
'traffic'	1	0.2659	0.2734	0.2354								0.261	0.266	0.2238								0.2462	0.2502	0.2183								0.273	0.2788	0.2394								0.2498	0.2566	0.2208
'traffic'	1	0.3262	0.3323	0.265								0.3198	0.329	0.2542								0.2966	0.3052	0.244								0.3242	0.3328	0.2632								0.3176	0.325	0.255
'traffic'	1	0.362	0.3662	0.2917								0.3562	0.3625	0.2812								0.334	0.3398	0.2698								0.355	0.3616	0.287								0.3564	0.362	0.2864
'traffic'	1	0.3818	0.3855	0.313								0.3765	0.379	0.305								0.3545	0.3564	0.291								0.37	0.3726	0.3044								0.3762	0.3782	0.3113
'traffic'	1	0.3933	0.398	0.3284								0.3875	0.389	0.326								0.3655	0.3647	0.3132								0.3782	0.3806	0.3167								0.387	0.3872	0.3328
'traffic'	1	0.4011	0.4028	0.3445								0.3953	0.3953	0.34								0.3726	0.3757	0.3264								0.3853	0.3862	0.3318								0.3938	0.3962	0.3462
'traffic'	1	0.4077	0.41	0.3547								0.398	0.399	0.3503								0.3806	0.3828	0.3372								0.3916	0.3901	0.342								0.398	0.4004	0.356
'traffic'	1	0.4124	0.4143	0.3638								0.4006	0.4016	0.3618								0.3853	0.3867	0.346								0.3945	0.3948	0.3494								0.4011	0.4028	0.3618
'traffic'	1	0.417	0.4182	0.369								0.4014	0.403	0.3667								0.3894	0.3896	0.35								0.3987	0.3977	0.359								0.4043	0.4065	0.3665
'traffic'	1	0.418	0.4211	0.376								0.4028	0.402	0.374								0.3923	0.391	0.3564								0.3997	0.3984	0.3635								0.4075	0.4097	0.373
'traffic'	1	0.4294	0.43	0.3984								0.4146	0.4133	0.3955								0.4011	0.402	0.3792								0.405	0.4048	0.3826								0.417	0.4185	0.3958
'traffic'	1	0.4358	0.4363	0.41								0.417	0.419	0.4019								0.4062	0.406	0.392								0.4104	0.4087	0.3926								0.4229	0.4229	0.4065
'traffic'	1	0.439	0.4385	0.4163								0.4175	0.42	0.408								0.4082	0.4102	0.3958								0.414	0.4128	0.3967								0.4258	0.4275	0.4097
'traffic'	1	0.44	0.4412	0.419								0.4229	0.424	0.4116								0.414	0.413	0.3972								0.4146	0.4155	0.4016								0.4321	0.4314	0.4136
'traffic'	1	0.4426	0.4404	0.4006								0.4297	0.4268	0.4045								0.4177	0.4148	0.3865								0.4153	0.4167	0.387								0.4353	0.4346	0.404
'traffic'	1	0.443	0.4402	0.3647								0.4324	0.429	0.361								0.4167	0.4165	0.335								0.4167	0.416	0.3486								0.437	0.4373	0.3594
'traffic'	1	0.4443	0.4456	0.307								0.431	0.433	0.3088								0.4185	0.4167	0.3057								0.4194	0.417	0.3037								0.4365	0.4368	0.3105
'traffic'	1	0.4446	0.444	0.3066								0.4321	0.4353	0.283								0.4229	0.4197	0.2837								0.4187	0.4187	0.29								0.4343	0.437	0.288
'traffic'	1	0.4446	0.4421	0.2864								0.4338	0.4353	0.2898								0.4248	0.4211	0.2932								0.4172	0.4182	0.282								0.4338	0.4375	0.291
'traffic'	1	0.428	0.4346	0.2607								0.4246	0.4375	0.2502								0.4004	0.419	0.262								0.4011	0.4116	0.2551								0.4185	0.4321	0.262
'traffic'	1	0.4067	0.424	0.2156								0.4001	0.4229	0.2172								0.3794	0.4062	0.2267								0.3794	0.4006	0.2322								0.405	0.4185	0.2313
'traffic'	1	0.374	0.4036	0.2166								0.3804	0.4062	0.2134								0.3682	0.385	0.2231								0.3591	0.3835	0.2137								0.3845	0.402	0.2295
'traffic'	1	0.3606	0.384	0.2162								0.3618	0.3755	0.2208								0.3403	0.374	0.2225								0.3308	0.3594	0.2107								0.3655	0.3823	0.2197
'traffic'	1	0.327	0.3708	0.2205								0.3438	0.3704	0.2084								0.3188	0.3472	0.2144								0.309	0.3538	0.2136								0.3367	0.369	0.2109
'traffic'	1	0.3066	0.3467	0.2168								0.3357	0.358	0.2054								0.2976	0.327	0.217								0.2961	0.3164	0.2177								0.32	0.353	0.2109
'traffic'	1	0.281	0.3228	0.2115								0.3115	0.3535	0.2036								0.2834	0.3176	0.2023								0.281	0.3157	0.2096								0.3105	0.3384	0.2097
'traffic'	1	0.2712	0.32	0.219								0.291	0.3293	0.1954								0.2747	0.3088	0.2172								0.2737	0.304	0.2198								0.2896	0.3298	0.2147
'traffic'	1	0.2627	0.3018	0.2114								0.2883	0.321	0.2158								0.2654	0.294	0.22								0.2666	0.2979	0.2133								0.2815	0.318	0.2114
		0.356654	0.362019	0.282671								0.354386	0.359607									0.349334	0.354083									0.353773	0.35845									0.355433	0.360287
			0.00536486										0.00522095										0.00474932										0.00467703										0.00485405
